# Supplementary material for: A Comparative Metabolomic Analysis Reveals Difference Manufacture Suitability in “Yinghong 9” and “Huangyu” Teas (Camellia sinensis)
Source: Front Plant Sci. 2021 Dec 14;12:767724. doi: 10.3389/fpls.2021.767724 (PMC8712721; doi:10.3389/fpls.2021.767724)
Supplement: Supplementary Table 1 — Representative differential metabolites between “Yinghong 9” and “Huangyu” fresh leaves. [file Table_1.XLSX]

## Sheet: Sheet1
Index	Formula	Compounds	Class I	Class II	CAS	Level	YJYI	YJY2	YJY3	HYY1	HYY2	HYY3	VIP	Fold_Change	Log2FC	Type
pmn001691	C18H32O5	9,12,13-Trihyroxy-10,15-octadecadienoic acid	Lipids	Free fatty acids	-	A	8572.9	7470.3	10154	9	9	9	1.46679	0.00103064	-9.92224	down
pmb0128	C13H24O2	δ-Tridecalactone	Lipids	Glycerol ester	7370-92-5	B	5483.9	6562.2	5677.8	9	9	9	1.46697	0.00152337	-9.35852	down
Lmmp002755	C33H40O21	Quercetin-7-O-rutinoside-4'-O-glucoside	Flavonoids	Flavonols	-	B	58183	3666000	4022200	66745	41312	61198	1.04269	0.0218496	-5.51625	down
Xmyp004945	C33H40O20	Kaempferol-3-O-(6'''-Rhamnosyl-2'''-Glucosyl-Glucoside) (Camelliaside A)*	Flavonoids	Flavonoid	135095-52-2	A	151010	2233400	2844700	80941	97608	92451	1.15115	0.0518253	-4.2702	down
mws1012	C9H6O2	Coumarin	Lignans and Coumarins	Coumarins	91-64-5	A	8033.2	48797	42482	5192	4411.8	6399.7	1.17352	0.161143	-2.63358	down
Lmhp009773	C27H46O9	1-α-Linolenoyl-glycerol-glucoside*	Lipids	Glycerol ester	-	A	11134	19129	15401	2431	2883.3	2360.1	1.44042	0.168062	-2.57293	down
pmb0885	C18H26O3	4-O-9Z,11Z,13E,15E-octadecatetraenoic acid	Lipids	Glycerol ester	-	A	16642	21735	16464	5395.6	3577.9	3845.6	1.43585	0.23375	-2.09696	down
mws0574	C4H8O3	2-Hydroxyisobutyric acid	Organic acids	Organic acids	594-61-6	B	15335	15819	19431	4927.3	5941.7	6429.3	1.43708	0.341965	-1.54808	down
pme1261	C9H19NO4	Pantothenol	Others	Saccharides and Alcohols	16485-10-2	B	1305.2	2434.5	2775.4	2260.6	9	9	1.02576	0.349741	-1.51564	down
pme2268	C7H7NO2	Trigonelline	Alkaloids	Alkaloids	535-83-1	B	83990	74465	69446	22625	23873	34103	1.4164	0.353667	-1.49954	down
pme3011	C4H9NO2	γ-Aminobutyric acid*	Organic acids	Organic acids	1956-12-2	B	134160	181590	225290	63565	66838	65005	1.40365	0.361171	-1.46925	down
mws1060	C10H12N4O5	9-(Arabinofuranosyl)hypoxanthine	Nucleotides and derivatives	Nucleotides and derivatives	7013-16-3	A	66468	104980	56718	35293	39425	25898	1.28087	0.440977	-1.18122	down
mws0636	C18H20N2O3	Phe-Phe	Amino acids and derivatives	Amino acids and derivatives	2577-40-4	B	10402	8296.8	4666.5	2591.2	3085.8	4649.8	1.17545	0.441972	-1.17797	down
mws1293	C29H24O12	Theaflavin	Tannins	Proanthocyanidins	4670-5-7	A	390340	707430	702830	310230	250540	287740	1.27193	0.471237	-1.08547	down
mws0289	C23H46NO7P	LysoPE 18:1	Lipids	LPE	89576-29-4	A	246460	288370	249410	135010	119710	117200	1.44464	0.474243	-1.0763	down
pme1540	C28H32O16	Isorhamnetin-3-O-neohesperidoside*	Flavonoids	Flavonols	55033-90-4	A	42988	104670	101410	46146	34625	38737	1.08443	0.479821	-1.05943	down
pmp001280	C23H46NO7P	3-{[(2-Aminoethoxy)(hydroxy)phosphoryl]oxy}-2-hydroxypropyl-9,12-octadecenoate*	Alkaloids	Alkaloids	-	A	250330	277640	249970	129390	126210	118370	1.45714	0.480718	-1.05674	down
pmb2211	C19H38N2O3	Cocamidopropyl betaine	Alkaloids	Alkaloids	4292-10-8	A	35813	51716	65937	22135	21054	31660	1.24375	0.487724	-1.03586	down
Lmhp008440	C20H40NO7P	LysoPE 15:1	Lipids	LPE	-	B	3578.3	4810.1	3100.4	2072.4	1528	2064	1.32824	0.493037	-1.02023	down
mws0473	C5H8O4	2-Methylsuccinic acid*	Organic acids	Organic acids	498-21-5	A	519650	742030	944690	408060	342070	343740	1.29067	0.495778	-1.01223	down
mws1608	C21H20O11	Luteolin-6-C-glucoside (Isoorientin)*	Flavonoids	Flavonoid carbonoside	4261-42-1	B	20091	22613	39287	50898	40499	74397	1.16971	2.0221	1.01585	up
pmb1650	C18H30O2	Octadeca-11E,13E,15Z-trienoic acid	Lipids	Glycerol ester	25575-00-2	A	5615800	4050200	4678400	6731600	13441000	8896000	1.22719	2.02648	1.01897	up
pmn001384	C25H24O12	Isochlorogenic acid C	Phenolic acids	Phenolic acids	57378-72-0	B	1023400	1027500	1035400	2037200	2278700	1963900	1.45558	2.03473	1.02484	up
pmb0636	C26H28O15	Luteolin-8-C-glucoside-7-O-arabinoside	Flavonoids	Flavonoid carbonoside	-	B	23562	29294	32676	61144	56274	56761	1.41383	2.03642	1.02603	up
pmn001516	C14H14O9	5-Galloylshikimic acid*	Phenolic acids	Phenolic acids	95719-51-0	B	701540	697180	739810	1369900	1238900	1751700	1.40731	2.03902	1.02787	up
pme2246	C14H6O8	Ellagic acid	Tannins	Tannin	476-66-4	A	26151	14451	12323	37674	36704	34107	1.25773	2.04979	1.03547	up
Zmhn002783	C14H14O9	5-O-Galloylshikimic acid*	Phenolic acids	Phenolic acids	-	B	1454500	1458700	1498400	3084100	2768600	3241100	1.4548	2.06134	1.04358	up
pmb2791	C18H30O4	9-HpOTrE	Lipids	Glycerol ester	111004-08-1	B	34097	18097	25397	86413	43082	32230	1.02251	2.08433	1.05958	up
pmp001285	C8H4O3	Phthalic anhydride	Phenolic acids	Phenolic acids	85-44-9	A	524810	361230	398330	568500	1265000	845030	1.18267	2.08548	1.06038	up
Lmxp010913	C35H66NO9P	1-(9Z-Octadecenoyl)-2-(9-oxo-nonanoyl)-sn-glycero-3-phosphocholine	Lipids	Glycerol ester	-	A	10764	12961	9019.9	18020	22627	28526	1.33821	2.11248	1.07894	up
pmp000786	C18H16O7	Eupatorin*	Flavonoids	Flavonoid	855-96-9	B	46242	43236	36618	90119	91655	85838	1.44104	2.12229	1.08562	up
Zmlp007578	C17H12O8	3,3',4-Trimethoxy ellagic acid	Phenolic acids	Phenolic acids	-	B	99841	94312	84930	205410	210360	199500	1.45562	2.20461	1.14053	up
pmb0624	C27H30O16	Luteolin-6-C-glucoside-7-O-glucoside	Flavonoids	Flavonoid carbonoside	-	B	47833	57911	50306	126440	105460	119410	1.44053	2.25127	1.17074	up
pmn001525	C23H26O11	3,5-Di-O-galloylshikimic acid	Phenolic acids	Phenolic acids	95753-52-9	B	24399	26428	20673	54250	59938	46817	1.42275	2.25182	1.17109	up
Wmhn004451	C25H24O11	"1,4,8-Trihydroxynaphthalene-1-O-[6'-O-(3"",4"",5""-trimethylbenzoyl)]glucoside"	Quinones	Quinones	-	B	41330	58060	53237	123060	107450	114760	1.41846	2.26218	1.17771	up
pmb2789	C18H30O4	13S-Hydroperoxy-6Z,9Z,11E-octadecatrienoic acid	Lipids	Free fatty acids	121107-97-9	B	46316	18310	30174	122740	60321	43080	1.04635	2.38545	1.25426	up
Li512115	C25H24O12	3,4-Dicaffeoylquinic acid	Phenolic acids	Phenolic acids	14534-61-3	A	913640	1140000	898370	2635300	2631800	1881300	1.40065	2.42154	1.27592	up
pmn001628	C20H18O14	Hexahydroxydiphenoylglucose	Phenolic acids	Phenolic acids	-	A	1307400	1727900	1521200	3482000	4407000	3154300	1.40955	2.42364	1.27717	up
pmb0631	C26H28O15	Luteolin-8-C-glucoside-6-C-arabinoside*	Flavonoids	Flavonoid carbonoside	-	B	28017	21485	29180	66158	54422	77588	1.40348	2.51859	1.33262	up
pmn001382	C25H24O12	Isochlorogenic acid A	Phenolic acids	Phenolic acids	2450-53-5	A	928880	1093900	932940	2714800	2719400	2361500	1.45139	2.6375	1.39917	up
Lmsn002071	C34H26O22	Tellimagrandin I*	Tannins	Tannin	79786-08-6	B	59109	39765	32950	117010	139410	107050	1.37821	2.75724	1.46322	up
Zmhn005413	C15H12O9	m/p Dimeric galloyl methyl este*	Tannins	Tannin	-	A	1402200	1535600	1143600	4313100	4053000	3757700	1.44491	2.9705	1.57071	up
pmb2871	C13H16O9	2,5-Dihydroxy benzoic acid O-hexside	Phenolic acids	Phenolic acids	-	A	211100	271600	272900	796810	728530	771720	1.44921	3.04005	1.60409	up
Lmfn001258	C20H20O13	Maplexin D (2,4-Di-O-Galloyl-1,5-Anhydro-D-Glucitol)	Tannins	Tannin	1355573-86-2	B	94037	105030	107000	317450	291800	333600	1.46022	3.08053	1.62318	up
pmn001519	C15H12O9	Galloyl Methyl gallate*	Tannins	Tannin	-	A	365960	453240	370670	1163400	1365700	1152400	1.45006	3.09404	1.62949	up
pmn001367	C13H16O9	Protocatechuic acid-4-glucoside	Phenolic acids	Phenolic acids	-	A	197350	215700	283760	765550	777060	803460	1.44427	3.36687	1.75141	up
