# Supplementary material for: A Comparative Metabolomic Analysis Reveals Difference Manufacture Suitability in “Yinghong 9” and “Huangyu” Teas (Camellia sinensis)
Source: Front Plant Sci. 2021 Dec 14;12:767724. doi: 10.3389/fpls.2021.767724 (PMC8712721; doi:10.3389/fpls.2021.767724)
Supplement: Supplementary Table 2 — Differential metabolites between “Yinghong 9” fresh leaves and fermented leaves. [file Table_2.XLSX]

## Sheet: Sheet1
Index	Formula	Compounds	Class I	Class II	CAS	Level	YJYI	YJY2	YJY3	YJF1	YJF2	YJF3	VIP	Fold_Change	Log2FC	Type
Lmtp004126	C24H22O16	"Myricetin-3-O-(6""-malony)glucoside"	Flavonoids	Flavonols	-	B	98151	115600	140160	22180	17028	14860	1.12603	0.152773	-2.71054	down
Zmjn003358	C23H20O10	(-)-Epicatechin-3-(3''-O-methyl)gallate	Others	Others	-	B	675790	1020900	1162200	299160	318930	270590	1.09507	0.310848	-1.68572	down
Lmtn003096	C26H36O11	(-)-Secoisolariciresinol 4-O-glucoside	Lignans and Coumarins	Lignans	-	B	1534000	1321700	1414300	611880	573060	587600	1.13431	0.415115	-1.26842	down
Cmcp003396	C22H18O9	(+)-Afzelechin-3-O-gallate	Flavonoids	Flavanols	-	A	10540000	11202000	9636100	2683100	3063300	2546000	1.13481	0.264273	-1.9199	down
Lmmn003875	C21H24O7	(+)-Medioresinol	Lignans and Coumarins	Lignans	40957-99-1	B	13510	41273	22459	1660800	1912200	1605400	1.12786	67.0412	6.06698	up
Lmbn006152	C18H32O2	(9Z,11E)-Octadecadienoic acid	Lipids	Free fatty acids	2540-56-9	B	9475.3	9605.5	9906.6	49255	48023	49538	1.14091	5.06482	2.34051	up
Lmgn000224	C5H6O5	(S)-2-methyl-3-oxosuccinic acid	Organic acids	Organic acids	-	A	98620	84754	79572	31131	23571	28576	1.12227	0.316711	-1.65876	down
pmn001534	C34H28O22	1,2,3,6-Tetra-O-Galloyl-D-Glucose*	Phenolic acids	Phenolic acids	79886-50-3	B	287500	228870	174440	47206	53928	44040	1.11774	0.21015	-2.25051	down
pmn001523	C21H14O13	1,3-Trigallic acid*	Phenolic acids	Phenolic acids	-	B	669270	428770	398490	9	9	9	1.14056	1.80417e-05	-15.7583	down
Wmhn001495	C20H20O14	1,4-Di-O-galloyl-glcose	Tannins	Tannin	-	A	13381000	12440000	13195000	4491700	5067300	4883000	1.13724	0.370156	-1.4338	down
pme2529	C6H12O5	1,5-Anhydro-D-glucitol	Others	Saccharides and Alcohols	154-58-5	B	78360	60241	79203	192420	146820	155270	1.09459	2.27044	1.18297	up
pmn001526	C20H20O14	1,6-Di-O-Galloyl-D-Glucose*	Phenolic acids	Phenolic acids	-	B	1248700	990970	1052400	465440	453350	427060	1.12523	0.408816	-1.29048	down
pmn001686	C16H32O4	10,16-Dihydroxypalmitic acid	Lipids	Free fatty acids	3233-90-7	A	3048.7	4770.9	3828.9	39576	32275	39325	1.1317	9.54423	3.25463	up
mws2623	C18H34O2	11-Octadecanoic acid(Vaccenic acid)	Lipids	Free fatty acids	506-17-2	A	713330	930970	1024000	4084500	4199600	4354700	1.1295	4.73665	2.24387	up
pmb2799	C18H32O3	12,13-Epoxy-9-Octadecenoic Acid	Lipids	Free fatty acids	6799-85-5	B	11437	10088	10682	28326	28837	28200	1.13813	2.65045	1.40624	up
Lmbn005369	C18H32O3	13(S)-HODE;13(S)-Hydroxyoctadeca-9Z,11E-dienoic acid	Lipids	Free fatty acids	10219-69-9	B	214300	236460	224630	6408500	6084100	6331600	1.14095	27.8716	4.80072	up
pmb2804	C18H32O4	13-HPODE*	Lipids	Glycerol ester	33964-75-9	B	36626	36195	36654	652910	621650	585730	1.14095	16.9928	4.08685	up
Lmbn005443	C18H30O3	13-KODE; (9Z,11E)-13-Oxooctadeca-9,11-dienoic acid	Lipids	Free fatty acids	54739-30-9	B	6383.9	3161.9	2265.7	103710	106090	102050	1.12369	26.4022	4.72259	up
Rfmb087	C18H32O4	13-Oxo-9-hydroxy-10-octadecenoic acid*	Lipids	Free fatty acids	-	B	16739	15377	15659	451810	426170	416140	1.14102	27.0878	4.75957	up
pmb2789	C18H30O4	13S-Hydroperoxy-6Z,9Z,11E-octadecatrienoic acid	Lipids	Free fatty acids	121107-97-9	B	46316	18310	30174	199960	232670	182350	1.09756	6.48713	2.69758	up
pmf0297	C20H42O	1-Eicosanol	Lipids	Glycerol ester	629-96-9	B	15381	17091	14937	38316	34013	32439	1.12678	2.20988	1.14397	up
pme3200	C2H7N3	1-methylguanidine	Nucleotides and derivatives	Nucleotides and derivatives	471-29-4	B	22387	27463	27578	54161	53490	59764	1.11838	2.1622	1.1125	up
pme0181	C7H11N3O2	1-Methylhistidine	Amino acids and derivatives	Amino acids and derivatives	368-16-1	A	875720	951330	946990	311550	350100	310380	1.13681	0.350402	-1.51292	down
pmn001420	C15H18O9	1-O-[(E)-Caffeoyl]-D-glucose	Phenolic acids	Phenolic acids	-	B	1301600	1194700	1032400	493690	544860	621140	1.1062	0.47034	-1.08822	down
pmn001518	C13H16O10	1-O-Galloyl-D-glucose*	Phenolic acids	Phenolic acids	58511-73-2	A	5959000	6470800	6647700	2020300	2161500	1904900	1.13729	0.319051	-1.64814	down
Lmhp011562	C21H36O4	1-α-Linolenoyl-glycerol	Lipids	Glycerol ester	-	A	645580	646690	687020	190240	193170	189660	1.14066	0.289533	-1.7882	down
pme3083	C8H7NO3	2-(Formylamino)benzoic acid	Phenolic acids	Phenolic acids	3342-77-6	A	6845.5	23153	16385	253110	225600	227690	1.10457	15.2296	3.9288	up
pmp001276	C33H56O14	2,3-Dihydroxypropyl-9,12,15-octadecatrienoate-hexose-hexose	Lipids	Free fatty acids	-	A	843780	917070	958130	3442000	3389200	3428300	1.13914	3.77329	1.91582	up
Lmfn000797	C20H20O14	2,3-Di-O-Galloyl-D-Glucose*	Tannins	Tannin	-	A	203910	199320	173360	11678	14875	14043	1.13862	0.070407	-3.82814	down
Xmbp001692	C7H6O5	2,4,6-Trihydroxybenzoic acid	Organic acids	Organic acids	-	A	3236900	2671600	3124100	9	9	9	1.14114	2.98917e-06	-18.3518	down
pmb0302	C2H8NO3P	2-Aminoethylphosphonate	Lipids	Glycerol ester	2041-14-7	A	122190	87642	95626	44994	51374	40741	1.0918	0.448864	-1.15565	down
pme3017	C4H9NO2	2-Aminoisobutyric acid	Amino acids and derivatives	Amino acids and derivatives	62-57-7	B	4062700	4810000	5160800	12161000	11812000	12018000	1.12777	2.56465	1.35876	up
pmb2507	C5H11O7P	2-Deoxyribose-1-phosphate	Nucleotides and derivatives	Nucleotides and derivatives	17210-42-3	B	173460	148430	199880	488490	424810	403010	1.11388	2.52278	1.33501	up
Cmln001085	C12H23NO10S2	2-Hydroxy-2-Methylbutyl Glucosinolate	Others	Glucosinolates	36286-64-3	B	1262800	1174700	1225000	205090	338230	281210	1.1204	0.225128	-2.15118	down
pmp001274	C28H48NO7P	2-Hydroxy-5,8,11,14,17-icosapentaenoyloxy]propyl-2-(trimethylammonio)ethyl phosphate	Alkaloids	Alkaloids	-	B	300560	365270	334480	3357500	3225900	3251400	1.13964	9.83175	3.29745	up
Lmmn001643	C9H8O3	2-Hydroxycinnamic acid*	Organic acids	Organic acids	583-17-5	A	71036	110280	63211	1513900	1455900	1451600	1.13365	18.0814	4.17644	up
Lmmn003323	C16H32O3	2-Hydroxyhexadecanoic acid	Organic acids	Organic acids	764-67-0	B	131520	105720	108140	472770	487890	466690	1.13599	4.13269	2.04708	up
mws0574	C4H8O3	2-Hydroxyisobutyric acid	Organic acids	Organic acids	594-61-6	B	15335	15819	19431	58576	50587	49073	1.1263	3.12812	1.6453	up
pmb3101	C7H12O5	2-Isopropylmalate	Organic acids	Organic acids	-	A	10180000	9981900	8747600	3932300	3950000	4034900	1.13403	0.412224	-1.2785	down
mws0473	C5H8O4	2-Methylsuccinic acid*	Organic acids	Organic acids	498-21-5	A	519650	742030	944690	1807700	1705400	1752900	1.06235	2.38673	1.25503	up
pme1216	C6H5NO2	2-Picolinic acid*	Organic acids	Organic acids	98-98-6	A	54200	75504	52548	253600	270390	222670	1.12275	4.09685	2.03452	up
Zmyn005384	C18H36O3	2R-Hydroxyoctadecanoic Acid	Lipids	Free fatty acids	26633-48-7	B	8234.6	6808.7	6096.6	26309	30117	30844	1.13033	4.12821	2.04552	up
Lmhp009526	C27H46O9	2-γ-Linolenoyl-glycerol-glucoside	Lipids	Glycerol ester	-	A	10627	10542	10127	23207	23408	18376	1.11423	2.07666	1.05426	up
mws0467	C9H10O3	3-(4-Hydroxyphenyl)-propionic acid	Phenolic acids	Phenolic acids	501-97-3	B	1831.5	2398	604.5	38046	44439	38006	1.1072	24.9257	4.63956	up
Cmcp001482	C30H26O14	3,3',4',5,5',7-Hexahydroxyflavan(4→8)-3,3',4',5,5',7-hexahydroxyflavan;(2R,2'R,3S,3'R,4S)-form	Flavonoids	Biflavones	68964-95-4	B	25367000	29582000	29603000	379450	520030	519670	1.13956	0.0167843	-5.89674	down
Cmcp002323	C37H30O17	3,3',4',5,5',7-Hexahydroxyflavan(4→8)-3,3',4',5,5',7-hexahydroxyflavan;(all-R)-form,3''-Deoxy,3'-O-(3,4,5-trihydroxybenzoyl)	Flavonoids	Biflavones	126715-89-7	B	8044200	8792700	8326500	582330	942390	734740	1.13383	0.0897915	-3.47728	down
Cmcp002716	C21H20O13	3,3',4',5,5',7-Hexahydroxyflavone;3'-O-β-D-Glucopyranoside	Flavonoids	Flavonoid	520-14-9	A	8786000	7979200	8926300	1609200	2124900	1706800	1.13361	0.211778	-2.23937	down
Cmcp003418	C44H34O20	3,3',4',5,7-Pentahydroxyflavan-(4→6)-3,3',4',5,7-pentahydroxyflavan;(2R,2'R,3R,3'R,4R)-form,3,3'-Bis-O-(3,4,5-trihydroxybenzoyl)	Flavonoids	Biflavones	106533-60-2	B	1120400	923220	1103300	341080	425850	379400	1.12397	0.36427	-1.45692	down
Cmcp003078	C44H34O21	3,3',4',5,7-Pentahydroxyflavan(4→6)-3,3',4',5,7-pentahydroxyflavan;(2R,2'R,3R,3'R,4R)-form,5''-Hydroxy,3,3'-bis-O-(3,4,5-trihydroxybenzoyl)	Flavonoids	Biflavones	126715-92-2	B	522030	570730	587090	49575	71992	58452	1.13573	0.107164	-3.22211	down
Cmcp002861	C44H34O20	3,3',4',5,7-Pentahydroxyflavan(4→8)-3,3',4',5,7-pentahydroxyflavan;(2R,2'R,3R,3'R,4R)-form,3,3'-Bis-O-(3,4,5-trihydroxybenzoyl)	Flavonoids	Biflavones	79907-44-1	B	725670	822080	648330	284580	359450	337140	1.10908	0.446782	-1.16236	down
Cmcp003380	C23H20O10	3,3',4',5,7-Pentahydroxyflavan;(2R,3R)-form,3-O-(3,4-Dihydroxy-5-methoxybenzoyl)	Flavonoids	Flavanols	83104-86-3	B	787530	992550	1241900	359680	318240	304760	1.10707	0.325178	-1.6207	down
Lmgp004167	C15H14O6	3',4,4',5,7-Pentahydroxyflavan (Luteoforol)	Flavonoids	Flavonoid	13392-26-2	B	13534000	12631000	13068000	1378500	1363200	1525400	1.14039	0.108763	-3.20074	down
Cmcp002131	C44H34O19	3,4',5,7-Tetrahydroxyflavan(4→6)-3,3',4',5,7-pentahydroxyflavan;(all-R)-form,3,3''-Bis-O-(3,4,5-trihydroxybenzoyl)	Flavonoids	Biflavones	252185-32-3	B	5858100	5316900	5549700	2298400	2495200	2417100	1.13678	0.431141	-1.21377	down
Li512115	C25H24O12	3,4-Dicaffeoylquinic acid	Phenolic acids	Phenolic acids	14534-61-3	A	913640	1140000	898370	403270	534490	475280	1.09232	0.47867	-1.0629	down
Hmgn001653	C7H6O3	3,4-Dihydroxybenzaldehyde	Phenolic acids	Phenolic acids	139-85-5	B	115780	147840	103650	619920	701860	658570	1.1316	5.39208	2.43084	up
pmb2620	C11H12O4	3,4-Dimethoxycinnamic acid	Phenolic acids	Phenolic acids	14737-89-4	B	239900	163910	202610	3226.8	3306.8	3985.9	1.13879	0.0173469	-5.84918	down
Lmtp003948	C22H24O12	3',5',5,7-Tetrahydroxy-4'-methoxyflavanone-3'-O-glucoside	Flavonoids	Flavonoid	-	B	9258600	8502100	8327800	1534500	1904300	1587600	1.13655	0.192667	-2.37582	down
pmn001525	C23H26O11	3,5-Di-O-galloylshikimic acid	Phenolic acids	Phenolic acids	95753-52-9	B	24399	26428	20673	9	9	9	1.14095	0.000377622	-11.3708	down
pmp001277	C21H44NO7P	3-{(2-Aminoethoxy)(hydroxy)phosphoryl]oxy}-2-hydroxypropyl palmitate*	Alkaloids	Alkaloids	-	B	2554600	2870300	2809500	9539300	9857600	9459800	1.13888	3.50441	1.80917	up
mws0874	C10H14N5O7P	3'-Adenylic Acid*	Nucleotides and derivatives	Nucleotides and derivatives	84-21-9	B	16204	25493	20881	195850	235100	258540	1.13151	11.0181	3.4618	up
mws0444	C7H7NO3	3-Aminosalicylic acid	Phenolic acids	Phenolic acids	570-23-0	B	4243.1	7468.9	6302.2	52158	38173	36086	1.11721	7.01763	2.81098	up
ML10176345	C7H8O5	3-Dehydroshikimic acid	Organic acids	Organic acids	2922-42-1	B	475210	377360	428600	1580200	1453500	1123500	1.11751	3.24485	1.69815	up
pme2914	C6H10O5	3-Hydroxy-3-methylpentane-1,5-dioic acid	Amino acids and derivatives	Amino acids and derivatives	503-49-1	B	448110	482370	466730	984790	1024500	1102400	1.13546	2.22707	1.15515	up
Lmbn002739	C9H8O3	3-Hydroxycinnamic Acid*	Phenolic acids	Phenolic acids	14755-02-3	B	615630	714260	847370	9	9	9	1.14112	1.24009e-05	-16.2992	down
pmp001275	C31H61O14N	3-Hydroxypropyl palmitate glc-glucosamine	Alkaloids	Alkaloids	-	A	268260	296610	318940	1259900	1038800	1301000	1.13244	4.07293	2.02607	up
pmb0819	C10H8N2	3-Indoleacetonitrile	Alkaloids	Plumerane	771-51-7	B	12641	11494	12104	38787	41586	37843	1.13873	3.26212	1.70581	up
pme2244	C11H11NO2	3-Indolepropionic acid	Alkaloids	Plumerane	830-96-6	B	21222	16091	20364	43433	35184	37931	1.09371	2.0207	1.01486	up
Lmmn004145	C38H60O10	3-O-(2-O-Acetyl-glucosyl)oleanolic acid	Terpenoids	Triterpene	-	B	175140	171940	197980	710010	660840	706120	1.13787	3.81053	1.92999	up
Cmcp002903	C23H20O11	3-O-(3,4-Dihydroxy-5-methoxybenzoyl)3,3',4',5,5',7-Hexahydroxyflavan	Flavonoids	Flavanols	-	A	732190	1489000	1628500	36486	16284	30559	1.12273	0.0216456	-5.52978	down
Zmhn003297	C21H20O14	3-O-Digalloyl quinic acid	Phenolic acids	Phenolic acids	-	B	16551000	14757000	15378000	4038600	4696500	4577200	1.13645	0.285145	-1.81023	down
pme0309	C8H8O5	3-O-Methylgallate	Tannins	Tannin	99-24-1	A	797010	739750	762550	47085	45130	32291	1.13719	0.0541493	-4.20691	down
Hmtp000776	C8H9NO3	4,5,6-Trihydroxy-2-cyclohexen-1-ylideneacetonitrile	Alkaloids	Alkaloids	-	B	131630	125720	136280	2588900	2682600	2596200	1.14099	19.9876	4.32103	up
pmp000004	C17H14O7	4',5,7-Trihydroxy-3',6-dimethoxyflavone (Jaceosidin)	Flavonoids	Flavonoid	18085-97-7	B	125710	131880	129340	975270	1049900	967450	1.14065	7.73427	2.95126	up
mws1336	C7H7NO2	4-Aminobenzoic acid	Phenolic acids	Phenolic acids	150-13-0	B	611990	600240	583330	8805.9	12728	8303.7	1.13882	0.0166174	-5.91116	down
mws0749	C7H6O3	4-Hydroxybenzoic acid	Phenolic acids	Phenolic acids	99-96-7	B	104000	86188	70251	22158	21089	26356	1.11803	0.267253	-1.90372	down
HJN037	C8H8O5	4-Methoxy-3,5-dihydroxybenzoic acid	Phenolic acids	Phenolic acids	-	B	757310	674430	526000	32345	46864	31525	1.13337	0.0565622	-4.14402	down
pmb2795	C10H10O3	4-Methoxycinnamic acid	Phenolic acids	Phenolic acids	830-09-1	B	769730	618330	716960	35621	41498	40785	1.13941	0.0560109	-4.15815	down
Lmbn002644	C8H8O	4-Methylbenzaldehyde	Others	Others	104-87-0	B	9	9	9	45413	40968	49260	1.14111	5023.74	12.2945	up
pme2828	C6H5NO3	4-Nitrophenol	Phenolic acids	Phenolic acids	100-02-7	B	47172000	47029000	50580000	17065000	16234000	15638000	1.13894	0.338007	-1.56487	down
pmb0885	C18H26O3	4-O-9Z,11Z,13E,15E-octadecatetraenoic acid	Lipids	Glycerol ester	-	A	16642	21735	16464	45724	37483	38488	1.10069	2.21905	1.14994	up
Zmhn000892	C13H18O8	4-O-Glucosyl-3,4-dihydroxybenzyl alcohol	Phenolic acids	Phenolic acids	-	B	496030	573770	539200	188840	192880	176620	1.13638	0.347011	-1.52695	down
Hmtn001120	C14H20O8	5-(2-Hydroxyethyl)-2-O-glucosylohenol*	Phenolic acids	Phenolic acids	-	B	89697	153380	146140	17156	16000	19898	1.12266	0.13631	-2.87504	down
Hmqn003268	C15H12O7	5,7,3',4',5'-Pentahydroxydihydroflavone	Flavonoids	Dihydroflavone	-	B	3697800	9405700	4648300	393810	341960	281880	1.11624	0.0573266	-4.12465	down
Lmgp004731	C21H20O10	5,7,4'-Trihydroxyisoflavone-7-O-galactoside*	Flavonoids	Isoflavones	-	A	1572200	1779300	1534700	368150	326230	341430	1.13792	0.211987	-2.23795	down
Zmhn001102	C14H16O8	5,7-Dihydroxy-1(3H)-isobenzofuran-one-O-glucoside	Others	Others	-	B	122810	84687	151730	890110	1121100	744230	1.11822	7.67047	2.93932	up
pma3649	C5H9NO3	5-Aminolevulinate	Alkaloids	Alkaloids	106-60-5	B	86004	103270	107820	1900500	1825900	1698000	1.13943	18.2582	4.19047	up
Hmln002355	C27H34O12	5'-Methoxymatairesinoside	Lignans and Coumarins	Lignans	1691201-82-7	B	72329	54922	61895	21528	32433	31528	1.06561	0.451974	-1.14569	down
Hmln002806	C16H16O8	5-O-Caffeoylshikimic acid	Phenolic acids	Phenolic acids	180981-12-8	B	91538	94910	73554	37261	38564	28237	1.09942	0.400235	-1.32108	down
pmb3066	C22H26O12	5-O-p-Coumaroyl shikimic acid O-hexoside	Phenolic acids	Phenolic acids	-	B	175210	158860	182680	5430.7	4256.4	4252.2	1.13967	0.0269749	-5.21224	down
Zmhp003514	C16H12O6	6,7,8-Tetrahydroxy-5-methoxyflavone	Flavonoids	Flavonoid	-	B	20226	21752	21462	69503	57626	59895	1.13396	2.94805	1.55976	up
pme0274	C6H13NO2	6-Aminocaproic acid	Organic acids	Organic acids	60-32-2	B	310350	308350	306080	5177300	5171900	4824800	1.14106	16.4082	4.03635	up
pmp001198	C6H13NO2	6-Deoxyfagomine*	Alkaloids	Alkaloids	197449-09-5	A	1328900	1378900	1409600	14556000	14815000	14585000	1.14099	10.6757	3.41625	up
mws0972	C6H12O3	6-Hydroxyhexanoic acid	Organic acids	Organic acids	1191-25-9	B	10003	15448	8468.5	44790	36961	31282	1.08172	3.33239	1.73656	up
pmp001310	C27H30O17	6-Hydroxykaempferol-3,6-O-Diglucoside*	Flavonoids	Flavonols	-	B	164540	175700	214540	576200	405260	658610	1.08998	2.95625	1.56377	up
pmc0274	C6H6N4S	6-Methylmercaptopurine	Nucleotides and derivatives	Nucleotides and derivatives	50-66-8	B	759150	770810	771950	14650000	14833000	14144000	1.14112	18.9525	4.24432	up
Zmhn001793	C15H18O9	6-O-Caffeoyl-D-glucose	Phenolic acids	Phenolic acids	-	B	3506500	3436500	3619600	605140	730060	680990	1.13872	0.19088	-2.38926	down
Lmbn005287	C18H32O4	7S,8S-DiHODE; (9Z,12Z)-(7S,8S)-Dihydroxyoctadeca-9,12-dienoic acid	Lipids	Free fatty acids	143288-65-7	B	22949	22962	26098	63193	57292	68139	1.13036	2.61945	1.38926	up
pmb2636	C20H32O4	8,15-DiHETE	Lipids	Glycerol ester	77667-08-4	B	9	9	9	152600	150520	145400	1.14119	16611.9	14.0199	up
Lmmp003672	C31H28O12	8,8'-Methylenebiscatechin	Flavonoids	Flavanols	81555-08-0	B	156690	171870	147460	28656	31197	35903	1.13569	0.20116	-2.31359	down
mws1060	C10H12N4O5	9-(Arabinofuranosyl)hypoxanthine	Nucleotides and derivatives	Nucleotides and derivatives	7013-16-3	A	66468	104980	56718	474980	498130	554800	1.11985	6.69648	2.7434	up
pmn001694	C18H34O5	9,10,13-Trihyroxy-11-octadecadienoic acid	Lipids	Free fatty acids	-	A	53248	43841	46117	1077600	1053700	1026300	1.14049	22.0494	4.46266	up
pmn001691	C18H32O5	9,12,13-Trihyroxy-10,15-octadecadienoic acid	Lipids	Free fatty acids	-	A	8572.9	7470.3	10154	444780	430270	412000	1.13986	49.1293	5.61851	up
Zmjn004133	C18H32O4	9-HpODE*	Others	Others	5502-91-0	B	10940	7655.6	9007.6	386140	374230	377120	1.1396	41.2086	5.36487	up
pmb2791	C18H30O4	9-HpOTrE	Lipids	Glycerol ester	111004-08-1	B	34097	18097	25397	198550	216540	191390	1.12377	7.81637	2.9665	up
pmb2787	C18H30O3	9-Oxo-10E,12Z-octadecadienoic acid	Lipids	Free fatty acids	54232-59-6	B	8181.9	6059.8	6319.3	117180	125430	115130	1.13879	17.399	4.12093	up
Rfmb091	C18H32O3	9S-Hydroxy-10E,12Z-octadecadienoic acid	Lipids	Free fatty acids	15514-85-9	A	176990	178050	173990	6209100	6005700	5769300	1.14113	33.9945	5.08723	up
Lmtn004049	C15H20O4	Abscisic acid	Organic acids	Organic acids	21293-29-8	B	371970	346170	365550	4113800	4163000	3915400	1.1409	11.2506	3.49193	up
pme0040	C5H5N5	Adenine	Nucleotides and derivatives	Nucleotides and derivatives	73-24-5	A	2002900	3646400	2279000	52819000	52541000	52423000	1.13287	19.9012	4.31479	up
pme2117	C10H15N5O10P2	Adenosine 5'-Diphosphate	Nucleotides and derivatives	Nucleotides and derivatives	58-64-0	A	118270	104780	92165	29078	37504	36848	1.1197	0.328125	-1.60768	down
pme3285	C15H14O5	Afzelechin(3,5,7,4'-Tetrahydroxyflavan)	Flavonoids	Flavanols	2545-00-8	A	189220	189180	170570	28414	28043	26786	1.14007	0.151635	-2.72133	down
mws5037	C9H18N2O3	Alanylleucine	Amino acids and derivatives	Amino acids and derivatives	1999-42-4	B	34190	29825	37742	9	9	9	1.14107	0.000265338	-11.8799	down
pme1173	C5H4N4O	Allopurinol	Nucleotides and derivatives	Nucleotides and derivatives	315-30-0	B	26370	33208	24826	100770	104140	84832	1.12398	3.4328	1.77939	up
pmb2654	C19H27NO12	Anthranilate O-hexosyl-O-hexoside	Phenolic acids	Phenolic acids	-	B	280730	292860	304180	64981	83852	78030	1.13389	0.258454	-1.95202	down
Lmgp004784	C15H14O5	Apiferol	Flavonoids	Flavonoid	-	A	4714700	5360700	4913700	408670	524620	441690	1.13864	0.091732	-3.44643	down
pmp000571	C15H10O5	Apigenin*	Flavonoids	Flavonoid	520-36-5	A	9119.7	8224.7	8714.4	39372	40232	37729	1.14003	4.50262	2.17077	up
pmp000237	C26H26O15	Apigenin-6-C-2-glucuronylxyloside	Flavonoids	Flavonoid carbonoside	-	A	216660	208200	202730	35109	87208	49514	1.06409	0.273795	-1.86883	down
pmn001492	C11H8O3	Ayapin	Lignans and Coumarins	Coumarins	494-56-4	B	23353	23626	28219	46109	58258	55216	1.10634	2.12217	1.08554	up
Cmjn004337	C18H26O10	Benzyl-(2''-O-xylosyl)glucoside	Phenolic acids	Phenolic acids	-	B	73868	62028	63527	9252	14645	11082	1.12614	0.175401	-2.51127	down
Hmjn003484	C24H38O4	Bis(2-ethylhexyl)phthalate	Phenolic acids	Phenolic acids	-	B	9	9	9	27137	28694	26508	1.14117	3049.59	11.5744	up
pmp001279	C21H48N3O9P	Bis(N,N-diethylethanaminium)-2-acetamido-1,5-anhydro-2-deoxy-1-[-hydroxy(phosphonato)methyl]-D-glucitol	Alkaloids	Alkaloids	-	B	678320	782640	756300	9342900	9345800	8718000	1.14022	12.3606	3.62768	up
mws2212	C9H8O4	Caffeic acid	Phenolic acids	Phenolic acids	331-39-5	A	27607	38924	31245	996120	1296100	1065800	1.13804	34.344	5.10199	up
pmb0142	C9H8O3	Caffeic aldehyde	Phenolic acids	Phenolic acids	141632-15-7	B	372360	164670	220810	38640	35637	38481	1.10369	0.148789	-2.74866	down
Lmhn001773	C19H13NO10	Caffeoylnicotinoyltartaric acid	Phenolic acids	Phenolic acids	-	B	121770	126510	104440	9	9	9	1.14107	7.6548e-05	-13.6733	down
mws0054	C15H14O6	Catechin	Flavonoids	Flavanols	154-23-4	A	2200600	2637600	2539900	823450	864570	801700	1.1348	0.337447	-1.56727	down
pmn001416	C24H20O9	Catechin-(7,8-bc)-4α-(3,4-dihydroxyphenyl)-dihydro-2-(3H)-one	Flavonoids	Flavanols	-	B	1104500	1374000	1316900	348150	434540	330820	1.1248	0.293384	-1.76914	down
pmb2947	C45H38O18	Catechin-catechin-catechin*	Flavonoids	Flavanols	-	A	2607500	1764800	2777700	460330	514370	412290	1.12092	0.193985	-2.36599	down
pmb0680	C36H36O17	C-Hexosyl-apigenin O-p-coumaroylhexoside	Flavonoids	Flavonoid carbonoside	-	B	41799	60567	64084	21850	15393	20594	1.08513	0.347474	-1.52502	down
mws0178	C16H18O9	Chlorogenic acid*	Phenolic acids	Phenolic acids	327-97-9	A	330550	263670	281960	111770	126830	107190	1.12259	0.394656	-1.34133	down
Lmyp005841	C21H20O9	Chrysin-7-O-glucoside	Flavonoids	Flavonoid	-	B	8177.3	10075	8773	1893	2606.5	3367.3	1.09888	0.29109	-1.78046	down
pmp001127	C16H12O6	Chrysoeriol	Flavonoids	Flavonoid	491-71-4	B	20981	20946	22316	68586	73895	71866	1.13956	3.3365	1.73834	up
pmb3012	C22H22O11	Chrysoeriol-7-O-glucoside	Flavonoids	Flavonoid	19993-32-9	B	53496	44808	61284	13212	7513.2	8828.8	1.11347	0.185189	-2.43293	down
mws0383	C17H32O2	Cis-10-Heptadecenoic Acid	Lipids	Free fatty acids	29743-97-3	A	259970	476660	384780	848860	688730	949840	1.02329	2.21813	1.14934	up
mws0009	C10H10O3	Coniferaldehyde	Phenolic acids	Phenolic acids	20649-42-7	A	19631	21960	16955	122160	135170	137900	1.13695	6.75076	2.75505	up
mws0093	C10H12O3	Coniferyl alcohol	Phenolic acids	Phenolic acids	458-35-5	B	145590	153360	162730	932090	1006300	1208600	1.13662	6.81639	2.76901	up
Lmbn005923	C18H30O2	Crepenynic acid	Lipids	Free fatty acids	2277-31-8	B	90767	94391	88242	350180	357900	349950	1.14068	3.8699	1.9523	up
pme1777	C27H31O16+	Cyanidin-3,5-O-diglucoside (Cyanin)*	Flavonoids	Anthocyanins	2611-67-8	B	23895000	24012000	28774000	378980	590280	510530	1.13845	0.019298	-5.6954	down
Zmcp002924	C27H31O16+	Cyanidin-3-O-(2''-O-glucosyl)glucoside	Flavonoids	Anthocyanins	38820-68-7	B	17544000	16447000	17704000	355350	352350	390200	1.14096	0.021238	-5.55721	down
Lmjp002491	C35H35O17+	Cyanidin-3-O-(6''-O-p-coumaroyl-2''-O-xylosyl)glucoside	Flavonoids	Anthocyanins	-	B	47527	36991	37088	280810	155420	241690	1.11263	5.57472	2.4789	up
pmf0027	C21H21O11+	Cyanidin-3-O-galactoside*	Flavonoids	Anthocyanins	142506-26-1	B	1045200	1606000	1633100	302940	364750	340710	1.11601	0.235371	-2.08699	down
pmb0550	C21H21O11+	Cyanidin-3-O-glucoside (Kuromanin)	Flavonoids	Anthocyanins	47705-70-4	B	1079900	1717600	1646900	376930	356320	327380	1.11585	0.238644	-2.06707	down
pme1773	C27H31O15+	Cyanidin-3-O-rutinoside (Keracyanin)	Flavonoids	Anthocyanins	28338-59-2	A	4904700	5120300	5517100	285040	414610	258130	1.1351	0.0616249	-4.02034	down
mws0884	C10H12N5O6P	Cyclic AMP	Nucleotides and derivatives	Nucleotides and derivatives	60-92-4	A	18122	45439	21494	16542000	16261000	13215000	1.13637	541.038	9.07959	up
pme3732	C9H13N3O5	Cytidine	Nucleotides and derivatives	Nucleotides and derivatives	65-46-3	A	557800	669490	568460	15734000	18797000	17700000	1.13988	29.0859	4.86225	up
pme3174	C9H14N3O8P	Cytidine 5'-monophosphate(Cytidylic acid)	Nucleotides and derivatives	Nucleotides and derivatives	63-37-6	B	21469	28633	26182	254260	160370	181970	1.12721	7.82077	2.96731	up
mws0255	C4H5N3O	Cytosine	Nucleotides and derivatives	Nucleotides and derivatives	71-30-7	A	262900	400530	232880	2633600	3125000	3219100	1.12838	10.0163	3.32428	up
mws1499	C5H10O5	D-(-)-Arabinose	Others	Saccharides and Alcohols	10323-20-3	B	236460	223620	230680	494490	517730	529240	1.13886	2.23154	1.15804	up
pmb2653	C24H42O20	D(+)-Melezitose O-rhamnoside	Others	Saccharides and Alcohols	-	B	478630	506300	673990	105810	124480	114860	1.12949	0.208057	-2.26495	down
pme0500	C18H32O16	D-(+)-Melezitose*	Others	Saccharides and Alcohols	597-12-6	B	96376	252870	215090	48788	40465	44148	1.04438	0.236386	-2.08078	down
pme0519	C12H22O11	D-(+)-Sucrose*	Others	Saccharides and Alcohols	57-50-1	A	3754300	4417300	4091700	384300	372920	308050	1.13858	0.0868665	-3.52506	down
pme1398	C21H21O12+	Delphinidin-3-O-glucoside (Mirtillin)	Flavonoids	Anthocyanins	50986-17-9	B	327800	553090	545280	77157	88250	85299	1.11854	0.17579	-2.50808	down
pme3961	C10H13N5O3	Deoxyadenosine*	Nucleotides and derivatives	Nucleotides and derivatives	958-09-8	A	491570	568480	479400	9076.6	6631.9	7319.3	1.13962	0.0149585	-6.06289	down
pme1730	C4H6O4	D-Erythronolactone	Organic acids	Organic acids	15667-21-7	B	999590	817650	821900	21677	23696	21282	1.14015	0.0252563	-5.30721	down
mws1164	C6H12O6	D-Fructose	Others	Saccharides and Alcohols	7660-25-5	A	1901900	1805000	1762200	5864700	6907300	7046800	1.13582	3.62378	1.85749	up
Zmpn000199	C6H10O8	D-Galactaric acid	Others	Saccharides and Alcohols	526-99-8	B	749730	760990	724920	1571700	1592500	1408600	1.13375	2.04541	1.03239	up
mws0866	C6H13O9P	D-Glucose 6-phosphate*	Others	Saccharides and Alcohols	56-73-5	A	4045800	4249500	4108100	1539500	1591700	1584300	1.14052	0.380178	-1.39525	down
mws4170	C6H12O6	D-Glucose*	Others	Saccharides and Alcohols	14431-43-7	A	1531800	1781600	1635600	5768200	6173800	5793600	1.13765	3.58367	1.84144	up
mws4175	C6H8O6	D-Glucurono-6,3-lactone*	Others	Others	32449-92-6	B	9	9	9	184360	185700	192860	1.14119	20848.9	14.3477	up
Wmhn001788	C34H26O22	Digalloyl-HHDP-glucose	Tannins	Tannin	-	B	9	9	9	84097	76374	82795	1.14118	9009.85	13.1373	up
pme2710	C12H20O3	Dihydrojasmonic acid	Organic acids	Organic acids	3572-64-3	B	9	9	9	8569.2	7202.5	7109.6	1.14105	847.456	9.72699	up
Lmmn004625	C21H22O11	Dihydrokaempferol-7-O-glucoside*	Flavonoids	Flavonols	-	B	197030	210670	285430	93215	96723	103830	1.10017	0.423828	-1.23845	down
mws0744	C15H12O8	Dihydromyricetin(Ampelopsin)	Flavonoids	Dihydroflavonol	27200-12-0	A	497880	538150	516390	20723	30759	38729	1.13225	0.0581099	-4.10507	down
HJN104	C21H22O13	Dihydromyricetin-3-O-glucoside	Flavonoids	Dihydroflavonol	-	B	8755.5	12996	14943	50132	36579	38888	1.09225	3.42283	1.77519	up
mws0044	C15H12O7	Dihydroquercetin(Taxifolin)	Flavonoids	Dihydroflavonol	480-18-2	A	1269100	1212700	1189600	299910	342890	328500	1.13872	0.264558	-1.91834	down
Zmhn000785	C19H32O16	Di-O-Glucosylquinic acid	Phenolic acids	Phenolic acids	-	B	756120	541480	707950	81608	67042	49202	1.12762	0.0986522	-3.3415	down
mws0058	C16H12O6	Diosmetin	Flavonoids	Flavonoid	520-34-3	B	135360	145500	138120	1292400	1107300	1229200	1.14001	8.66127	3.11458	up
Zmgn000173	C5H10O5	D-Ribose	Others	Saccharides and Alcohols	50-69-1	A	254140	253110	248790	540050	589100	579050	1.13855	2.2594	1.17594	up
pme3163	C7H15O10P	D-Sedoheptuiose 7-phosphate	Others	Saccharides and Alcohols	2646-35-7	B	748010	680680	1421500	356810	370580	210910	1.00433	0.329206	-1.60294	down
mws0396	C18H34O2	Elaidic Acid	Lipids	Free fatty acids	112-79-8	A	768550	1104700	1196700	7897500	7021800	7624400	1.12967	7.34334	2.87644	up
pme2246	C14H6O8	Ellagic acid	Tannins	Tannin	476-66-4	A	26151	14451	12323	609870	577630	665780	1.13239	35.0171	5.12999	up
Hmdn001667	C20H16O13	Ellagicacid-4-O-glucoside	Tannins	Tannin	-	B	54949	46813	62062	9	9	9	1.14103	0.000164811	-12.5669	down
HJN041	C21H24O11	Epicatechin glucoside	Flavonoids	Flavanols	-	B	3058600	2498000	3421100	753620	824100	910760	1.12582	0.277185	-1.85108	down
mws0034	C22H18O11	Epigallocatechin 3-gallate*	Flavonoids	Flavanols	989-51-5	A	6087400	5885900	5854500	1189900	1079500	1075900	1.14004	0.187645	-2.41392	down
mws0042	C15H14O7	Epigallocatechin*	Flavonoids	Flavanols	970-74-1	A	980380	903010	976310	34368	47221	34459	1.13868	0.0405805	-4.62307	down
mws0064	C15H12O6	Eriodictyol	Flavonoids	Dihydroflavone	552-58-9	A	281310	247370	296720	1478400	1652800	1400900	1.13695	5.49079	2.45701	up
HJN086	C21H22O11	Eriodictyol-3'-O-glucoside*	Flavonoids	Dihydroflavone	-	B	182290	235810	248870	77375	52587	95928	1.07312	0.338681	-1.562	down
mws1015	C15H16O9	Esculin(6,7-DihydroxyCoumarin-6-glucoside)	Lignans and Coumarins	Coumarins	531-75-9	A	2693500	2898100	2646200	1252100	1228000	1213800	1.13809	0.448409	-1.15711	down
pme3034	C5H8O4	Ethylmalonic acid	Organic acids	Organic acids	601-75-2	B	22173	24970	33891	61466	58186	56135	1.08354	2.1693	1.11723	up
pmn001371	C27H34O12	Eucommin A	Lignans and Coumarins	Lignans	99633-12-2	A	88918	53072	74235	25549	31956	30071	1.06891	0.405023	-1.30393	down
mws0014	C10H10O4	Ferulic acid	Phenolic acids	Phenolic acids	537-98-4	A	24802	49130	23269	320640	381080	659080	1.10855	13.9999	3.80734	up
Hmbp001276	C8H8O4	Gallacetophenone	Phenolic acids	Phenolic acids	528-21-2	B	160360	148930	151760	76840	75041	78356	1.13789	0.499375	-1.0018	down
mws0351	C22H18O11	Gallate catechin gallate	Flavonoids	Flavanols	4233-96-9	B	5516700	5494600	4743600	1186300	930290	1148500	1.13327	0.207243	-2.27061	down
mws0024	C7H6O5	Gallic acid	Tannins	Tannin	149-91-7	A	1065500	2015600	1104100	4013300	4387500	3759100	1.06604	2.90545	1.53876	up
mws2220	C22H18O11	Gallocatechin 3-O-gallate	Flavonoids	Flavanols	5127-64-0	B	5939700	5680600	4686300	1030900	1303000	1177000	1.13154	0.215305	-2.21554	down
mws0049	C15H14O7	Gallocatechin*	Flavonoids	Flavanols	970-73-0	A	10591000	10814000	10460000	222360	349060	278280	1.13842	0.0266656	-5.22888	down
Lmmp002068	C45H38O19	Gallocatechin-catechin-catechin	Tannins	Proanthocyanidins	-	B	4225500	3529300	4427300	162800	170560	135060	1.13909	0.0384515	-4.70082	down
Lmmp000897	C30H26O14	Gallocatechin-Gallocatechin	Flavonoids	Flavanols	-	B	241300	202290	216040	65477	47066	50379	1.12619	0.24699	-2.01748	down
Lmmp001653	C45H38O20	Gallocatechin-gallocatechin-catechin	Tannins	Proanthocyanidins	-	B	2200500	2016900	2596000	42668	50010	40186	1.1399	0.0195004	-5.68035	down
pmn001519	C15H12O9	Galloyl Methyl gallate*	Tannins	Tannin	-	A	365960	453240	370670	93874	87321	67768	1.12784	0.209235	-2.2568	down
HJAP144	C52H42O22	Galloylprocyanidin C2	Tannins	Proanthocyanidins	-	B	71953	81797	72303	27143	39467	30933	1.10059	0.431505	-1.21255	down
pmp000275	C30H28O12	Gambiriin A1	Tannins	Proanthocyanidins	76250-49-2	B	700780	778780	766720	222810	298770	244060	1.12536	0.340848	-1.5528	down
pmp000273	C30H26O11	Gambiriin B3	Tannins	Proanthocyanidins	76236-90-3	B	81972	90563	103120	9	9	9	1.14114	9.79485e-05	-13.3176	down
Cmhn001271	C27H22O18	Gemin D	Tannins	Tannin	-	B	1288100	1205200	1241400	361520	530590	400600	1.11564	0.346135	-1.53059	down
pmb3081	C6H11PO11	Glucarate O-Phosphoric acid	Others	Saccharides and Alcohols	-	A	894850	1002600	1542800	347880	405830	296830	1.08683	0.305367	-1.71138	down
mws1090	C6H13O9P	Glucose-1-phosphate	Others	Saccharides and Alcohols	59-56-3	A	3781400	4135500	4646400	1638500	1547700	1466100	1.13111	0.370309	-1.4332	down
pmb3107	C15H20O10	Glucosyringic Acid	Phenolic acids	Phenolic acids	-	B	15029	14342	15131	78039	78542	79604	1.14092	5.30729	2.40798	up
pme0243	C5H8O4	Glutaric acid*	Organic acids	Organic acids	110-94-1	B	640850	811300	1022600	1881500	1883900	1896500	1.0858	2.28787	1.194	up
pme1086	C10H17N3O6S	Glutathione reduced form	Amino acids and derivatives	Amino acids and derivatives	70-18-8	A	3847300	3641600	3814400	9	9	9	1.14119	2.38868e-06	-18.6754	down
mws5042	C11H14N2O3	Glycylphenylalanine	Amino acids and derivatives	Amino acids and derivatives	721-66-4	A	54820	40350	55734	410250	447770	440530	1.13546	8.60514	3.1052	up
pme0066	C3H7N3O2	Guanidineacetic acid	Amino acids and derivatives	Amino acids and derivatives	352-97-6	B	14914	12031	20082	43087	43556	47898	1.09708	2.86093	1.51648	up
pme1178	C10H13N5O5	Guanosine	Nucleotides and derivatives	Nucleotides and derivatives	118-00-3	A	6459500	7122300	6551000	51503000	53219000	49640000	1.14043	7.66719	2.9387	up
mws0609	C10H12N5O7P	Guanosine 3',5'-cyclic monophosphate	Nucleotides and derivatives	Nucleotides and derivatives	7665-99-8	A	30191	53087	31908	27193000	28542000	28829000	1.13946	734.152	9.51993	up
pmb0998	C10H14N5O8P	Guanosine 5'-monophosphate	Nucleotides and derivatives	Nucleotides and derivatives	85-32-5	A	31415	33312	66137	535850	718750	502200	1.11845	13.4246	3.74681	up
pmn001622	C27H22O18	Hexahydroxydiphenoyl galloylglucose*	Phenolic acids	Phenolic acids	-	A	3702100	4993700	3109000	1332300	1575100	1482200	1.09234	0.371849	-1.42721	down
pmn001628	C20H18O14	Hexahydroxydiphenoylglucose	Phenolic acids	Phenolic acids	-	A	1307400	1727900	1521200	3788100	4103700	3614100	1.1205	2.52516	1.33638	up
pmp000001	C16H12O6	Hispidulin (5,7,4'-Trihydroxy-6-methoxyflavone)*	Flavonoids	Flavonoid	1447-88-7	B	112230	136940	110890	1151900	1096000	1166200	1.13895	9.48203	3.2452	up
pme2122	C5H9N3	Histamine	Amino acids and derivatives	Amino acids and derivatives	51-45-6	B	147200	280590	166150	1878200	1813400	2192900	1.12351	9.90757	3.30853	up
mws1033	C16H14O6	Homoeriodictyol	Flavonoids	Dihydroflavone	446-71-9	B	14650	18075	18944	70628	63622	58246	1.12873	3.72556	1.89746	up
pme0033	C5H4N4O	Hypoxanthine	Nucleotides and derivatives	Nucleotides and derivatives	68-94-0	B	10518	13698	18190	223230	220110	211710	1.13321	15.4471	3.94926	up
pme1651	C10H9NO2	Indole 3-acetic acid (IAA)	Alkaloids	Plumerane	87-51-4	B	223910	179300	189220	19759	25960	21790	1.13592	0.113953	-3.13349	down
mws0103	C9H7NO	Indole-3-carboxaldehyde	Alkaloids	Plumerane	487-89-8	A	37664	49548	41365	137680	132100	125150	1.12824	3.07154	1.61896	up
pmn001384	C25H24O12	Isochlorogenic acid C	Phenolic acids	Phenolic acids	57378-72-0	B	1023400	1027500	1035400	396690	534630	446490	1.11655	0.446428	-1.1635	down
mws5038	C12H22O11	Isomaltulose*	Others	Saccharides and Alcohols	13718-94-0	A	2964500	2259000	2742800	461360	433590	418050	1.13583	0.164819	-2.60104	down
pmb0964	C16H23N5O5	Isopentenyladenine-7-N-glucoside	Nucleotides and derivatives	Nucleotides and derivatives	-	B	211460	240110	266050	80600	81085	72078	1.13112	0.325748	-1.61817	down
Lmyp005280	C37H38O18	Isorhamnetin-3-O-[6''-p-coumarylglucosyl-(1->2)-O-rhamnoside]	Flavonoids	Flavonols	-	B	18287	22245	19194	45229	40592	43012	1.12446	2.15707	1.10907	up
Hmmp002121	C23H16O11	Isorhamnetin-3-O-gallate	Flavonoids	Flavonols	-	A	306880	227580	327090	55472	96721	91871	1.08503	0.283285	-1.81968	down
pme2493	C27H30O14	Kaempferol-3,7-O-dirhamnoside(Kaempferitrin)	Flavonoids	Flavonols	482-38-2	A	1458100	1350300	1342700	364040	505590	344000	1.11959	0.292363	-1.77417	down
Lmyp003500	C28H24O15	Kaempferol-3-O-(2''-galloyl)galactoside	Flavonoids	Flavonoid	-	B	2367400	2107700	1924600	845080	871790	772340	1.12819	0.388957	-1.36232	down
Xmyp004678	C32H38O19	Kaempferol-3-O-(2-O-Xylosyl-6-O-Rhamnosyl)Glucoside	Flavonoids	Flavonoid	-	A	36724	38810	49034	314130	186090	221260	1.11809	5.79186	2.53403	up
mws2209	C21H20O11	Kaempferol-3-O-glucoside	Flavonoids	Flavonols	480-10-4	A	11484000	9929900	11893000	4163800	4088600	6540400	1.06279	0.444136	-1.17093	down
Lmwp005248	C42H46O22	Kaempferol-3-O-(6'''-p-Coumaroylglucosyl)-(1->2)-Glucoside-7-Rhamnoside	Flavonoids	Flavonols	-	B	38278	61130	44647	20175	15022	21458	1.06665	0.393287	-1.34634	down
mws0913	C21H20O11	Kaempferol-3-O-galactoside (Trifolin)	Flavonoids	Flavonols	23627-87-4	A	2240300	2567600	2130300	937850	814930	826300	1.12915	0.371722	-1.4277	down
pmp001105	C33H40O20	Kaempferol-3-O-neohesperidoside-7-O-glucoside	Flavonoids	Flavonols	-	B	32331	51651	34492	11919	11069	16141	1.08092	0.330275	-1.59826	down
Lmyn001269	C27H30O16	Kaempferol-3-O-sophoroside	Flavonoids	Flavonoid	19895-95-5	B	380410	339350	461800	9	9	9	1.14108	2.28511e-05	-15.4174	down
Lmyp003599	C28H24O15	Kampferol 3-O-(6″-galloyl)-β-D-glucopyranoside	Flavonoids	Flavonoid	56317-05-6	B	2151100	2242200	1829000	807650	915970	708330	1.11745	0.390844	-1.35533	down
Lmmn001294	C14H20O9	Koaburaside	Phenolic acids	Phenolic acids	41653-73-0	B	393090	411010	396060	193140	200330	172420	1.13236	0.471512	-1.08463	down
MA10039641	C12H22O11	Lactobiose	Others	Saccharides and Alcohols	63-42-3	A	2197700	3572400	4405600	436330	488680	440210	1.11728	0.134165	-2.89792	down
mws4176	C12H16N2O3	L-Alanyl-L-Phenylalanine	Amino acids and derivatives	Amino acids and derivatives	3061-90-3	B	25991	27754	33403	460580	464400	467190	1.13929	15.9748	3.99772	up
HJN083	C26H34O11	Lariciresinol-4'-O-glucoside	Lignans and Coumarins	Lignans	143663-00-7	B	115600	102430	100360	34407	51695	42705	1.10076	0.404557	-1.30558	down
Hmfn000531	C6H8O6	L-Ascorbic acid	Others	Vitamin	50-81-7	A	6257800	7083000	6213800	302830	494940	466020	1.13381	0.0646288	-3.95168	down
mws0001	C4H8N2O3	L-Asparagine	Amino acids and derivatives	Amino acids and derivatives	70-47-3	A	251990	234530	226890	6916000	5943400	6391700	1.14073	26.9846	4.75407	up
pmb0464	C16H27NO14	L-Aspartic acid-O-diglucoside	Amino acids and derivatives	Amino acids and derivatives	-	B	3461100	3650600	3250700	1485300	1424300	1647500	1.13104	0.439773	-1.18517	down
mws5035	C15H22N2O3	Leucylphenylalanine	Amino acids and derivatives	Amino acids and derivatives	56217-82-4	B	65192	54456	71930	1543200	1497900	1339100	1.13919	22.8638	4.51499	up
pme0193	C5H10N2O3	L-Glutamine	Amino acids and derivatives	Amino acids and derivatives	56-85-9	B	50213	39959	57414	468730	520390	489370	1.13589	10.0178	3.3245	up
pme2253	C6H10O6	L-Gulonic-γ-lactone*	Others	Saccharides and Alcohols	1128-23-0	B	408600	427280	420870	131240	133720	148280	1.13838	0.328816	-1.60465	down
mws0254	C6H9N3O2	L-Histidine	Amino acids and derivatives	Amino acids and derivatives	71-00-1	A	636690	603970	821830	2100000	2165400	1995300	1.1235	3.03551	1.60194	up
Lmbp000123	C6H13NO2S	L-Homomethionine	Amino acids and derivatives	Amino acids and derivatives	25148-30-5	B	57025	59790	61294	629840	714130	628270	1.14018	11.0732	3.469	up
mws0671	C4H9NO3	L-Homoserine	Organic acids	Organic acids	672-15-1	B	3315000	3384500	3070200	8676000	7419100	8158800	1.13352	2.48256	1.31183	up
mws1491	C18H32O2	Linoleic acid	Lipids	Free fatty acids	60-33-3	A	9611900	9516100	9707200	40478000	41462000	42901000	1.14081	4.32947	2.11419	up
mws0258	C6H13NO2	L-Isoleucine	Amino acids and derivatives	Amino acids and derivatives	73-32-5	A	271430	277390	265900	2559100	2602200	2730600	1.14096	9.68664	3.276	up
mws0227	C6H13NO2	L-Leucine	Amino acids and derivatives	Amino acids and derivatives	61-90-5	A	262280	259130	271890	2465100	2463300	2692500	1.14066	9.60658	3.26402	up
Lmhp002031	C12H24N2O3	L-Leucyl-L-Leucine	Amino acids and derivatives	Amino acids and derivatives	3303-31-9	B	42657	44755	48953	746660	757260	752230	1.14059	16.5449	4.04832	up
pme0026	C6H14N2O2	L-Lysine	Amino acids and derivatives	Amino acids and derivatives	56-87-1	A	40457	40496	52222	475190	487550	465590	1.13795	10.7252	3.42293	up
pme1210	C5H11NO2S	L-Methionine	Amino acids and derivatives	Amino acids and derivatives	63-68-3	A	201050	273310	261070	744560	562940	703740	1.10556	2.73478	1.45143	up
pme0021	C9H11NO2	L-Phenylalanine	Amino acids and derivatives	Amino acids and derivatives	63-91-2	A	131900	143000	135820	2447700	2442800	2489400	1.141	17.9682	4.16737	up
pme0006	C5H9NO2	L-Proline	Amino acids and derivatives	Amino acids and derivatives	147-85-3	A	1203000	1231800	1314100	6778300	6663800	6354100	1.14021	5.28054	2.40068	up
Lmhp001461	C11H20N2O3	L-Prolyl-L-Leucine	Amino acids and derivatives	Amino acids and derivatives	52899-07-7	B	22963	24921	19696	92750	91943	112790	1.13194	4.40194	2.13814	up
Lmhp001732	C14H18N2O3	L-Prolyl-L-Phenylalanine	Amino acids and derivatives	Amino acids and derivatives	13589-02-1	B	14836	13627	20066	346480	329050	323000	1.13748	20.5759	4.36289	up
Lmrj001698	C9H18N2O4	L-Seryl-L-Isoleucine	Amino acids and derivatives	Amino acids and derivatives	91086-51-0	B	31991	31300	25975	347910	389450	377120	1.13939	12.4849	3.64212	up
mws0262	C4H6O6	L-Tartaric acid	Organic acids	Organic acids	87-69-4	B	84533	93509	77192	248310	223690	231430	1.13276	2.75602	1.46259	up
mws0230	C4H9NO3	L-Threonine	Amino acids and derivatives	Amino acids and derivatives	72-19-5	B	3266400	3260900	2996700	8080900	7544400	8216300	1.13748	2.50332	1.32384	up
mws0282	C11H12N2O2	L-Tryptophan	Amino acids and derivatives	Amino acids and derivatives	73-22-3	A	6265200	5156800	5424900	13919000	12569000	13007000	1.12861	2.34435	1.22919	up
mws0250	C9H11NO3	L-Tyrosine	Amino acids and derivatives	Amino acids and derivatives	60-18-4	A	2512800	2439000	2542600	22821000	21709000	21894000	1.14103	8.86315	3.14782	up
mws1608	C21H20O11	Luteolin-6-C-glucoside (Isoorientin)*	Flavonoids	Flavonoid carbonoside	4261-42-1	B	20091	22613	39287	66938	52069	60966	1.00632	2.19503	1.13424	up
Hmmn003584	C33H40O19	Luteolin-7-O-rutinoside-5-O-rhamnoside	Flavonoids	Flavonoid	-	B	608250	759370	685830	303820	321230	292080	1.12479	0.446629	-1.16285	down
mws0256	C5H11NO2	L-Valine*	Amino acids and derivatives	Amino acids and derivatives	72-18-4	A	1395000	1456700	1468600	9857200	10584000	10179000	1.14068	7.08752	2.82528	up
Lmhp001670	C11H22N2O3	L-Valyl-L-Leucine	Amino acids and derivatives	Amino acids and derivatives	3989-97-7	B	80367	81648	72930	1412700	1452000	1459200	1.1409	18.4039	4.20194	up
Lmhp002001	C14H20N2O3	L-Valyl-L-Phenylalanine	Amino acids and derivatives	Amino acids and derivatives	3918-92-1	B	33797	37348	34105	890900	929860	948620	1.14087	26.3124	4.71767	up
pmd0153	C19H39O7P	LysoPA 16:0	Lipids	Glycerol ester	22002-85-3	B	9	9	9	48150	21352	29208	1.1394	3655.93	11.836	up
pmb0862	C20H42NO7P	LysoPC 12:0	Lipids	LPC	20559-18-6	B	1076.6	1129.8	778.92	88210	89944	82969	1.13977	87.469	6.4507	up
pmd0130	C22H46NO7P	LysoPC 14:0(2n isomer)	Lipids	LPC	-	A	37141	43782	47787	1180400	1131600	1067800	1.13968	26.259	4.71474	up
pmb2319	C23H48NO7P	LysoPC 15:0	Lipids	LPC	-	A	21333	25072	26749	679980	705670	663470	1.14001	28.011	4.80792	up
Lmhp009129	C23H48NO7P	LysoPC 15:0(2n isomer)*	Lipids	LPC	-	B	21698	26460	26038	728320	723210	683320	1.14016	28.7731	4.84665	up
pmb2260	C23H46NO7P	LysoPC 15:1	Lipids	LPC	-	A	17619	23099	19998	866190	860300	872420	1.14011	42.8044	5.41969	up
pmb0855	C24H50NO7P	LysoPC 16:0	Lipids	LPC	17364-16-8	A	853140	952370	915740	17561000	18088000	17212000	1.1408	19.4253	4.27986	up
pmd0132	C24H50NO7P	LysoPC 16:0(2n isomer)*	Lipids	LPC	-	A	128690	157600	147570	1277800	1292600	1241500	1.13924	8.78601	3.13521	up
pmp001270	C24H48NO7P	LysoPC 16:1	Lipids	LPC	-	A	86379	103730	94616	744240	714230	741850	1.13947	7.72788	2.95007	up
Lmhp008833	C24H48NO7P	LysoPC 16:1(2n isomer)*	Lipids	LPC	-	B	75382	78360	90950	467910	462110	443640	1.13825	5.61383	2.48899	up
pma1303	C24H46NO7P	LysoPC 16:2	Lipids	LPC	-	B	8204.2	11637	10193	625580	646990	592780	1.13958	62.1075	5.9567	up
pmb0863	C24H46NO7P	LysoPC 16:2(2n isomer)*	Lipids	LPC	-	A	7311.8	5945	6624.4	113740	111840	102910	1.14001	16.5226	4.04637	up
pmb2406	C25H52NO7P	LysoPC 17:0	Lipids	LPC	50930-23-9	A	36743	43725	40538	1163000	1162600	1096500	1.14052	28.2804	4.82173	up
Lmhp010515	C25H52NO7P	LysoPC 17:0(2n isomer)*	Lipids	LPC	-	B	2512.3	3782.1	2500.4	27725	26739	26511	1.13264	9.20715	3.20275	up
Lmhp009590	C25H50NO7P	LysoPC 17:1	Lipids	LPC	-	A	32188	34929	37721	813490	845590	787730	1.14048	23.339	4.54467	up
Lmhp008718	C25H48NO7P	LysoPC 17:2	Lipids	LPC	-	A	7557.3	6910.8	8149	49544	54045	53019	1.13925	6.92432	2.79167	up
mws0126	C26H54NO7P	LysoPC 18:0	Lipids	LPC	19420-57-6	A	176920	199570	199460	5066700	4647300	4355800	1.14035	24.4289	4.61051	up
pmd0136	C26H54NO7P	LysoPC 18:0(2n isomer)	Lipids	LPC	-	A	194580	225480	239630	5950300	5419500	5091600	1.13978	24.9532	4.64115	up
pmp001281	C26H52NO7P	LysoPC 18:1	Lipids	LPC	-	A	1104600	1259300	1137300	6117100	5820100	5794200	1.13955	5.06438	2.34039	up
Lmhp010190	C26H52NO7P	LysoPC 18:1(2n isomer)*	Lipids	LPC	-	A	5901600	5673300	5829800	18624000	18305000	18938000	1.14085	3.20988	1.68252	up
pmp001273	C26H50NO7P	LysoPC 18:2	Lipids	LPC	-	A	3629900	4287700	4074900	37902000	37829000	37629000	1.13996	9.45257	3.24071	up
pmp001251	C26H50NO7P	LysoPC 18:2(isomer)*	Lipids	LPC	-	A	9545600	9686700	10524000	45392000	45627000	45303000	1.14012	4.58128	2.19575	up
pmb0854	C26H48NO7P	LysoPC 18:3	Lipids	LPC	-	A	1368800	1793300	1642200	19818000	18767000	19161000	1.13861	12.0196	3.58732	up
pmb0865	C26H48NO7P	LysoPC 18:3(2n isomer)*	Lipids	LPC	-	A	4483800	4724200	5279800	27780000	26524000	27242000	1.13908	5.6286	2.49278	up
Lmhp010908	C27H54NO7P	LysoPC 19:1	Lipids	LPC	-	A	6102.5	5761.8	4636.6	44679	39168	38919	1.13659	7.43996	2.89529	up
Lmhp007840	C27H52NO7P	LysoPC 19:2	Lipids	LPC	-	B	900.65	1089.1	875.69	91429	93298	82501	1.14053	93.259	6.54317	up
Lmhp007598	C27H52NO7P	LysoPC 19:2(2n isomer)*	Lipids	LPC	-	B	3192.1	4109.7	4051.6	194570	168040	198150	1.13965	49.3914	5.62619	up
Lmhp011549	C28H56NO7P	LysoPC 20:1	Lipids	LPC	-	A	14478	13717	17784	130890	138450	122760	1.13727	8.52781	3.09217	up
pmd0147	C28H54NO7P	LysoPC 20:2	Lipids	LPC	-	A	11990	13766	13913	224590	209060	207190	1.14022	16.1547	4.01388	up
pmd0146	C28H54NO7P	LysoPC 20:2(2n isomer)*	Lipids	LPC	-	B	5644.7	5756.4	6476	41391	40088	40426	1.13984	6.81906	2.76957	up
Lmhp009890	C28H52NO7P	LysoPC 20:3	Lipids	LPC	-	A	13423	15352	16969	254510	238390	242340	1.13953	16.0729	4.00656	up
pmb0864	C19H40NO7P	LysoPE 14:0	Lipids	LPE	-	B	10020	12054	10237	37632	40875	38955	1.13566	3.63536	1.8621	up
Lmhp008337	C19H40NO7P	LysoPE 14:0(2n isomer)*	Lipids	LPE	-	B	9517.7	14218	13957	36673	38933	37898	1.10971	3.0113	1.59039	up
Lmhp009187	C20H42NO7P	LysoPE 15:0	Lipids	LPE	-	B	8326.3	8651.7	7752.6	32568	38633	36942	1.13734	4.37284	2.12857	up
Lmhp008885	C20H42NO7P	LysoPE 15:0(2n isomer)	Lipids	LPE	-	B	7530.9	9770.1	7254.1	33826	39067	34650	1.13013	4.37966	2.13082	up
Lmhp008440	C20H40NO7P	LysoPE 15:1	Lipids	LPE	-	B	3578.3	4810.1	3100.4	17958	20765	17835	1.12474	4.92288	2.2995	up
pmd0160	C21H44NO7P	LysoPE 16:0(2n isomer)	Lipids	LPE	-	A	2531300	2834400	2675800	9384800	9404600	9221600	1.13946	3.48331	1.80046	up
pmb0876	C21H44NO7P	LysoPE 16:0*	Lipids	LPE	53862-35-4	A	2469500	2756800	2637700	9676300	9835400	9240100	1.1392	3.65613	1.87032	up
Lmhp009769	C22H44NO7P	LysoPE 17:1*	Lipids	LPE	-	B	11501	14564	14107	49446	54419	48458	1.13218	3.79177	1.92287	up
pmb0883	C23H48NO7P	LysoPE 18:0	Lipids	LPE	69747-55-3	B	20566	20883	21309	129910	122690	111260	1.13962	5.79783	2.53551	up
pmb0856	C23H46NO7P	LysoPE 18:1(2n isomer)*	Lipids	LPE	-	A	449000	424270	459080	1707700	1573200	1701600	1.13957	3.73963	1.9029	up
pmb0881	C23H44NO7P	LysoPE 18:2	Lipids	LPE	-	A	584330	680920	632020	1470100	1451400	1445300	1.13454	2.30162	1.20265	up
pmb0874	C23H44NO7P	LysoPE 18:2(2n isomer)*	Lipids	LPE	-	A	3330200	2910200	3042300	13184000	12970000	13088000	1.13964	4.22743	2.07978	up
Lmhp008801	C23H42NO7P	LysoPE 18:3	Lipids	LPE	-	A	248900	312050	288790	534330	574500	599220	1.11565	2.01009	1.00726	up
Lmhp008589	C23H42NO7P	LysoPE 18:3(2n isomer)*	Lipids	LPE	-	A	1013500	880190	980690	3590700	3682000	3750800	1.13877	3.83509	1.93926	up
Lmhp010757	C25H48NO7P	LysoPE 20:2	Lipids	LPE	-	A	2987.9	3785.5	3283.5	11388	9513.7	11844	1.1262	3.25604	1.70312	up
Lmhp010514	C25H48NO7P	LysoPE 20:2(2n isomer)*	Lipids	LPE	-	B	2931	2827	3397.6	11776	10206	11641	1.134	3.6724	1.87672	up
Lmhp010040	C25H46NO7P	LysoPE 20:3	Lipids	LPE	-	A	2833.7	2747.6	2505.3	11233	9816.3	12236	1.13526	4.11611	2.04128	up
Lmhp009802	C25H46NO7P	LysoPE 20:3(2n isomer)*	Lipids	LPE	-	B	3060.2	2716.2	2870.7	12933	9245.1	10060	1.1268	3.7282	1.89848	up
Hmyn007168	C22H45O9P	LysoPG(16:0)	Lipids	Glycerol ester	-	A	52784	52544	48183	318720	293920	280440	1.13973	5.81769	2.54045	up
Zmhn005413	C15H12O9	m/p Dimeric galloyl methyl este*	Tannins	Tannin	-	A	1402200	1535600	1143600	266480	277530	260260	1.13404	0.197057	-2.34331	down
pmb0296	C21H40O4	MAG(18:1)isomer2*	Lipids	Glycerol ester	-	A	113250	116180	109880	264720	231610	273140	1.1319	2.26775	1.18126	up
mws1593	C24H42O21	Maltotetraose*	Others	Saccharides and Alcohols	34612-38-9	B	35124	38538	30167	16195	13095	7351.7	1.03875	0.352904	-1.50265	down
Smlp003276	C26H27O15+	Malvidin-3-O-malonylglucoside	Flavonoids	Anthocyanins	-	B	51313	46957	52188	17685	23255	14618	1.10094	0.369259	-1.43729	down
Lmfn001769	C28H26O17	Maplexin G	Tannins	Tannin	-	B	180770	151380	117310	9	9	9	1.1407	6.00721e-05	-14.0229	down
Lmfp003026	C28H26O16	Maplexin H	Tannins	Tannin	-	B	395110	317080	243870	34714	34938	28770	1.13023	0.102945	-3.28005	down
Hmlp003129	C20H22O6	Matairesinol	Lignans and Coumarins	Lignans	580-72-3	A	97661	93393	94256	168450	209560	203350	1.11939	2.03764	1.0269	up
pme1419	C6H13NO2S	Methionine methyl ester	Amino acids and derivatives	Amino acids and derivatives	10332-17-9	B	79358	70218	71808	17347	17410	17227	1.13946	0.234814	-2.09041	down
pmn001546	C40H32O27	Methyl 5-galloyl gallate	Phenolic acids	Phenolic acids	-	B	30227	23005	25625	11456	12876	12443	1.11206	0.46635	-1.10051	down
mws1212	C11H12O4	Methyl ferulate	Phenolic acids	Phenolic acids	2309-07-1	B	916290	645230	680780	12926	15201	11968	1.13864	0.0178812	-5.80541	down
mws1195	C10H10O3	Methyl p-coumarate*	Phenolic acids	Phenolic acids	3943-97-3	A	1702200	1286200	1476900	119060	123870	133350	1.13821	0.0842676	-3.56888	down
pmn001669	C12H14O5	Methyl sinapate	Phenolic acids	Phenolic acids	20733-94-2	B	7205	8987.2	11956	9	9	9	1.14037	0.000959209	-10.0259	down
Hmtn001288	C9H10O4	Methyl-(2,4-dihydroxyphenyl)acetate	Phenolic acids	Phenolic acids	-	B	5376.3	8232.1	5236.5	28345	23550	27806	1.11553	4.22931	2.08042	up
mws0032	C15H10O8	Myricetin	Flavonoids	Flavonols	529-44-2	B	107880	168130	119380	36782	56718	42249	1.0788	0.343329	-1.54233	down
pmn001640	C20H18O12	Myricetin-3-O-arabinoside	Flavonoids	Flavonols	132679-85-7	A	6230500	5155300	6878300	732080	787630	646160	1.13605	0.118586	-3.07599	down
Lmpp003465	C21H20O13	Myricetin-3-O-glucoside	Flavonoids	Flavonols	19833-12-6	B	8893400	7982300	8351700	1503900	2048100	1469900	1.13068	0.199065	-2.32869	down
pme3033	C4H9NO2	N,N-Dimethylglycine*	Amino acids and derivatives	Amino acids and derivatives	1118-68-9	B	269220	310700	387490	1109000	1084700	1132000	1.1241	3.43774	1.78146	up
pme3337	C14H17N5O8	N6-Succinyl Adenosine	Nucleotides and derivatives	Nucleotides and derivatives	4542-23-8	A	1938300	1776600	1968700	4029200	4070600	3902600	1.13639	2.11176	1.07845	up
pme0253	C8H15NO3	N-Acetyl-L-leucine	Amino acids and derivatives	Amino acids and derivatives	1188-21-2	B	15712	19176	16460	203230	235870	189370	1.13825	12.2394	3.61346	up
mws0520	C11H13NO4	N-Acetyl-L-tyrosine	Amino acids and derivatives	Amino acids and derivatives	537-55-3	B	19072	20870	17829	136230	141230	128910	1.1396	7.03415	2.81438	up
pme2651	C21H28N7O17P3	NADP (Nicotinamide adenine dinucleotide phosphate)	Nucleotides and derivatives	Nucleotides and derivatives	53-59-8	B	297120	335270	288840	54596	49383	49009	1.13876	0.166069	-2.59014	down
pme0376	C15H12O5	Naringenin	Flavonoids	Dihydroflavone	480-41-1	A	594860	561310	545680	50182	49542	48074	1.14078	0.0868455	-3.52541	down
pme2960	C15H12O5	Naringenin chalcone*	Flavonoids	Chalcones	73692-50-9	B	794490	797570	733170	64337	65412	59647	1.14054	0.0814526	-3.6179	down
mws1179	C21H22O10	Naringenin-7-O-glucoside (Prunin)	Flavonoids	Dihydroflavone	529-55-5	A	775390	764580	818470	71527	66837	75780	1.14054	0.090799	-3.46118	down
HJN087	C21H22O10	Naringenin-O-glucoside	Flavonoids	Flavonoid	-	A	564150	573780	674650	261620	251210	289840	1.12467	0.442833	-1.17517	down
pmp001287	C8H9N	N-Benzylmethylene isomethylamine	Alkaloids	Alkaloids	-	A	2913400	3044100	3087100	49696000	52070000	48952000	1.14094	16.6639	4.05865	up
pme1816	C16H18O9	Neochlorogenic acid(5-O-Caffeoylquinic acid)	Phenolic acids	Phenolic acids	906-33-2	A	2552400	2077800	2566000	979770	1090800	933640	1.12093	0.417472	-1.26025	down
pmp001080	C28H32O15	Neodiosmin (Diosmetin-7-O-Neohesperidoside)*	Flavonoids	Flavonoid	38665-01-9	B	20439	27143	16833	70232	66835	77414	1.11051	3.32967	1.73538	up
pmb0496	C15H22N4O3	N-Feruloylagmatine	Alkaloids	Phenolamine	-	B	21836000	23724000	23069000	430270	659810	535430	1.13883	0.0236855	-5.39985	down
mws1375	C12H21N3O6	Nicotianamine	Amino acids and derivatives	Amino acids and derivatives	34441-14-0	A	337190	346870	336940	169020	163020	159930	1.13961	0.481851	-1.05334	down
mws0146	C7H7NO2	Nicotinic Acid Methyl Ester(Methyl Nicotinate)	Alkaloids	Alkaloids	93-60-7	B	196840	134090	156590	39965	52889	35960	1.10922	0.264223	-1.92017	down
mws0983	C20H39NO2	N-Oleoylethanolamine	Others	Others	111-58-0	A	14037	15502	15241	42831	58797	58435	1.12406	3.57443	1.83771	up
pmb1574	C18H28O2	Octadecadien-6-ynoic acid	Lipids	Glycerol ester	-	B	5821.2	5178.3	4891.7	204020	208110	222780	1.14075	39.9536	5.32025	up
Lmdn001925	C26H34O12	Olivil-4'-O-glucoside	Lignans and Coumarins	Lignans	76880-93-8	B	22486	16437	24438	65860	61812	68638	1.115	3.09828	1.63147	up
pmb1754	C5H15NO4P+	O-Phosphocholine	Alkaloids	Alkaloids	107-73-3	B	918670	850530	828920	3523000	3293300	3027600	1.13782	3.78886	1.92176	up
mws1589	C18H32O16	Panose*	Others	Saccharides and Alcohols	33401-87-5	B	530290	1006800	701400	86776	71625	72347	1.12443	0.103082	-3.27814	down
pme1261	C9H19NO4	Pantothenol	Others	Saccharides and Alcohols	16485-10-2	B	1305.2	2434.5	2775.4	84356	94296	105690	1.13159	43.6435	5.4477	up
pme1439	C9H8O3	p-Coumaric acid	Phenolic acids	Phenolic acids	501-98-4	B	24970	41237	42422	269440	296010	295420	1.12489	7.92486	2.98639	up
pmb0508	C14H20N4O2	p-Coumaroylagmatine	Alkaloids	Phenolamine	7295-86-5	A	14187	15442	12578	9	9	9	1.14101	0.000639704	-10.6103	down
Lmhn003689	C23H20O11	p-Coumaroylferuloyltartaric acid	Phenolic acids	Phenolic acids	-	B	19012	16980	17058	9	9	9	1.1411	0.000508954	-10.9402	down
pmb0490	C13H18N2O2	p-Coumaroylputrescine	Alkaloids	Phenolamine	34136-53-3	B	53105	45608	54349	23880	24015	20226	1.12016	0.445055	-1.16794	down
pme1793	C27H31O15+	Pelargonidin-3,5-diglucoside	Flavonoids	Anthocyanins	17334-58-6	B	585570	492240	768750	67083	82854	73166	1.13111	0.120821	-3.04906	down
Smsp001640	C27H31O16+	Petunidin-3-O-glucoside-O-arabinoside	Flavonoids	Anthocyanins	-	B	17342000	14596000	17571000	249770	408350	328950	1.13785	0.0199372	-5.64839	down
mws0159	C9H8O3	Phenylpyruvic acid	Organic acids	Organic acids	156-06-9	B	32932	34649	34376	142370	206150	188650	1.13032	5.26859	2.39742	up
mws0636	C18H20N2O3	Phe-Phe	Amino acids and derivatives	Amino acids and derivatives	2577-40-4	B	10402	8296.8	4666.5	58442	90651	94328	1.11053	10.4181	3.38101	up
mws2125	C3H4KO6P	Phosphoenolpyruvic acid	Organic acids	Organic acids	4265-07-0	A	167450	144620	135260	10732	9845.6	13810	1.13609	0.076873	-3.70138	down
pme0282	C8H6O4	Phthalic acid*	Organic acids	Organic acids	88-99-3	A	60682	70595	56733	127130	131910	143290	1.12058	2.13994	1.09757	up
Lmgp000796	C8H7NO2	p-Hydroxymandelonitrile	Alkaloids	Alkaloids	-	A	208760	294610	249280	741100	689970	705530	1.12009	2.83877	1.50527	up
mws0914	C15H12O5	Pinobanksin*	Flavonoids	Dihydroflavonol	548-82-3	A	600560	580970	511620	54343	49489	50751	1.13971	0.0912991	-3.45326	down
pmb0782	C5H11N	Piperidine	Alkaloids	Alkaloids	110-89-4	B	1056000	976330	1093900	12267000	12126000	12356000	1.14074	11.7551	3.55521	up
mws0836	C30H26O12	Procyanidin B1	Tannins	Proanthocyanidins	20315-25-7	A	3727100	3489500	4415800	1826200	1871200	1768300	1.1213	0.469869	-1.08967	down
pme0436	C30H26O12	Procyanidin B3	Tannins	Proanthocyanidins	23567-23-9	A	86602	106890	155580	55835	51515	54239	1.0358	0.46291	-1.1112	down
pmn001667	C30H26O12	Procyanidin B4	Tannins	Proanthocyanidins	29106-51-2	A	1975500	1622300	2120500	252820	381410	242620	1.12444	0.153341	-2.70518	down
Lmpp003705	C52H42O22	Procyanidin C1 3'-O-gallate	Tannins	Proanthocyanidins	-	B	784810	664670	830910	127370	216480	194120	1.11049	0.235911	-2.08368	down
pmn001646	C45H38O18	Procyanidin C1*	Tannins	Proanthocyanidins	37064-30-5	A	1251100	1052100	1162900	199410	216340	195550	1.13848	0.176365	-2.50336	down
pmn001647	C45H38O18	Procyanidin C2	Tannins	Proanthocyanidins	37064-31-6	B	1297500	940990	1206100	283670	303320	202980	1.11583	0.229336	-2.12446	down
pmp001282	C28H50NO7P	Propyl 2-(trimethylammonio)ethyl phosphate	Others	Others	-	B	118910	131380	119130	435810	375980	391370	1.13641	3.25689	1.70349	up
pmb0889	C18H30O2	Punicic acid	Lipids	Free fatty acids	544-72-9	A	490310	480630	479200	11696000	11226000	11152000	1.14117	23.497	4.55441	up
mws0025	C6H6O3	Pyrogallol	Phenolic acids	Phenolic acids	87-66-1	B	192270	682920	225640	46177	30738	32158	1.06395	0.0990825	-3.33523	down
Lmmn004912	C16H12O7	Quercetin-3-O-methyl ether	Flavonoids	Flavonols	1486-70-0	B	20667	20184	20120	57451	56037	55006	1.1408	2.76351	1.4665	up
Lnrp102163	C33H40O20	Quercetin-3-O-rutinoside-7-O-rhamnoside	Flavonoids	Flavonols	-	B	355790	439680	382800	132720	86316	123470	1.11072	0.290685	-1.78247	down
Lmjp004941	C16H12O6	Rhamnocitrin (7-Methylkaempferol)	Flavonoids	Flavonoid	569-92-6	A	115440	131170	114220	1195500	1139800	1197600	1.14024	9.79104	3.29146	up
Lmdp003146	C10H14O2	Rhododendrol	Others	Others	501-96-2	B	299390	264550	269740	43227	22966	26026	1.1234	0.110617	-3.17636	down
pme2746	C27H33N9O15P2	Riboflavin 5'-Adenosine Diphosphate	Nucleotides and derivatives	Nucleotides and derivatives	146-14-5	B	134050	127700	128390	46896	44039	42654	1.13898	0.342413	-1.54619	down
pme1286	C14H20N6O5S	S-(5'-Adenosy)-L-homocysteine	Amino acids and derivatives	Amino acids and derivatives	979-92-0	A	507480	575140	613350	211780	230910	188670	1.1268	0.372271	-1.42558	down
pme2735	C15H22N6O5S	S-Adenosyl-L-methionine	Amino acids and derivatives	Amino acids and derivatives	29908-03-0	B	1957100	1849200	1686900	662670	702870	719810	1.1349	0.379624	-1.39736	down
Zmhn001926	C13H16O8	Salicylic acid O-glycoside*	Phenolic acids	Phenolic acids	-	A	14367000	12627000	14838000	112160	109240	90766	1.14053	0.00746237	-7.06615	down
pme2024	C10H12N2O	Serotonin	Alkaloids	Plumerane	50-67-9	B	310150	243020	334090	9	9	9	1.14101	3.04308e-05	-15.0041	down
pme3443	C11H12O4	Sinapinaldehyde	Phenolic acids	Phenolic acids	4206-58-0	B	24508	36497	26932	7871.8	7980.7	7094.9	1.12154	0.260953	-1.93814	down
Lmhn001580	C15H16O10	sinapoyltartaric acid	Phenolic acids	Phenolic acids	-	B	9	9	9	127090	137350	133450	1.14117	14736.7	13.8471	up
Hmln002597	C10H9NaO4	Sodium ferulate	Others	Others	-	B	129020	96456	97456	3570.5	6341.9	5215.8	1.13226	0.0468464	-4.41592	down
Lmlp002765	C15H16O2	Stilbostemin B	Phenolic acids	Phenolic acids	162411-67-8	B	3687.4	3936	5052.2	29446	35729	31567	1.13394	7.63214	2.93209	up
Zmln000899	C15H20O9	Syringic Aldehyde-glucoside	Phenolic acids	Phenolic acids	-	B	134690	136220	148730	29202	38753	33230	1.13312	0.241123	-2.05216	down
mws0011	C17H24O9	Syringin	Phenolic acids	Phenolic acids	118-34-3	B	17078	22476	27981	6188.6	12637	6779.5	1.01	0.379138	-1.3992	down
pme0281	C8H6O4	Terephthalic acid	Phenolic acids	Phenolic acids	100-21-0	A	605570	593140	595580	1333600	1320900	1340200	1.14106	2.22634	1.15467	up
pmn001378	C26H32O11	Terpineol mono-glucoside	Lignans and Coumarins	Lignans	-	A	3189000	2880300	3221100	1164000	1134300	1178600	1.13787	0.374247	-1.41794	down
Lmcn004772	C20H16O9	Theaflagallin	Tannins	Tannin	102208-15-1	B	41719	55633	69429	4572600	5590300	4515300	1.13787	88.0088	6.45958	up
Lmcn004686	C43H32O19	Theaflavate B;3'-O-(3,4,5-Trihydroxybenzoyl)	Tannins	Tannin	152542-70-6	B	2013900	2420500	1991900	210290	292820	240430	1.13497	0.115703	-3.11151	down
Lmcn003163	C28H20O14	Theaflavic acid;3-Epimer,3-O-(3,4,5-trihydroxybenzoyl)	Tannins	Tannin	34218-97-8	B	3748600	3979800	4084500	825970	1002100	1136300	1.13083	0.250943	-1.99457	down
mws1293	C29H24O12	Theaflavin	Tannins	Proanthocyanidins	4670-5-7	A	390340	707430	702830	8909300	10336000	9794400	1.129	16.1278	4.01148	up
mws1296	C43H32O20	Theaflavin 3,3'-Digallate	Tannins	Proanthocyanidins	30462-35-2	A	98555	121570	141680	11104000	10912000	10602000	1.13973	90.1535	6.49431	up
mws1294	C36H28O16	Theaflavin-3-gallate*	Tannins	Proanthocyanidins	30462-34-1	A	108870	168510	151040	4885500	5312800	4956600	1.13774	35.3739	5.14461	up
mws1295	C36H28O16	Theaflavin-3'-Gallate8	Tannins	Proanthocyanidins	28543-07-9	B	56656	89648	89798	2755300	2949600	2576600	1.1364	35.0759	5.13241	up
mws0920	C15H10O7	Tricetin	Flavonoids	Flavonoid	520-31-0	A	2526900	2407400	2846800	566700	575510	511680	1.13772	0.212552	-2.23411	down
Lmzp004885	C17H14O7	Tricin*	Flavonoids	Flavonoid	520-32-1	A	295760	306110	298460	2301400	2415300	2282600	1.14093	7.77415	2.95868	up
pme2268	C7H7NO2	Trigonelline	Alkaloids	Alkaloids	535-83-1	B	83990	74465	69446	34096	31970	30988	1.12847	0.42586	-1.23155	down
mws5040	C12H21O11Na	Turanose	Others	Saccharides and Alcohols	547-25-1	B	2429500	3339100	2882900	684200	581760	618730	1.13095	0.217845	-2.19862	down
pmb2922	C15H24N2O17P2	Uridine 5'-diphospho-D-glucose	Nucleotides and derivatives	Nucleotides and derivatives	133-89-1	A	3213900	2997100	3232600	561020	533030	427360	1.13599	0.161105	-2.63393	down
pme3188	C9H13N2O9P	Uridine 5'-monophosphate	Nucleotides and derivatives	Nucleotides and derivatives	58-97-9	A	32538	48906	35487	2620700	2394700	2144300	1.13866	61.2301	5.93617	up
mws0248	C9H12N2O6	Uridine*	Nucleotides and derivatives	Nucleotides and derivatives	58-96-8	A	37206	40967	55899	856990	718980	612380	1.13387	16.3222	4.02876	up
mws0028	C8H8O4	Vanillic acid	Phenolic acids	Phenolic acids	121-34-6	B	17840	12793	19929	83308	120120	94021	1.12023	5.88286	2.55652	up
Lmhn001386	C12H12O9	Vnilloyltartaric acid	Phenolic acids	Phenolic acids	-	B	67781	85870	82873	37670	29905	33322	1.11162	0.426583	-1.2291	down
pme0256	C5H4N4O2	Xanthine	Nucleotides and derivatives	Nucleotides and derivatives	69-89-6	A	24501	22579	24372	94708	82859	92132	1.13829	3.77455	1.9163	up
mws0668	C10H12N4O6	Xanthosine	Nucleotides and derivatives	Nucleotides and derivatives	146-80-5	A	12082000	11132000	13489000	5928700	5912700	5117500	1.12106	0.462058	-1.11386	down
Lmbn002648	C9H8O3	α-Hydroxycinnamic Acid	Phenolic acids	Phenolic acids	5801-57-0	B	82868	115680	78940	1848100	1662400	1659600	1.13714	18.6318	4.21969	up
pme2380	C5H6O5	α-Ketoglutaric acid	Organic acids	Organic acids	328-50-7	A	822510	834110	632730	241460	281740	258030	1.12117	0.341245	-1.55112	down
mws0367	C18H30O2	α-Linolenic Acid*	Lipids	Free fatty acids	463-40-1	A	5091600	5171300	5009800	19242000	19096000	19126000	1.14112	3.76253	1.9117	up
mws0675	C11H15N2O8P	β-Nicotinamide mononucleotide	Nucleotides and derivatives	Nucleotides and derivatives	1094-61-7	B	43047	40550	38778	190240	131510	153080	1.12643	3.88012	1.9561	up
pme3011	C4H9NO2	γ-Aminobutyric acid*	Organic acids	Organic acids	1956-12-2	B	134160	181590	225290	1391800	1333900	1387200	1.12838	7.60184	2.92635	up
mws0366	C18H30O2	γ-Linolenic Acid	Lipids	Free fatty acids	506-26-3	B	4765100	4900700	4652500	17792000	18120000	18145000	1.14087	3.77538	1.91662	up
pmb0128	C13H24O2	δ-Tridecalactone	Lipids	Glycerol ester	7370-92-5	B	5483.9	6562.2	5677.8	14679	16992	19012	1.12332	2.85959	1.51581	up
