# Supplementary material for: A Comparative Metabolomic Analysis Reveals Difference Manufacture Suitability in “Yinghong 9” and “Huangyu” Teas (Camellia sinensis)
Source: Front Plant Sci. 2021 Dec 14;12:767724. doi: 10.3389/fpls.2021.767724 (PMC8712721; doi:10.3389/fpls.2021.767724)
Supplement: Supplementary Table 3 — Differential metabolites between “Huangyu” fresh leaves and fermented leaves. [file Table_3.XLSX]

## Sheet: Sheet1
Index	Formula	Compounds	Class I	Class II	CAS	Level	HYY1	HYY2	HYY3	HYF1	HYF2	HYF3	VIP	Fold_Change	Log2FC	Type
Wmhn004451	C25H24O11	"1,4,8-Trihydroxynaphthalene-1-O-[6'-O-(3"",4"",5""-trimethylbenzoyl)]glucoside"	Quinones	Quinones	-	B	123060	107450	114760	52870	55633	41756	1.09853	0.435193	-1.20027	down
Lmtp004126	C24H22O16	"Myricetin-3-O-(6""-malony)glucoside"	Flavonoids	Flavonols	-	B	140630	167480	118280	42098	44443	36508	1.10779	0.288583	-1.79294	down
Lmtn003096	C26H36O11	(-)-Secoisolariciresinol 4-O-glucoside	Lignans and Coumarins	Lignans	-	B	1740800	1695800	1494000	590640	636720	591210	1.12086	0.368833	-1.43896	down
Cmcp003396	C22H18O9	(+)-Afzelechin-3-O-gallate	Flavonoids	Flavanols	-	A	13221000	12909000	13461000	5238600	5195700	4932300	1.12588	0.388134	-1.36537	down
Lmmn003875	C21H24O7	(+)-Medioresinol	Lignans and Coumarins	Lignans	40957-99-1	B	21375	16061	13897	888550	884440	897330	1.12476	52.0196	5.70098	up
Lmbn006152	C18H32O2	(9Z,11E)-Octadecadienoic acid	Lipids	Free fatty acids	2540-56-9	B	10360	11268	10613	46404	49068	39544	1.12182	4.18771	2.06616	up
Lmgn000224	C5H6O5	(S)-2-methyl-3-oxosuccinic acid	Organic acids	Organic acids	-	A	70677	64899	100680	30441	35405	32239	1.07091	0.415164	-1.26825	down
Lmxp010913	C35H66NO9P	1-(9Z-Octadecenoyl)-2-(9-oxo-nonanoyl)-sn-glycero-3-phosphocholine	Lipids	Glycerol ester	-	A	18020	22627	28526	4661.7	5335.7	6979.7	1.09222	0.24543	-2.02662	down
pmn001534	C34H28O22	1,2,3,6-Tetra-O-Galloyl-D-Glucose*	Phenolic acids	Phenolic acids	79886-50-3	B	355400	350170	330170	122430	116600	115760	1.12555	0.342547	-1.54562	down
pmn001523	C21H14O13	1,3-Trigallic acid*	Phenolic acids	Phenolic acids	-	B	378050	111170	469280	9	9	9	1.12292	2.8169e-05	-15.1155	down
pme2529	C6H12O5	1,5-Anhydro-D-glucitol	Others	Saccharides and Alcohols	154-58-5	B	62757	72417	54179	146560	117500	136380	1.08494	2.11478	1.08051	up
pmn001526	C20H20O14	1,6-Di-O-Galloyl-D-Glucose*	Phenolic acids	Phenolic acids	-	B	1131700	1673600	1394700	543600	793610	620560	1.04105	0.466136	-1.10118	down
pmn001686	C16H32O4	10,16-Dihydroxypalmitic acid	Lipids	Free fatty acids	3233-90-7	A	5988.3	4219	5141.3	37556	37731	37731	1.12131	7.36341	2.88037	up
mws2623	C18H34O2	11-Octadecanoic acid(Vaccenic acid)	Lipids	Free fatty acids	506-17-2	A	840440	776260	829010	4071300	4085600	4011900	1.12655	4.97557	2.31486	up
Lmbn005369	C18H32O3	13(S)-HODE;13(S)-Hydroxyoctadeca-9Z,11E-dienoic acid	Lipids	Free fatty acids	10219-69-9	B	246720	218150	212300	6162300	5879900	6027700	1.12662	26.6844	4.73793	up
pmb2804	C18H32O4	13-HPODE*	Lipids	Glycerol ester	33964-75-9	B	36941	36385	37381	605230	707570	691370	1.12645	18.1034	4.17819	up
Lmbn005443	C18H30O3	13-KODE; (9Z,11E)-13-Oxooctadeca-9,11-dienoic acid	Lipids	Free fatty acids	54739-30-9	B	2127.1	1927	2129.7	54878	58155	53747	1.12676	26.9705	4.75331	up
Rfmb087	C18H32O4	13-Oxo-9-hydroxy-10-octadecenoic acid*	Lipids	Free fatty acids	-	B	17172	17426	16836	513350	496120	487180	1.12706	29.0985	4.86287	up
pmf0297	C20H42O	1-Eicosanol	Lipids	Glycerol ester	629-96-9	B	13281	13462	13396	256500	319900	349720	1.12516	23.0728	4.52812	up
pme0181	C7H11N3O2	1-Methylhistidine	Amino acids and derivatives	Amino acids and derivatives	368-16-1	A	1137000	1052600	943260	356510	326650	321220	1.12032	0.320595	-1.64118	down
pmn001420	C15H18O9	1-O-[(E)-Caffeoyl]-D-glucose	Phenolic acids	Phenolic acids	-	B	1151700	1384900	1243100	608370	655740	590600	1.11032	0.490703	-1.02708	down
pmn001518	C13H16O10	1-O-Galloyl-D-glucose*	Phenolic acids	Phenolic acids	58511-73-2	A	5710600	5793600	5783800	2860600	2815100	2632700	1.12435	0.480588	-1.05713	down
Lmhp011562	C21H36O4	1-α-Linolenoyl-glycerol	Lipids	Glycerol ester	-	A	696990	734120	638290	169540	157580	165600	1.12478	0.238098	-2.07037	down
Lmhp009773	C27H46O9	1-α-Linolenoyl-glycerol-glucoside*	Lipids	Glycerol ester	-	A	2431	2883.3	2360.1	11956	10617	11915	1.12188	4.4939	2.16797	up
pme3083	C8H7NO3	2-(Formylamino)benzoic acid	Phenolic acids	Phenolic acids	3342-77-6	A	13020	13031	11717	215110	294490	216130	1.12391	19.2155	4.2642	up
pmp001276	C33H56O14	2,3-Dihydroxypropyl-9,12,15-octadecatrienoate-hexose-hexose	Lipids	Free fatty acids	-	A	809520	719200	762630	2410000	2435000	2266000	1.12411	3.10341	1.63385	up
mws0340	C6H8O4	2,3-Dimethylsuccinic acid	Amino acids and derivatives	Amino acids and derivatives	13545-04-5	B	4384.1	2655.6	2784.3	8744.5	11451	11145	1.07688	3.1902	1.67365	up
Lmfn000797	C20H20O14	2,3-Di-O-Galloyl-D-Glucose*	Tannins	Tannin	-	A	263930	277440	279310	28672	21992	27246	1.12424	0.0949335	-3.39694	down
Xmbp001692	C7H6O5	2,4,6-Trihydroxybenzoic acid	Organic acids	Organic acids	-	A	2631100	3023200	2567900	9	9	9	1.12709	3.28379e-06	-18.2162	down
mws0236	C2H7NO3S	2-Aminoethanesulfonic acid	Organic acids	Organic acids	107-35-7	B	7532.3	9087.2	6270.8	20246	21042	14407	1.05918	2.43313	1.28281	up
pmb0302	C2H8NO3P	2-Aminoethylphosphonate	Lipids	Glycerol ester	2041-14-7	A	96611	96154	125000	33450	40500	53290	1.06477	0.400422	-1.32041	down
pme3017	C4H9NO2	2-Aminoisobutyric acid	Amino acids and derivatives	Amino acids and derivatives	62-57-7	B	3767500	3741000	3599100	9432900	9810700	10247000	1.12527	2.65499	1.40871	up
pmb2507	C5H11O7P	2-Deoxyribose-1-phosphate	Nucleotides and derivatives	Nucleotides and derivatives	17210-42-3	B	190220	166000	183040	512950	425860	456680	1.11587	2.58779	1.37172	up
Cmln001085	C12H23NO10S2	2-Hydroxy-2-Methylbutyl Glucosinolate	Others	Glucosinolates	36286-64-3	B	1159400	1245100	1105500	430280	483470	431930	1.12077	0.383385	-1.38314	down
Lmrn003000	C9H10O3	2-Hydroxy-3-phenylpropanoic acid	Organic acids	Organic acids	7326-19-4	B	13148	13771	14616	30116	30906	39487	1.10348	2.41986	1.27493	up
pmp001274	C28H48NO7P	2-Hydroxy-5,8,11,14,17-icosapentaenoyloxy]propyl-2-(trimethylammonio)ethyl phosphate	Alkaloids	Alkaloids	-	B	249480	216470	198090	4332700	4340300	4239500	1.1259	19.4454	4.28135	up
Lmmn001643	C9H8O3	2-Hydroxycinnamic acid*	Organic acids	Organic acids	583-17-5	A	65579	53162	69760	1208200	1156200	1331200	1.12499	19.6052	4.29316	up
Lmmn003323	C16H32O3	2-Hydroxyhexadecanoic acid	Organic acids	Organic acids	764-67-0	B	88604	79576	103920	564370	597560	583850	1.12308	6.41595	2.68166	up
mws0574	C4H8O3	2-Hydroxyisobutyric acid	Organic acids	Organic acids	594-61-6	B	4927.3	5941.7	6429.3	22297	20637	23579	1.11794	3.84506	1.94301	up
pmb3101	C7H12O5	2-Isopropylmalate	Organic acids	Organic acids	-	A	8029300	8207000	7501000	3847400	3743700	3646800	1.12326	0.473428	-1.07878	down
mws0473	C5H8O4	2-Methylsuccinic acid*	Organic acids	Organic acids	498-21-5	A	408060	342070	343740	1340700	1492000	1366700	1.12147	3.83903	1.94074	up
pme2589	C6H8O5	2-Oxoadipic acid	Organic acids	Organic acids	3184-35-8	B	108900	117180	111870	36981	45736	43046	1.11714	0.372135	-1.4261	down
pme1216	C6H5NO2	2-Picolinic acid*	Organic acids	Organic acids	98-98-6	A	45884	46426	39894	306120	363630	319820	1.12424	7.48517	2.90404	up
Zmyn005384	C18H36O3	2R-Hydroxyoctadecanoic Acid	Lipids	Free fatty acids	26633-48-7	B	8477.8	8401.1	8413.2	38434	39059	37390	1.12694	4.54225	2.18341	up
Lmhp011388	C21H36O4	2-γ-Linolenoyl-glycerol*	Lipids	Glycerol ester	-	A	641230	604650	545880	284210	275830	292350	1.11713	0.475728	-1.07179	down
Lmhp008513	C33H56O14	2-γ-Linolenoyl-glycerol-diglucoside*	Lipids	Glycerol ester	-	A	6949.1	6282.1	4516.4	14077	15061	13303	1.07791	2.39137	1.25783	up
mws0467	C9H10O3	3-(4-Hydroxyphenyl)-propionic acid	Phenolic acids	Phenolic acids	501-97-3	B	2997	1831.5	602	57275	77904	58375	1.09102	35.642	5.15551	up
Cmcp001482	C30H26O14	3,3',4',5,5',7-Hexahydroxyflavan(4→8)-3,3',4',5,5',7-hexahydroxyflavan;(2R,2'R,3S,3'R,4S)-form	Flavonoids	Biflavones	68964-95-4	B	32072000	29392000	27343000	707060	857960	516710	1.12346	0.0234411	-5.41482	down
Cmcp002323	C37H30O17	3,3',4',5,5',7-Hexahydroxyflavan(4→8)-3,3',4',5,5',7-hexahydroxyflavan;(all-R)-form,3''-Deoxy,3'-O-(3,4,5-trihydroxybenzoyl)	Flavonoids	Biflavones	126715-89-7	B	7803400	8087100	7243100	721990	940160	783290	1.12406	0.105709	-3.24182	down
Cmcp002716	C21H20O13	3,3',4',5,5',7-Hexahydroxyflavone;3'-O-β-D-Glucopyranoside	Flavonoids	Flavonoid	520-14-9	A	7205600	7660500	7684400	3226200	3278900	2969000	1.12299	0.420128	-1.2511	down
Cmcp003418	C44H34O20	3,3',4',5,7-Pentahydroxyflavan-(4→6)-3,3',4',5,7-pentahydroxyflavan;(2R,2'R,3R,3'R,4R)-form,3,3'-Bis-O-(3,4,5-trihydroxybenzoyl)	Flavonoids	Biflavones	106533-60-2	B	1129200	1223500	1008900	417620	418110	499100	1.10998	0.397082	-1.33249	down
Cmcp003078	C44H34O21	3,3',4',5,7-Pentahydroxyflavan(4→6)-3,3',4',5,7-pentahydroxyflavan;(2R,2'R,3R,3'R,4R)-form,5''-Hydroxy,3,3'-bis-O-(3,4,5-trihydroxybenzoyl)	Flavonoids	Biflavones	126715-92-2	B	614040	692000	577690	58565	58263	53570	1.12571	0.0904578	-3.46661	down
Cmcp002861	C44H34O20	3,3',4',5,7-Pentahydroxyflavan(4→8)-3,3',4',5,7-pentahydroxyflavan;(2R,2'R,3R,3'R,4R)-form,3,3'-Bis-O-(3,4,5-trihydroxybenzoyl)	Flavonoids	Biflavones	79907-44-1	B	887150	867060	765690	342320	382490	350840	1.11741	0.426862	-1.22816	down
Cmcp003380	C23H20O10	3,3',4',5,7-Pentahydroxyflavan;(2R,3R)-form,3-O-(3,4-Dihydroxy-5-methoxybenzoyl)	Flavonoids	Flavanols	83104-86-3	B	831260	919430	957480	438070	471660	425360	1.11502	0.492986	-1.02038	down
Lmgp004167	C15H14O6	3',4,4',5,7-Pentahydroxyflavan (Luteoforol)	Flavonoids	Flavonoid	13392-26-2	B	11325000	12118000	12282000	2383400	2584100	2161800	1.12431	0.199561	-2.3251	down
Cmcp002131	C44H34O19	3,4',5,7-Tetrahydroxyflavan(4→6)-3,3',4',5,7-pentahydroxyflavan;(all-R)-form,3,3''-Bis-O-(3,4,5-trihydroxybenzoyl)	Flavonoids	Biflavones	252185-32-3	B	5058800	5167700	5242800	2357700	2675200	2519700	1.12096	0.488232	-1.03436	down
Li512115	C25H24O12	3,4-Dicaffeoylquinic acid	Phenolic acids	Phenolic acids	14534-61-3	A	2635300	2631800	1881300	925140	907920	1078400	1.08539	0.407288	-1.29588	down
Hmgn001653	C7H6O3	3,4-Dihydroxybenzaldehyde	Phenolic acids	Phenolic acids	139-85-5	B	78919	94277	107490	492350	500870	455360	1.11996	5.16086	2.36761	up
pmb2620	C11H12O4	3,4-Dimethoxycinnamic acid	Phenolic acids	Phenolic acids	14737-89-4	B	178520	188950	172950	4197.8	5163.5	5111.2	1.12626	0.0267801	-5.2227	down
Lmtp003948	C22H24O12	3',5',5,7-Tetrahydroxy-4'-methoxyflavanone-3'-O-glucoside	Flavonoids	Flavonoid	-	B	7471700	7254900	7469500	2882700	2929700	2714500	1.12562	0.384162	-1.38021	down
pmn001525	C23H26O11	3,5-Di-O-galloylshikimic acid	Phenolic acids	Phenolic acids	95753-52-9	B	54250	59938	46817	14704	16672	19322	1.10847	0.314885	-1.6671	down
pmp001277	C21H44NO7P	3-{(2-Aminoethoxy)(hydroxy)phosphoryl]oxy}-2-hydroxypropyl palmitate*	Alkaloids	Alkaloids	-	B	1434800	1434300	1369400	9753100	10102000	9866400	1.1269	7.01227	2.80988	up
pmp001280	C23H46NO7P	3-{[(2-Aminoethoxy)(hydroxy)phosphoryl]oxy}-2-hydroxypropyl-9,12-octadecenoate*	Alkaloids	Alkaloids	-	A	129390	126210	118370	327470	332470	326630	1.12531	2.6381	1.3995	up
mws0874	C10H14N5O7P	3'-Adenylic Acid*	Nucleotides and derivatives	Nucleotides and derivatives	84-21-9	B	10026	11769	13633	161980	217010	173160	1.12247	15.5851	3.9621	up
mws0444	C7H7NO3	3-Aminosalicylic acid	Phenolic acids	Phenolic acids	570-23-0	B	4802.3	3608.6	4521.5	22171	19462	22851	1.11854	4.98624	2.31795	up
Lmbn000198	C4H6O5	3-Dehydro-L-Threonic Acid	Organic acids	Organic acids	-	A	31797000	32347000	31959000	15076000	15395000	15308000	1.12687	0.476353	-1.0699	down
ML10176345	C7H8O5	3-Dehydroshikimic acid	Organic acids	Organic acids	2922-42-1	B	327240	346100	411520	2066300	1917400	1932600	1.12311	5.45351	2.44719	up
Lmbn002739	C9H8O3	3-Hydroxycinnamic Acid*	Phenolic acids	Phenolic acids	14755-02-3	B	447920	592140	473470	9	9	9	1.12698	1.78391e-05	-15.7746	down
pme2601	C3H6O3	3-Hydroxypropanoic acid	Organic acids	Organic acids	503-66-2	B	16613	12881	14830	6273.9	5080.7	8228.4	1.05363	0.441815	-1.17849	down
pmp001275	C31H61O14N	3-Hydroxypropyl palmitate glc-glucosamine	Alkaloids	Alkaloids	-	A	185650	189190	210950	862960	757400	843050	1.12377	4.20528	2.0722	up
pmb0819	C10H8N2	3-Indoleacetonitrile	Alkaloids	Plumerane	771-51-7	B	11946	13561	11993	48075	49066	52477	1.12433	3.98981	1.99632	up
Hmmp001310	C11H9NO2	3-Indoleacrylic acid	Alkaloids	Alkaloids	1204-06-4	B	1754100	1805200	1599300	4946200	4619500	4702100	1.12334	2.76583	1.46771	up
pme2244	C11H11NO2	3-Indolepropionic acid	Alkaloids	Plumerane	830-96-6	B	15726	19601	13347	38825	43478	34416	1.08092	2.39797	1.26182	up
mws0823	C5H8O3	3-Methyl-2-Oxobutanoic acid	Organic acids	Organic acids	759-05-7	A	46055	42132	40686	19146	23554	19902	1.10497	0.485765	-1.04167	down
Lmmn004145	C38H60O10	3-O-(2-O-Acetyl-glucosyl)oleanolic acid	Terpenoids	Triterpene	-	B	156140	134400	147630	405660	359710	395450	1.1195	2.64925	1.40558	up
Cmcp002903	C23H20O11	3-O-(3,4-Dihydroxy-5-methoxybenzoyl)3,3',4',5,5',7-Hexahydroxyflavan	Flavonoids	Flavanols	-	A	650570	712150	690140	27667	28584	33932	1.12601	0.0439304	-4.50864	down
Zmhn003297	C21H20O14	3-O-Digalloyl quinic acid	Phenolic acids	Phenolic acids	-	B	23613000	23499000	20756000	7761700	8707600	8648700	1.12009	0.370101	-1.43401	down
pme0309	C8H8O5	3-O-Methylgallate	Tannins	Tannin	99-24-1	A	956990	934880	861360	98593	61284	68894	1.11943	0.0830919	-3.58915	down
Hmtp000776	C8H9NO3	4,5,6-Trihydroxy-2-cyclohexen-1-ylideneacetonitrile	Alkaloids	Alkaloids	-	B	103350	94614	106790	2811800	2836900	2790600	1.12685	27.6922	4.79141	up
pmp000004	C17H14O7	4',5,7-Trihydroxy-3',6-dimethoxyflavone (Jaceosidin)	Flavonoids	Flavonoid	18085-97-7	B	173140	156320	174930	871010	985430	907760	1.12503	5.48028	2.45425	up
mws1336	C7H7NO2	4-Aminobenzoic acid	Phenolic acids	Phenolic acids	150-13-0	B	501390	465140	517640	18038	15474	17484	1.12647	0.0343599	-4.86313	down
mws0749	C7H6O3	4-Hydroxybenzoic acid	Phenolic acids	Phenolic acids	99-96-7	B	145000	117130	112950	32797	33556	25710	1.11244	0.245449	-2.0265	down
HJN037	C8H8O5	4-Methoxy-3,5-dihydroxybenzoic acid	Phenolic acids	Phenolic acids	-	B	803820	848880	791450	60245	59533	98495	1.11664	0.0893043	-3.48513	down
pmb2795	C10H10O3	4-Methoxycinnamic acid	Phenolic acids	Phenolic acids	830-09-1	B	545750	530580	504070	59593	50571	51751	1.12574	0.102452	-3.28698	down
pmb0764	C6H9NOS	4-Methyl-5-thiazoleethanol	Others	Others	137-00-8	B	17403	15391	19683	31803	49277	38063	1.06017	2.27039	1.18294	up
Lmbn002644	C8H8O	4-Methylbenzaldehyde	Others	Others	104-87-0	B	9	9	9	28786	39175	36801	1.12682	3880.07	11.9219	up
pme2828	C6H5NO3	4-Nitrophenol	Phenolic acids	Phenolic acids	100-02-7	B	39590000	39410000	38901000	13512000	14269000	15350000	1.12406	0.365824	-1.45078	down
Zmhn002032	C28H34O15	4-O-(6'-O-Glucosylcaffeoylglucosyl)-4-hydroxybenzyl alcohol	Phenolic acids	Phenolic acids	-	B	10186	10884	10087	9	9	9	1.1271	0.000866579	-10.1724	down
pmb0885	C18H26O3	4-O-9Z,11Z,13E,15E-octadecatetraenoic acid	Lipids	Glycerol ester	-	A	5395.6	3577.9	3845.6	28135	28438	30303	1.11706	6.77707	2.76066	up
Zmhn000892	C13H18O8	4-O-Glucosyl-3,4-dihydroxybenzyl alcohol	Phenolic acids	Phenolic acids	-	B	547590	526660	504120	185810	189500	192780	1.12572	0.359922	-1.47424	down
pme0275	C5H7O3-	4-Oxopentanoate	Organic acids	Organic acids	123-76-2	B	7969.3	9596.7	8135.5	4218.9	3233.5	4830.4	1.06272	0.477902	-1.06521	down
Hmtn001120	C14H20O8	5-(2-Hydroxyethyl)-2-O-glucosylohenol*	Phenolic acids	Phenolic acids	-	B	118620	99226	181350	51137	26081	25247	1.03839	0.256678	-1.96197	down
Hmqn003268	C15H12O7	5,7,3',4',5'-Pentahydroxydihydroflavone	Flavonoids	Dihydroflavone	-	B	3977800	4116800	4939600	493980	578130	384310	1.11858	0.111738	-3.1618	down
Lmgp004731	C21H20O10	5,7,4'-Trihydroxyisoflavone-7-O-galactoside*	Flavonoids	Isoflavones	-	A	1622400	1625600	1748900	505590	485860	483030	1.12585	0.295079	-1.76083	down
Zmhn001102	C14H16O8	5,7-Dihydroxy-1(3H)-isobenzofuran-one-O-glucoside	Others	Others	-	B	226670	198350	114290	1665300	1255500	844980	1.08076	6.98259	2.80376	up
pma3649	C5H9NO3	5-Aminolevulinate	Alkaloids	Alkaloids	106-60-5	B	78210	84989	85271	1878300	1746900	1759900	1.12685	21.673	4.43783	up
Hmln002355	C27H34O12	5'-Methoxymatairesinoside	Lignans and Coumarins	Lignans	1691201-82-7	B	101240	120660	98001	34598	34708	32418	1.11912	0.317986	-1.65297	down
pme1187	C10H14N2O6	5-Methyluridine	Nucleotides and derivatives	Nucleotides and derivatives	1463-10-1	B	28085	22489	21034	49954	57069	47516	1.0887	2.15812	1.10978	up
Hmln002806	C16H16O8	5-O-Caffeoylshikimic acid	Phenolic acids	Phenolic acids	180981-12-8	B	53307	70676	65015	25026	24796	29450	1.09752	0.419433	-1.25349	down
pmb3066	C22H26O12	5-O-p-Coumaroyl shikimic acid O-hexoside	Phenolic acids	Phenolic acids	-	B	174800	146760	121480	14806	10557	9866.1	1.11791	0.0795167	-3.6526	down
Lmbn004685	C18H32O4	5S,8R-DiHODE; (5S,8R,9Z,12Z)-5,8-Dihydroxyoctadeca-9,12-dienoate	Lipids	Free fatty acids	-	B	8778.5	7587.6	8058.7	25512	28178	26965	1.12289	3.30218	1.72342	up
Zmhp003514	C16H12O6	6,7,8-Tetrahydroxy-5-methoxyflavone	Flavonoids	Flavonoid	-	B	23319	25876	25969	61097	69027	62132	1.12029	2.55782	1.35491	up
pme0274	C6H13NO2	6-Aminocaproic acid	Organic acids	Organic acids	60-32-2	B	242260	180350	169510	5158200	5154400	5066800	1.12448	25.9735	4.69897	up
pmp001198	C6H13NO2	6-Deoxyfagomine*	Alkaloids	Alkaloids	197449-09-5	A	1165100	1136300	1575400	22292000	18235000	17079000	1.12187	14.8592	3.89328	up
mws0972	C6H12O3	6-Hydroxyhexanoic acid	Organic acids	Organic acids	1191-25-9	B	6145.6	8146.5	5817.7	25738	22786	18948	1.09948	3.35518	1.74639	up
Lmpn007255	C16H12O8	6-Methoxyquercetin	Flavonoids	Flavonols	519-96-0	B	7983.3	7224.3	8947.4	27944	28281	25301	1.11951	3.37512	1.75494	up
pmc0274	C6H6N4S	6-Methylmercaptopurine	Nucleotides and derivatives	Nucleotides and derivatives	50-66-8	B	568790	555710	589730	14892000	15331000	15411000	1.12704	26.6207	4.73448	up
Zmhn001793	C15H18O9	6-O-Caffeoyl-D-glucose	Phenolic acids	Phenolic acids	-	B	3534800	3718300	3632800	759630	914350	794820	1.12382	0.226789	-2.14058	down
Lmbn005287	C18H32O4	7S,8S-DiHODE; (9Z,12Z)-(7S,8S)-Dihydroxyoctadeca-9,12-dienoic acid	Lipids	Free fatty acids	143288-65-7	B	28734	33918	37199	65663	70549	72019	1.10155	2.08542	1.06034	up
pmb2636	C20H32O4	8,15-DiHETE	Lipids	Glycerol ester	77667-08-4	B	9	9	9	105310	104770	100800	1.12712	11514.1	13.4911	up
Lmmp003672	C31H28O12	8,8'-Methylenebiscatechin	Flavonoids	Flavanols	81555-08-0	B	198880	198380	233650	52973	50102	50246	1.12338	0.243016	-2.04088	down
mws1060	C10H12N4O5	9-(Arabinofuranosyl)hypoxanthine	Nucleotides and derivatives	Nucleotides and derivatives	7013-16-3	A	35293	39425	25898	333340	349600	339550	1.1205	10.1623	3.34516	up
pmn001694	C18H34O5	9,10,13-Trihyroxy-11-octadecadienoic acid	Lipids	Free fatty acids	-	A	46202	45643	49940	1186700	1220900	1158100	1.12691	25.1486	4.65241	up
pmn001691	C18H32O5	9,12,13-Trihyroxy-10,15-octadecadienoic acid	Lipids	Free fatty acids	-	A	9	9	9	388020	392210	375230	1.12712	42794.8	15.3851	up
Zmjn004133	C18H32O4	9-HpODE*	Others	Others	5502-91-0	B	14469	11047	18443	427800	432220	408900	1.12278	28.866	4.8513	up
pmb2791	C18H30O4	9-HpOTrE	Lipids	Glycerol ester	111004-08-1	B	86413	43082	32230	200040	165930	148750	1.01059	3.18269	1.67025	up
pmn001689	C18H32O4	9-Hydroxy-12-oxo-15(Z)-octadecenoic acid	Lipids	Free fatty acids	-	B	8852.4	7780.8	8322.2	27372	28356	27182	1.12461	3.32233	1.73219	up
pmb2787	C18H30O3	9-Oxo-10E,12Z-octadecadienoic acid	Lipids	Free fatty acids	54232-59-6	B	4509.1	3283	2510.8	98313	101160	96984	1.12138	28.7741	4.8467	up
Rfmb091	C18H32O3	9S-Hydroxy-10E,12Z-octadecadienoic acid	Lipids	Free fatty acids	15514-85-9	A	189560	174460	165730	5850900	5707500	5912200	1.1268	32.979	5.04347	up
Lmtn004049	C15H20O4	Abscisic acid	Organic acids	Organic acids	21293-29-8	B	393560	391790	397670	3690100	3421600	3639600	1.1269	9.08801	3.18396	up
pme0040	C5H5N5	Adenine	Nucleotides and derivatives	Nucleotides and derivatives	73-24-5	A	2785100	2386800	2373000	46719000	47404000	47356000	1.12635	18.7516	4.22894	up
pme2117	C10H15N5O10P2	Adenosine 5'-Diphosphate	Nucleotides and derivatives	Nucleotides and derivatives	58-64-0	A	115220	116030	82438	57817	43212	38829	1.04489	0.445851	-1.16537	down
pmb0981	C10H14N5O7P	Adenosine 5'-monophosphate	Nucleotides and derivatives	Nucleotides and derivatives	61-19-8	A	795010	798600	769760	3076700	2710600	2336100	1.11759	3.43721	1.78124	up
pme0230	C10H13N5O4	Adenosine*	Nucleotides and derivatives	Nucleotides and derivatives	58-61-7	A	632580	592680	639000	1331400	1417400	1405100	1.12378	2.22818	1.15586	up
pme3285	C15H14O5	Afzelechin(3,5,7,4'-Tetrahydroxyflavan)	Flavonoids	Flavanols	2545-00-8	A	186210	179290	211810	47849	56652	59512	1.11746	0.284099	-1.81554	down
mws5037	C9H18N2O3	Alanylleucine	Amino acids and derivatives	Amino acids and derivatives	1999-42-4	B	28310	32758	34569	9	9	9	1.12699	0.000282318	-11.7904	down
pme1173	C5H4N4O	Allopurinol	Nucleotides and derivatives	Nucleotides and derivatives	315-30-0	B	22723	19473	15630	93485	89642	97802	1.1161	4.85818	2.28042	up
mws0237	C9H16O4	Anchoic Acid	Organic acids	Organic acids	123-99-9	A	346190	350640	374680	969550	1041200	944550	1.12395	2.75807	1.46366	up
pmb2654	C19H27NO12	Anthranilate O-hexosyl-O-hexoside	Phenolic acids	Phenolic acids	-	B	319040	324500	237680	57951	58096	58177	1.11845	0.197708	-2.33856	down
Lmgp004784	C15H14O5	Apiferol	Flavonoids	Flavonoid	-	A	4409200	5266100	5021000	660850	779800	674460	1.12382	0.143921	-2.79665	down
pmp000571	C15H10O5	Apigenin*	Flavonoids	Flavonoid	520-36-5	A	8984.1	8819.6	11442	40896	39639	37743	1.11865	4.04429	2.01589	up
pmp000237	C26H26O15	Apigenin-6-C-2-glucuronylxyloside	Flavonoids	Flavonoid carbonoside	-	A	168610	258320	266250	47079	57816	80362	1.0719	0.267257	-1.9037	down
mws1434	C21H20O10	Apigenin-6-C-glucoside (Isovitexin)	Flavonoids	Flavonoid carbonoside	29702-25-8	A	891500	726990	831880	434520	358380	382770	1.09979	0.479793	-1.05952	down
pmn001492	C11H8O3	Ayapin	Lignans and Coumarins	Coumarins	494-56-4	B	26766	26422	23983	58001	61166	60526	1.12244	2.3285	1.2194	up
mws0489	C8H6O3	Benzoylformic acid	Organic acids	Organic acids	611-73-4	B	17484	12205	14610	31828	28190	32417	1.07863	2.08662	1.06117	up
Cmjn004337	C18H26O10	Benzyl-(2''-O-xylosyl)glucoside	Phenolic acids	Phenolic acids	-	B	45631	34217	59572	9691	13146	8464.8	1.08619	0.224514	-2.15512	down
Hmjn003484	C24H38O4	Bis(2-ethylhexyl)phthalate	Phenolic acids	Phenolic acids	-	B	9	9	9	21735	23863	20219	1.12703	2437.67	11.2513	up
pmp001279	C21H48N3O9P	Bis(N,N-diethylethanaminium)-2-acetamido-1,5-anhydro-2-deoxy-1-[-hydroxy(phosphonato)methyl]-D-glucitol	Alkaloids	Alkaloids	-	B	482450	434370	379820	10087000	9208300	9722800	1.12582	22.3795	4.4841	up
mws2212	C9H8O4	Caffeic acid	Phenolic acids	Phenolic acids	331-39-5	A	27167	29674	41350	1658400	1717800	1550700	1.12468	50.1767	5.64895	up
pmb0142	C9H8O3	Caffeic aldehyde	Phenolic acids	Phenolic acids	141632-15-7	B	165740	203030	209170	25583	21507	27642	1.12115	0.129308	-2.95112	down
Lmhn001773	C19H13NO10	Caffeoylnicotinoyltartaric acid	Phenolic acids	Phenolic acids	-	B	88790	88395	106690	9	9	9	1.12702	9.51123e-05	-13.36	down
mws0054	C15H14O6	Catechin	Flavonoids	Flavanols	154-23-4	A	2786400	2648200	2588500	950110	847110	954350	1.1232	0.342956	-1.5439	down
pmn001416	C24H20O9	Catechin-(7,8-bc)-4α-(3,4-dihydroxyphenyl)-dihydro-2-(3H)-one	Flavonoids	Flavanols	-	B	1527100	1389900	1411100	336910	438600	439640	1.11551	0.280758	-1.8326	down
pmb2947	C45H38O18	Catechin-catechin-catechin*	Flavonoids	Flavanols	-	A	2480600	3021000	2647600	456930	620520	589030	1.11638	0.204496	-2.28985	down
pmb0680	C36H36O17	C-Hexosyl-apigenin O-p-coumaroylhexoside	Flavonoids	Flavonoid carbonoside	-	B	37689	39709	44380	14992	16751	21887	1.08112	0.440392	-1.18314	down
mws0178	C16H18O9	Chlorogenic acid*	Phenolic acids	Phenolic acids	327-97-9	A	293670	260160	257040	130370	109050	126390	1.11031	0.451133	-1.14838	down
Lmyp005841	C21H20O9	Chrysin-7-O-glucoside	Flavonoids	Flavonoid	-	B	11114	10728	14109	4967.4	4556.3	3574.4	1.09116	0.364332	-1.45667	down
pmp001127	C16H12O6	Chrysoeriol	Flavonoids	Flavonoid	491-71-4	B	22208	27304	30947	71803	77708	73203	1.10668	2.76804	1.46887	up
pmb3012	C22H22O11	Chrysoeriol-7-O-glucoside	Flavonoids	Flavonoid	19993-32-9	B	73550	67374	115500	11650	17649	17145	1.09288	0.181122	-2.46497	down
mws0383	C17H32O2	Cis-10-Heptadecenoic Acid	Lipids	Free fatty acids	29743-97-3	A	193710	185990	223200	851220	889510	964810	1.12281	4.48754	2.16593	up
pmb2211	C19H38N2O3	Cocamidopropyl betaine	Alkaloids	Alkaloids	4292-10-8	A	22135	21054	31660	85718	85379	100740	1.10233	3.63181	1.86069	up
mws0009	C10H10O3	Coniferaldehyde	Phenolic acids	Phenolic acids	20649-42-7	A	28705	24292	33803	104720	120570	109350	1.11403	3.8553	1.94684	up
mws0093	C10H12O3	Coniferyl alcohol	Phenolic acids	Phenolic acids	458-35-5	B	159960	200810	180100	812820	1140000	882910	1.11512	5.2429	2.39037	up
Lmbn005923	C18H30O2	Crepenynic acid	Lipids	Free fatty acids	2277-31-8	B	94383	93505	93611	318900	329200	304940	1.12633	3.38559	1.75941	up
pme1777	C27H31O16+	Cyanidin-3,5-O-diglucoside (Cyanin)*	Flavonoids	Anthocyanins	2611-67-8	B	26628000	33269000	29019000	645150	852020	633080	1.12499	0.023958	-5.38335	down
Zmcp002924	C27H31O16+	Cyanidin-3-O-(2''-O-glucosyl)glucoside	Flavonoids	Anthocyanins	38820-68-7	B	17284000	18168000	18992000	386950	432760	330780	1.12612	0.0211316	-5.56445	down
Lmjp002491	C35H35O17+	Cyanidin-3-O-(6''-O-p-coumaroyl-2''-O-xylosyl)glucoside	Flavonoids	Anthocyanins	-	B	27111	21723	23669	92853	97397	81779	1.1182	3.75197	1.90765	up
pme1773	C27H31O15+	Cyanidin-3-O-rutinoside (Keracyanin)	Flavonoids	Anthocyanins	28338-59-2	A	4888600	5195900	4514700	458010	586740	474630	1.12389	0.104073	-3.26433	down
mws0884	C10H12N5O6P	Cyclic AMP	Nucleotides and derivatives	Nucleotides and derivatives	60-92-4	A	67701	21418	21469	7002500	9282300	7003900	1.11547	210.59	7.71829	up
pme3732	C9H13N3O5	Cytidine	Nucleotides and derivatives	Nucleotides and derivatives	65-46-3	A	618720	614150	588910	18760000	16872000	17160000	1.12688	28.9783	4.8569	up
pme3174	C9H14N3O8P	Cytidine 5'-monophosphate(Cytidylic acid)	Nucleotides and derivatives	Nucleotides and derivatives	63-37-6	B	19000	14509	15828	223210	320040	403360	1.11772	19.1866	4.26203	up
mws0255	C4H5N3O	Cytosine	Nucleotides and derivatives	Nucleotides and derivatives	71-30-7	A	255990	254050	261930	3003900	2945600	3090100	1.12704	11.7098	3.54964	up
mws1499	C5H10O5	D-(-)-Arabinose	Others	Saccharides and Alcohols	10323-20-3	B	269620	231610	212760	555400	563590	502020	1.10703	2.27035	1.18292	up
pmb2653	C24H42O20	D(+)-Melezitose O-rhamnoside	Others	Saccharides and Alcohols	-	B	502840	566060	610160	28264	39883	32166	1.12343	0.0597435	-4.06507	down
pme0500	C18H32O16	D-(+)-Melezitose*	Others	Saccharides and Alcohols	597-12-6	B	284680	172140	193700	16152	32295	30782	1.09279	0.121793	-3.03749	down
pme0519	C12H22O11	D-(+)-Sucrose*	Others	Saccharides and Alcohols	57-50-1	A	3881500	4830600	4198800	220970	198140	198900	1.12576	0.0478673	-4.38482	down
pme1398	C21H21O12+	Delphinidin-3-O-glucoside (Mirtillin)	Flavonoids	Anthocyanins	50986-17-9	B	225780	283400	272640	103270	67791	75597	1.09369	0.315492	-1.66432	down
pme3961	C10H13N5O3	Deoxyadenosine*	Nucleotides and derivatives	Nucleotides and derivatives	958-09-8	A	484420	469860	470900	10131	14684	6366.1	1.11858	0.0218787	-5.51433	down
pme1730	C4H6O4	D-Erythronolactone	Organic acids	Organic acids	15667-21-7	B	920140	1003100	809140	25066	19812	21502	1.12569	0.0242938	-5.36327	down
mws1164	C6H12O6	D-Fructose	Others	Saccharides and Alcohols	7660-25-5	A	1636900	1402600	1534900	6217000	5439000	5355200	1.12158	3.71878	1.89483	up
mws0866	C6H13O9P	D-Glucose 6-phosphate*	Others	Saccharides and Alcohols	56-73-5	A	3335900	3685800	3412000	1199800	1134200	1255300	1.12353	0.34401	-1.53948	down
mws4170	C6H12O6	D-Glucose*	Others	Saccharides and Alcohols	14431-43-7	A	1481700	1229000	1403400	5541100	5200900	5558100	1.12291	3.96201	1.98623	up
mws4175	C6H8O6	D-Glucurono-6,3-lactone*	Others	Others	32449-92-6	B	9	9	9	234980	197760	242030	1.12706	24991.5	14.6091	up
Wmhn001788	C34H26O22	Digalloyl-HHDP-glucose	Tannins	Tannin	-	B	9	9	9	136460	72487	114570	1.12626	11982.1	13.5486	up
HJN055	C21H24O10	Dihydrocharcone-4'-O-β-Dglucoside*	Others	Others	-	A	156250	142520	152330	74822	65166	83592	1.10108	0.495633	-1.01266	down
pme2710	C12H20O3	Dihydrojasmonic acid	Organic acids	Organic acids	3572-64-3	B	9	9	9	6575.9	6809.7	9750.2	1.12636	856.881	9.74295	up
Lmmn004625	C21H22O11	Dihydrokaempferol-7-O-glucoside*	Flavonoids	Flavonols	-	B	231830	254240	282440	70030	78565	66742	1.11938	0.280201	-1.83547	down
mws0744	C15H12O8	Dihydromyricetin(Ampelopsin)	Flavonoids	Dihydroflavonol	27200-12-0	A	654440	541900	659630	42832	50334	40802	1.12456	0.0721822	-3.79221	down
mws0044	C15H12O7	Dihydroquercetin(Taxifolin)	Flavonoids	Dihydroflavonol	480-18-2	A	1596300	1348800	1329800	351950	356200	322600	1.12237	0.241117	-2.0522	down
Zmhn000785	C19H32O16	Di-O-Glucosylquinic acid	Phenolic acids	Phenolic acids	-	B	568000	522230	670500	9	9	9	1.12703	1.53345e-05	-15.9929	down
mws0058	C16H12O6	Diosmetin	Flavonoids	Flavonoid	520-34-3	B	197630	195930	241690	1221100	1316400	1237700	1.12348	5.94286	2.57116	up
pmp000579	C22H22O11	Diosmetin-7-O-galactoside	Flavonoids	Flavonoid	-	A	3878400	3747600	4843700	2264700	1890300	2039200	1.08625	0.49674	-1.00944	down
pmn001610	C20H36O2	Eicosadienoic acid	Lipids	Free fatty acids	5598-38-9	A	9426.2	14526	11013	75727	83884	85225	1.1172	7.00228	2.80782	up
pmn001606	C20H38O2	Eicosenoic acid	Lipids	Free fatty acids	26764-41-0	B	1218700	1089700	1381200	2684900	2805700	2634900	1.10952	2.20227	1.13899	up
mws0396	C18H34O2	Elaidic Acid	Lipids	Free fatty acids	112-79-8	A	870120	888800	824430	6659700	6768000	6579900	1.12681	7.74483	2.95323	up
pme2246	C14H6O8	Ellagic acid	Tannins	Tannin	476-66-4	A	37674	36704	34107	862210	745290	791090	1.12651	22.1099	4.46662	up
Hmdn001667	C20H16O13	Ellagicacid-4-O-glucoside	Tannins	Tannin	-	B	33985	41911	59621	9	9	9	1.12624	0.000199237	-12.2932	down
HJN041	C21H24O11	Epicatechin glucoside	Flavonoids	Flavanols	-	B	3323400	3259700	2888500	1081500	1083200	980870	1.1217	0.332105	-1.59029	down
mws0034	C22H18O11	Epigallocatechin 3-gallate*	Flavonoids	Flavanols	989-51-5	A	6657400	5512200	5820000	1532500	1939500	2060700	1.10957	0.30755	-1.70111	down
mws0042	C15H14O7	Epigallocatechin*	Flavonoids	Flavanols	970-74-1	A	684420	752240	797080	48246	64759	50062	1.12373	0.0730018	-3.77592	down
mws0064	C15H12O6	Eriodictyol	Flavonoids	Dihydroflavone	552-58-9	A	370450	297520	279880	1598600	1688600	1620600	1.1208	5.17782	2.37235	up
HJN086	C21H22O11	Eriodictyol-3'-O-glucoside*	Flavonoids	Dihydroflavone	-	B	223570	241760	215350	70585	68768	93173	1.10715	0.341608	-1.54958	down
mws1015	C15H16O9	Esculin(6,7-DihydroxyCoumarin-6-glucoside)	Lignans and Coumarins	Coumarins	531-75-9	A	2597300	2714500	2383500	1077300	1105400	1081700	1.12254	0.424207	-1.23716	down
pme3034	C5H8O4	Ethylmalonic acid	Organic acids	Organic acids	601-75-2	B	17031	18060	14900	42461	46510	48001	1.11704	2.73993	1.45414	up
pmn001371	C27H34O12	Eucommin A	Lignans and Coumarins	Lignans	99633-12-2	A	87892	107780	91685	25936	44000	51888	1.01325	0.423947	-1.23805	down
pmn001380	C9H16O4	Eucommiol	Others	Others	55930-44-4	A	22333	17374	21026	42241	53316	53077	1.09547	2.44734	1.29121	up
mws0014	C10H10O4	Ferulic acid	Phenolic acids	Phenolic acids	537-98-4	A	34986	29115	40170	282040	367790	343430	1.12047	9.52576	3.25183	up
mws1014	C10H8O5	Fraxetin (7,8-Dihydroxy-6-methoxycoumarin)	Lignans and Coumarins	Coumarins	574-84-5	B	167680	47262	113220	9	9	9	1.12356	8.22764e-05	-13.5692	down
mws0351	C22H18O11	Gallate catechin gallate	Flavonoids	Flavanols	4233-96-9	B	6596200	5286800	6355000	1540700	1700500	1492700	1.11961	0.259562	-1.94585	down
mws0024	C7H6O5	Gallic acid	Tannins	Tannin	149-91-7	A	1011400	1071400	1137100	6772400	7412300	6790600	1.12584	6.51427	2.7036	up
mws2220	C22H18O11	Gallocatechin 3-O-gallate	Flavonoids	Flavanols	5127-64-0	B	6331500	5921400	4706100	1489400	1705000	1179000	1.10411	0.257881	-1.95522	down
mws0049	C15H14O7	Gallocatechin*	Flavonoids	Flavanols	970-73-0	A	10324000	10118000	9851700	502860	643390	536030	1.12569	0.0555323	-4.17053	down
Lmmp002068	C45H38O19	Gallocatechin-catechin-catechin	Tannins	Proanthocyanidins	-	B	4111200	4208400	3691900	194630	244090	181510	1.12477	0.0516363	-4.27547	down
Lmmp000897	C30H26O14	Gallocatechin-Gallocatechin	Flavonoids	Flavanols	-	B	142860	105760	125920	44553	31211	50733	1.07694	0.33774	-1.56602	down
Lmmp001653	C45H38O20	Gallocatechin-gallocatechin-catechin	Tannins	Proanthocyanidins	-	B	2293600	2618300	2548000	48551	67440	52672	1.12539	0.0226093	-5.46694	down
pmn001519	C15H12O9	Galloyl Methyl gallate*	Tannins	Tannin	-	A	1163400	1365700	1152400	336390	319090	303910	1.12224	0.260598	-1.9401	down
HJAP144	C52H42O22	Galloylprocyanidin C2	Tannins	Proanthocyanidins	-	B	69505	87228	67579	28193	31860	20452	1.0799	0.358897	-1.47836	down
mws1090	C6H13O9P	Glucose-1-phosphate	Others	Saccharides and Alcohols	59-56-3	A	3503800	3878500	3666400	1191400	1253800	1263800	1.12481	0.335696	-1.57477	down
pmb3107	C15H20O10	Glucosyringic Acid	Phenolic acids	Phenolic acids	-	B	14486	18631	17691	82890	68540	64638	1.11513	4.25264	2.08836	up
pme0243	C5H8O4	Glutaric acid*	Organic acids	Organic acids	110-94-1	B	447780	436160	429180	1445100	1571800	1422900	1.12536	3.38111	1.7575	up
pme1086	C10H17N3O6S	Glutathione reduced form	Amino acids and derivatives	Amino acids and derivatives	70-18-8	A	3864300	3850400	3998700	2690.6	3941.8	4320.4	1.12617	0.000935066	-10.0626	down
mws5042	C11H14N2O3	Glycylphenylalanine	Amino acids and derivatives	Amino acids and derivatives	721-66-4	A	39075	32124	42944	412110	523050	408180	1.12193	11.7689	3.55691	up
pme0066	C3H7N3O2	Guanidineacetic acid	Amino acids and derivatives	Amino acids and derivatives	352-97-6	B	11689	11234	9448.7	27827	39077	26519	1.08942	2.88595	1.52904	up
pme1109	C5H5N5O	Guanine	Nucleotides and derivatives	Nucleotides and derivatives	73-40-5	A	191030	221100	264430	544030	477410	483530	1.09256	2.22444	1.15344	up
pme1178	C10H13N5O5	Guanosine	Nucleotides and derivatives	Nucleotides and derivatives	118-00-3	A	6100700	5825300	5878100	42178000	48014000	43548000	1.12611	7.51175	2.90915	up
mws0609	C10H12N5O7P	Guanosine 3',5'-cyclic monophosphate	Nucleotides and derivatives	Nucleotides and derivatives	7665-99-8	A	110950	45932	33950	13143000	18104000	17744000	1.11745	256.723	8.00407	up
pmb0998	C10H14N5O8P	Guanosine 5'-monophosphate	Nucleotides and derivatives	Nucleotides and derivatives	85-32-5	A	67808	51580	30523	585980	708360	834330	1.10719	14.1996	3.82777	up
pmn001628	C20H18O14	Hexahydroxydiphenoylglucose	Phenolic acids	Phenolic acids	-	A	3482000	4407000	3154300	9115000	9583600	9920300	1.10253	2.59152	1.3738	up
pmp000001	C16H12O6	Hispidulin (5,7,4'-Trihydroxy-6-methoxyflavone)*	Flavonoids	Flavonoid	1447-88-7	B	175570	165170	212130	1144800	1200500	1174300	1.12334	6.36605	2.6704	up
pme2122	C5H9N3	Histamine	Amino acids and derivatives	Amino acids and derivatives	51-45-6	B	182330	186920	179840	2113800	1840400	1897600	1.1264	10.6573	3.41377	up
mws1033	C16H14O6	Homoeriodictyol	Flavonoids	Dihydroflavone	446-71-9	B	13688	20331	20796	52271	50397	51838	1.09161	2.81868	1.49502	up
pme0033	C5H4N4O	Hypoxanthine	Nucleotides and derivatives	Nucleotides and derivatives	68-94-0	B	17752	10460	11590	209430	212660	211300	1.11947	15.9135	3.99218	up
pmb1096	C8H7N	Indole	Alkaloids	Plumerane	120-72-9	A	61687	50630	56080	132980	135530	133250	1.11735	2.38579	1.25447	up
pme1651	C10H9NO2	Indole 3-acetic acid (IAA)	Alkaloids	Plumerane	87-51-4	B	153020	200950	183250	18936	26522	27833	1.1154	0.136426	-2.87381	down
mws0103	C9H7NO	Indole-3-carboxaldehyde	Alkaloids	Plumerane	487-89-8	A	38335	40369	39161	123550	130530	131510	1.12616	3.27145	1.70993	up
pmn001382	C25H24O12	Isochlorogenic acid A	Phenolic acids	Phenolic acids	2450-53-5	A	2714800	2719400	2361500	1020800	1037500	1313500	1.10013	0.43252	-1.20916	down
pme0183	C5H5N5O	Isoguanine	Nucleotides and derivatives	Nucleotides and derivatives	3373-53-3	B	75089	91949	94521	280560	263150	224300	1.10895	2.93628	1.55399	up
Lmmn002274	C26H34O11	Isolariciresinol-9'-O-glucoside	Lignans and Coumarins	Lignans	63358-12-3	B	312440	297340	281830	136430	116600	140360	1.11321	0.441213	-1.18045	down
mws5038	C12H22O11	Isomaltulose*	Others	Saccharides and Alcohols	13718-94-0	A	3639100	2306900	3796900	270790	261150	323410	1.1158	0.0877921	-3.50976	down
pmb0964	C16H23N5O5	Isopentenyladenine-7-N-glucoside	Nucleotides and derivatives	Nucleotides and derivatives	-	B	179750	224940	261980	55886	56688	54830	1.11272	0.251105	-1.99364	down
pmb0785	C9H7N	Isoquinoline	Alkaloids	Isoquinoline alkaloids	119-65-3	B	10935	15201	12166	9	9	9	1.1267	0.000704924	-10.4702	down
mws0066	C16H12O7	Isorhamnetin	Flavonoids	Flavonols	480-19-3	B	5565	3795.3	6664.6	14611	17772	15971	1.07611	3.01743	1.59332	up
Hmmp002121	C23H16O11	Isorhamnetin-3-O-gallate	Flavonoids	Flavonols	-	A	400720	484550	311010	91338	88813	119720	1.09787	0.25067	-1.99614	down
mws1068	C15H10O6	Kaempferol	Flavonoids	Flavonols	520-18-3	A	46272	51302	48384	125760	126050	123290	1.12482	2.56992	1.36172	up
pme2493	C27H30O14	Kaempferol-3,7-O-dirhamnoside(Kaempferitrin)	Flavonoids	Flavonols	482-38-2	A	1162600	1495100	1726200	341920	299600	330240	1.11212	0.221666	-2.17354	down
Xmyp004678	C32H38O19	Kaempferol-3-O-(2-O-Xylosyl-6-O-Rhamnosyl)Glucoside	Flavonoids	Flavonoid	-	A	25076	13788	32784	106350	115650	102630	1.07055	4.5309	2.1798	up
mws1290	C30H26O13	Kaempferol-3-O-(6''-p-coumaroyl)glucoside (Tiliroside)*	Flavonoids	Flavonols	20316-62-5	A	7031100	8624200	8292300	3413500	3920000	4032600	1.10115	0.474624	-1.07514	down
Xmyp004945	C33H40O20	Kaempferol-3-O-(6'''-Rhamnosyl-2'''-Glucosyl-Glucoside) (Camelliaside A)*	Flavonoids	Flavonoid	135095-52-2	A	80941	97608	92451	327410	212090	221060	1.08177	2.80649	1.48877	up
mws0913	C21H20O11	Kaempferol-3-O-galactoside (Trifolin)	Flavonoids	Flavonols	23627-87-4	A	1591300	1394400	2090800	847510	715960	703790	1.06855	0.446619	-1.16288	down
pmp001105	C33H40O20	Kaempferol-3-O-neohesperidoside-7-O-glucoside	Flavonoids	Flavonols	-	B	22465	37347	28942	14749	11141	7534.5	1.0112	0.376597	-1.40891	down
Lmyn001269	C27H30O16	Kaempferol-3-O-sophoroside	Flavonoids	Flavonoid	19895-95-5	B	454530	443270	451300	9	9	9	1.12713	2.00133e-05	-15.6087	down
Lmmn001294	C14H20O9	Koaburaside	Phenolic acids	Phenolic acids	41653-73-0	B	623130	534790	597980	253920	261340	230890	1.11669	0.424939	-1.23467	down
mws0275	C4H6O5	L-(-)-Malic acid	Organic acids	Organic acids	636-61-3	A	1409600	1512300	1416900	669680	693100	666460	1.12454	0.467696	-1.09636	down
MA10039641	C12H22O11	Lactobiose	Others	Saccharides and Alcohols	63-42-3	A	5142700	4202600	4769300	318670	310550	285820	1.12581	0.0648293	-3.94721	down
mws4176	C12H16N2O3	L-Alanyl-L-Phenylalanine	Amino acids and derivatives	Amino acids and derivatives	3061-90-3	B	16489	20241	24199	344120	401100	362070	1.1234	18.1734	4.18376	up
HJN083	C26H34O11	Lariciresinol-4'-O-glucoside	Lignans and Coumarins	Lignans	143663-00-7	B	125920	139730	109730	46516	59532	42541	1.0904	0.395836	-1.33702	down
Hmfn000531	C6H8O6	L-Ascorbic acid	Others	Vitamin	50-81-7	A	7553100	8117700	7839300	601810	559600	622900	1.1266	0.0758955	-3.71984	down
mws0001	C4H8N2O3	L-Asparagine	Amino acids and derivatives	Amino acids and derivatives	70-47-3	A	218580	246720	255300	7608500	8074400	7621800	1.12667	32.3407	5.01528	up
pmb0464	C16H27NO14	L-Aspartic acid-O-diglucoside	Amino acids and derivatives	Amino acids and derivatives	-	B	3053300	1522100	2247800	682860	921030	780450	1.03597	0.349446	-1.51686	down
mws5035	C15H22N2O3	Leucylphenylalanine	Amino acids and derivatives	Amino acids and derivatives	56217-82-4	B	48262	36401	52907	1103500	1304000	948680	1.12243	24.3962	4.60858	up
pme0193	C5H10N2O3	L-Glutamine	Amino acids and derivatives	Amino acids and derivatives	56-85-9	B	43736	40242	35055	473650	476170	444370	1.12533	11.7126	3.54999	up
pme2253	C6H10O6	L-Gulonic-γ-lactone*	Others	Saccharides and Alcohols	1128-23-0	B	455420	553600	482760	126450	148220	164470	1.11352	0.294373	-1.76428	down
mws0254	C6H9N3O2	L-Histidine	Amino acids and derivatives	Amino acids and derivatives	71-00-1	A	527390	489070	387990	2198300	2197100	2207100	1.11915	4.70113	2.23301	up
Lmbp000123	C6H13NO2S	L-Homomethionine	Amino acids and derivatives	Amino acids and derivatives	25148-30-5	B	41808	54934	39143	758170	798430	841990	1.12399	17.6516	4.14173	up
mws0671	C4H9NO3	L-Homoserine	Organic acids	Organic acids	672-15-1	B	2597600	2594800	2368000	6260700	6500800	6291200	1.12421	2.52007	1.33346	up
mws1491	C18H32O2	Linoleic acid	Lipids	Free fatty acids	60-33-3	A	10575000	10430000	11542000	38766000	41486000	37233000	1.12438	3.6097	1.85188	up
mws0258	C6H13NO2	L-Isoleucine	Amino acids and derivatives	Amino acids and derivatives	73-32-5	A	246400	227920	333300	4429800	3541400	3203100	1.11992	13.8361	3.79036	up
mws0227	C6H13NO2	L-Leucine	Amino acids and derivatives	Amino acids and derivatives	61-90-5	A	242590	223130	327610	4260700	3661700	3090900	1.12005	13.8824	3.79518	up
Lmhp002031	C12H24N2O3	L-Leucyl-L-Leucine	Amino acids and derivatives	Amino acids and derivatives	3303-31-9	B	45860	29748	42851	554610	610410	601720	1.1213	14.9144	3.89863	up
pme0026	C6H14N2O2	L-Lysine	Amino acids and derivatives	Amino acids and derivatives	56-87-1	A	38614	39154	31253	416140	432260	413090	1.12501	11.5711	3.53245	up
pmb0962	C10H22N2O4	L-Lysine butyrate	Amino acids and derivatives	Amino acids and derivatives	80407-71-2	A	544510	552670	543090	1593000	1503900	1482400	1.12606	2.7918	1.48119	up
pme1210	C5H11NO2S	L-Methionine	Amino acids and derivatives	Amino acids and derivatives	63-68-3	A	231350	275250	327720	977160	892260	989880	1.11138	3.4271	1.77699	up
pme2527	C5H12N2O2	L-Ornithine	Amino acids and derivatives	Amino acids and derivatives	70-26-8	B	39511	37449	37198	88327	91354	93541	1.12517	2.39337	1.25904	up
pme0021	C9H11NO2	L-Phenylalanine	Amino acids and derivatives	Amino acids and derivatives	63-91-2	A	105110	96067	108780	2414500	2585300	2647500	1.12665	24.6721	4.62481	up
pme0006	C5H9NO2	L-Proline	Amino acids and derivatives	Amino acids and derivatives	147-85-3	A	1125400	1053600	932870	6893800	7158700	7244800	1.12509	6.84389	2.77482	up
Lmhp001461	C11H20N2O3	L-Prolyl-L-Leucine	Amino acids and derivatives	Amino acids and derivatives	52899-07-7	B	19146	32155	36930	90739	118890	88318	1.06228	3.3769	1.7557	up
Lmhp001732	C14H18N2O3	L-Prolyl-L-Phenylalanine	Amino acids and derivatives	Amino acids and derivatives	13589-02-1	B	20297	24644	27311	483350	432520	418980	1.12474	18.4749	4.2075	up
mws0263	C5H7NO3	L-PyroglutamicAcid	Amino acids and derivatives	Amino acids and derivatives	98-79-3	A	7792.4	5894	11038	22804	23076	20196	1.05794	2.6725	1.41819	up
pme0010	C3H7NO3	L-Serine	Amino acids and derivatives	Amino acids and derivatives	56-45-1	A	2371000	2546600	2392400	5410300	5658800	5369900	1.12448	2.24884	1.16918	up
Lmrj001698	C9H18N2O4	L-Seryl-L-Isoleucine	Amino acids and derivatives	Amino acids and derivatives	91086-51-0	B	22890	21901	27878	308080	347880	326270	1.12491	13.5165	3.75665	up
mws0262	C4H6O6	L-Tartaric acid	Organic acids	Organic acids	87-69-4	B	75637	62244	66460	209430	196370	179250	1.11634	2.86311	1.51758	up
mws0230	C4H9NO3	L-Threonine	Amino acids and derivatives	Amino acids and derivatives	72-19-5	B	2603300	2674600	2433400	6238500	6584700	6217900	1.12394	2.46925	1.30407	up
mws0282	C11H12N2O2	L-Tryptophan	Amino acids and derivatives	Amino acids and derivatives	73-22-3	A	4576400	4349000	4123400	13878000	11587000	12901000	1.12014	2.94019	1.55591	up
mws0250	C9H11NO3	L-Tyrosine	Amino acids and derivatives	Amino acids and derivatives	60-18-4	A	2591700	2402400	2539800	37305000	34000000	36218000	1.12674	14.2719	3.8351	up
mws1641	C6H4N4O2	Lumazine	Nucleotides and derivatives	Nucleotides and derivatives	487-21-8	B	9682.4	7880.6	5994.9	26198	27583	25216	1.09813	3.35331	1.74559	up
Hmjn004446	C30H26O13	Luteolin-7-O-(6''-caffeoyl)rhamnoside*	Flavonoids	Flavonoid	-	A	2839700	2968100	2610400	1430800	1401600	1362500	1.11969	0.498313	-1.00488	down
mws0256	C5H11NO2	L-Valine*	Amino acids and derivatives	Amino acids and derivatives	72-18-4	A	1617700	1620500	1643700	15461000	14085000	13972000	1.12664	8.91415	3.1561	up
Lmhp001670	C11H22N2O3	L-Valyl-L-Leucine	Amino acids and derivatives	Amino acids and derivatives	3989-97-7	B	57946	53503	66718	1081400	1148600	1064800	1.12589	18.4928	4.20889	up
Lmhp002001	C14H20N2O3	L-Valyl-L-Phenylalanine	Amino acids and derivatives	Amino acids and derivatives	3918-92-1	B	32357	23574	33702	1073700	1103300	1011700	1.12474	35.5751	5.15279	up
pmd0153	C19H39O7P	LysoPA 16:0	Lipids	Glycerol ester	22002-85-3	B	9	9	9	48503	32017	32056	1.12653	4169.48	12.0257	up
pmd0130	C22H46NO7P	LysoPC 14:0(2n isomer)	Lipids	LPC	-	A	29017	25276	21285	1334100	1240200	1304200	1.12586	51.3178	5.68139	up
pmb2319	C23H48NO7P	LysoPC 15:0	Lipids	LPC	-	A	20330	14915	14155	862830	771490	713840	1.12469	47.5336	5.57088	up
Lmhp009129	C23H48NO7P	LysoPC 15:0(2n isomer)*	Lipids	LPC	-	B	20969	19910	15860	909940	804580	823620	1.12574	44.7336	5.48329	up
pmb2260	C23H46NO7P	LysoPC 15:1	Lipids	LPC	-	A	15056	11554	11973	1034200	963750	932390	1.12615	75.949	6.24696	up
pmb0855	C24H50NO7P	LysoPC 16:0	Lipids	LPC	17364-16-8	A	590590	509680	465610	17867000	17137000	17001000	1.12616	33.2114	5.0536	up
pmd0132	C24H50NO7P	LysoPC 16:0(2n isomer)*	Lipids	LPC	-	A	133470	120860	111900	1087900	1043100	1090000	1.12575	8.79502	3.13669	up
pmp001270	C24H48NO7P	LysoPC 16:1	Lipids	LPC	-	A	73737	68024	58627	1022500	914200	855850	1.12475	13.9357	3.80072	up
Lmhp008833	C24H48NO7P	LysoPC 16:1(2n isomer)*	Lipids	LPC	-	B	94353	110330	105640	424610	422690	383550	1.12334	3.96635	1.98781	up
pma1303	C24H46NO7P	LysoPC 16:2	Lipids	LPC	-	B	10420	7216	7480.3	658890	686880	689650	1.12544	81.0398	6.34056	up
pmb0863	C24H46NO7P	LysoPC 16:2(2n isomer)*	Lipids	LPC	-	A	8296.9	8593	7648.3	92751	97505	95463	1.12658	11.6438	3.5415	up
pmb2406	C25H52NO7P	LysoPC 17:0	Lipids	LPC	50930-23-9	A	28088	25504	22579	1338000	1260300	1266200	1.12646	50.7345	5.6649	up
Lmhp010515	C25H52NO7P	LysoPC 17:0(2n isomer)*	Lipids	LPC	-	B	2541.9	2473.9	2144.8	27607	33888	31247	1.12487	12.9517	3.69507	up
Lmhp009590	C25H50NO7P	LysoPC 17:1	Lipids	LPC	-	A	27352	23023	21086	958720	924100	939020	1.12609	39.4878	5.30334	up
Lmhp008718	C25H48NO7P	LysoPC 17:2	Lipids	LPC	-	A	10211	7984.4	7434	47090	44606	44248	1.11935	5.30422	2.40714	up
mws0126	C26H54NO7P	LysoPC 18:0	Lipids	LPC	19420-57-6	A	140270	114990	117730	5700900	5193100	5317000	1.12635	43.4623	5.44169	up
pmd0136	C26H54NO7P	LysoPC 18:0(2n isomer)	Lipids	LPC	-	A	167080	133340	137080	6549300	5847200	6034300	1.1261	42.1275	5.39669	up
pmp001281	C26H52NO7P	LysoPC 18:1	Lipids	LPC	-	A	683690	634380	595310	7078500	6725500	6993000	1.12638	10.8692	3.44218	up
Lmhp010190	C26H52NO7P	LysoPC 18:1(2n isomer)*	Lipids	LPC	-	A	4967300	4487800	4542300	12760000	12739000	12519000	1.12465	2.71608	1.44152	up
pmp001273	C26H50NO7P	LysoPC 18:2	Lipids	LPC	-	A	2799500	2385800	2454800	40821000	40798000	39889000	1.12635	15.904	3.99132	up
pmp001251	C26H50NO7P	LysoPC 18:2(isomer)*	Lipids	LPC	-	A	11134000	10636000	10602000	39066000	39528000	37969000	1.12654	3.60074	1.84829	up
pmb0854	C26H48NO7P	LysoPC 18:3	Lipids	LPC	-	A	1242700	1119500	1077300	22162000	21704000	22311000	1.12661	19.2403	4.26606	up
pmb0865	C26H48NO7P	LysoPC 18:3(2n isomer)*	Lipids	LPC	-	A	6488100	6122800	6222000	24318000	24907000	25370000	1.12656	3.96089	1.98582	up
Lmhp010908	C27H54NO7P	LysoPC 19:1	Lipids	LPC	-	A	4538.7	3189.4	3549.9	49458	45829	48389	1.12312	12.7395	3.67124	up
Lmhp007840	C27H52NO7P	LysoPC 19:2	Lipids	LPC	-	B	1251.8	795.89	751.02	204630	162130	182290	1.12463	196.18	7.61603	up
Lmhp007598	C27H52NO7P	LysoPC 19:2(2n isomer)*	Lipids	LPC	-	B	4317.2	3047.2	2437.9	239040	205130	229350	1.12337	68.7104	6.10246	up
Lmhp011549	C28H56NO7P	LysoPC 20:1	Lipids	LPC	-	A	20927	18807	17344	140300	126280	131640	1.12477	6.97677	2.80256	up
pmd0147	C28H54NO7P	LysoPC 20:2	Lipids	LPC	-	A	11469	10155	7505.8	262240	253990	269000	1.12374	26.9562	4.75255	up
pmd0146	C28H54NO7P	LysoPC 20:2(2n isomer)*	Lipids	LPC	-	B	6923.4	7398.9	6524.3	36653	41237	38618	1.1252	5.58883	2.48255	up
Lmhp009890	C28H52NO7P	LysoPC 20:3	Lipids	LPC	-	A	15591	12155	13600	346940	306590	297810	1.12541	23.0092	4.52414	up
pmb0864	C19H40NO7P	LysoPE 14:0	Lipids	LPE	-	B	5759.7	5161	6658.2	40206	38693	37984	1.1236	6.64905	2.73315	up
Lmhp008337	C19H40NO7P	LysoPE 14:0(2n isomer)*	Lipids	LPE	-	B	6695.1	6932.6	6518.1	43932	44478	44853	1.1269	6.61493	2.72573	up
Lmhp009187	C20H42NO7P	LysoPE 15:0	Lipids	LPE	-	B	4808	6071.1	6091.6	44768	45852	41934	1.1236	7.81076	2.96546	up
Lmhp008885	C20H42NO7P	LysoPE 15:0(2n isomer)	Lipids	LPE	-	B	5757.6	4083.7	5315	44226	42689	39870	1.12129	8.36517	3.06439	up
Lmhp008440	C20H40NO7P	LysoPE 15:1	Lipids	LPE	-	B	2072.4	1528	2064	18682	22793	23056	1.12145	11.3924	3.51	up
pmd0160	C21H44NO7P	LysoPE 16:0(2n isomer)	Lipids	LPE	-	A	1414100	1350700	1344100	9557700	9927200	9680600	1.12687	7.09813	2.82744	up
pmb0876	C21H44NO7P	LysoPE 16:0*	Lipids	LPE	53862-35-4	A	1427400	1390400	1343000	9479800	10024000	9667300	1.12674	7.01094	2.80961	up
Lmhp009034	C21H42NO7P	LysoPE 16:1*	Lipids	LPE	-	A	26476	21545	24706	54805	53426	50272	1.11136	2.17942	1.12395	up
Lmhp009769	C22H44NO7P	LysoPE 17:1*	Lipids	LPE	-	B	7682.7	6757.2	8861.1	53012	55378	54355	1.12342	6.98446	2.80415	up
pmb0883	C23H48NO7P	LysoPE 18:0	Lipids	LPE	69747-55-3	B	13657	11327	11050	116030	114650	117400	1.12509	9.65977	3.27199	up
mws0289	C23H46NO7P	LysoPE 18:1	Lipids	LPE	89576-29-4	A	135010	119710	117200	332370	317310	332200	1.12189	2.64003	1.40055	up
pmb0856	C23H46NO7P	LysoPE 18:1(2n isomer)*	Lipids	LPE	-	A	430340	364770	366050	1129000	1132000	1131300	1.12123	2.92148	1.5467	up
pmb0881	C23H44NO7P	LysoPE 18:2	Lipids	LPE	-	A	381850	363540	352580	1420500	1493800	1402500	1.12596	3.93162	1.97512	up
pmb0874	C23H44NO7P	LysoPE 18:2(2n isomer)*	Lipids	LPE	-	A	3543600	3305700	3203500	9381800	9855900	9084900	1.12397	2.81738	1.49436	up
Lmhp008801	C23H42NO7P	LysoPE 18:3	Lipids	LPE	-	A	202880	197550	152430	636700	599590	572650	1.11261	3.27197	1.71016	up
Lmhp008589	C23H42NO7P	LysoPE 18:3(2n isomer)*	Lipids	LPE	-	A	1198100	1193400	1107900	3275200	3307100	3342900	1.12567	2.83626	1.50399	up
Lmhp010757	C25H48NO7P	LysoPE 20:2	Lipids	LPE	-	A	1785	1870.7	2549.9	12598	11221	11859	1.11751	5.74932	2.52339	up
Lmhp010514	C25H48NO7P	LysoPE 20:2(2n isomer)*	Lipids	LPE	-	B	2297	1731.2	2094.9	12802	12818	11860	1.12188	6.12108	2.61379	up
Lmhp010040	C25H46NO7P	LysoPE 20:3	Lipids	LPE	-	A	2572.9	2402.4	1765	16608	15371	14784	1.11846	6.93782	2.79448	up
Lmhp009802	C25H46NO7P	LysoPE 20:3(2n isomer)*	Lipids	LPE	-	B	2589.1	2566.4	2116.5	17699	14075	13652	1.11976	6.2467	2.64309	up
Hmyn007168	C22H45O9P	LysoPG(16:0)	Lipids	Glycerol ester	-	A	29200	27912	25382	189540	204770	210990	1.12553	7.3375	2.87529	up
Zmhn005413	C15H12O9	m/p Dimeric galloyl methyl este*	Tannins	Tannin	-	A	4313100	4053000	3757700	1180800	1063900	1052200	1.12328	0.271936	-1.87866	down
mws1593	C24H42O21	Maltotetraose*	Others	Saccharides and Alcohols	34612-38-9	B	39734	36451	31722	7112.7	7431	6202.6	1.12129	0.192261	-2.37886	down
Smlp003276	C26H27O15+	Malvidin-3-O-malonylglucoside	Flavonoids	Anthocyanins	-	B	67471	63174	55910	23222	27897	20967	1.10349	0.386406	-1.37181	down
Lmfn001769	C28H26O17	Maplexin G	Tannins	Tannin	-	B	127550	138400	115960	9	9	9	1.12707	7.06973e-05	-13.788	down
Lmfp003026	C28H26O16	Maplexin H	Tannins	Tannin	-	B	480420	493720	517350	140650	75207	121460	1.09305	0.226161	-2.14458	down
pme1419	C6H13NO2S	Methionine methyl ester	Amino acids and derivatives	Amino acids and derivatives	10332-17-9	B	68221	77268	79583	15336	23320	12753	1.0949	0.228411	-2.13029	down
pmb0818	C11H11NO3	Methoxyindoleacetic acid	Alkaloids	Plumerane	3471-31-6	B	946550	950770	865970	2686900	2564100	2330600	1.12118	2.74369	1.45612	up
Hmsn000210	C17H30O2	Methyl 7,10-hexadecadienoate	Lipids	Free fatty acids	-	A	5717200	5754100	5622700	2734300	2746500	2654400	1.1265	0.47591	-1.07124	down
mws1212	C11H12O4	Methyl ferulate	Phenolic acids	Phenolic acids	2309-07-1	B	583990	633840	584090	17573	23571	22766	1.12529	0.0354677	-4.81735	down
mws1195	C10H10O3	Methyl p-coumarate*	Phenolic acids	Phenolic acids	3943-97-3	A	1021500	1138000	1013100	152360	151680	142880	1.12604	0.140869	-2.82758	down
pmn001669	C12H14O5	Methyl sinapate	Phenolic acids	Phenolic acids	20733-94-2	B	14378	16829	13833	1773.8	1652.9	1166.2	1.11852	0.101974	-3.29373	down
Hmtn001288	C9H10O4	Methyl-(2,4-dihydroxyphenyl)acetate	Phenolic acids	Phenolic acids	-	B	4180.4	4473.9	3874.7	18103	24775	21357	1.11864	5.12691	2.35809	up
pmn001640	C20H18O12	Myricetin-3-O-arabinoside	Flavonoids	Flavonols	132679-85-7	A	5786400	6327000	6543200	1289000	1198500	1345500	1.12479	0.20545	-2.28314	down
Lmpp003465	C21H20O13	Myricetin-3-O-glucoside	Flavonoids	Flavonols	19833-12-6	B	7417700	7282000	8138300	2757800	3112800	2950400	1.12121	0.386242	-1.37242	down
pme3033	C4H9NO2	N,N-Dimethylglycine*	Amino acids and derivatives	Amino acids and derivatives	1118-68-9	B	208210	195800	224990	850150	868420	862900	1.12527	4.10409	2.03706	up
pme0122	C8H16N2O3	N6-Acetyl-L-lysine	Amino acids and derivatives	Amino acids and derivatives	692-04-6	B	150640	168580	135770	354760	309980	278180	1.09125	2.0724	1.0513	up
pmb0197	C11H15N5O5	N7-Methylguanosine	Nucleotides and derivatives	Nucleotides and derivatives	20244-86-4	B	10877	9144.2	10961	26401	23741	25842	1.11467	2.4525	1.29426	up
pme0253	C8H15NO3	N-Acetyl-L-leucine	Amino acids and derivatives	Amino acids and derivatives	1188-21-2	B	16935	11192	13959	174770	185200	175430	1.12198	12.7216	3.6692	up
mws0520	C11H13NO4	N-Acetyl-L-tyrosine	Amino acids and derivatives	Amino acids and derivatives	537-55-3	B	16578	13610	20683	164220	177170	188320	1.12063	10.4128	3.38029	up
pme2651	C21H28N7O17P3	NADP (Nicotinamide adenine dinucleotide phosphate)	Nucleotides and derivatives	Nucleotides and derivatives	53-59-8	B	237330	230640	227470	66361	65899	54734	1.12187	0.268886	-1.89493	down
pme0376	C15H12O5	Naringenin	Flavonoids	Dihydroflavone	480-41-1	A	708560	770450	705960	67119	67043	67967	1.12678	0.0925088	-3.43427	down
pme2960	C15H12O5	Naringenin chalcone*	Flavonoids	Chalcones	73692-50-9	B	936120	929330	929530	93642	100220	97143	1.12698	0.104117	-3.26372	down
mws1179	C21H22O10	Naringenin-7-O-glucoside (Prunin)	Flavonoids	Dihydroflavone	529-55-5	A	852190	820410	789940	86214	99696	105780	1.12512	0.118451	-3.07764	down
mws0046	C27H32O14	Naringenin-7-O-Neohesperidoside(Naringin)	Flavonoids	Dihydroflavone	10236-47-2	B	112360	110270	130550	64541	54014	57553	1.10181	0.498635	-1.00394	down
HJN087	C21H22O10	Naringenin-O-glucoside	Flavonoids	Flavonoid	-	A	588970	561220	623840	237590	227430	253420	1.12179	0.404976	-1.30409	down
pmp001287	C8H9N	N-Benzylmethylene isomethylamine	Alkaloids	Alkaloids	-	A	2476600	2154500	2571800	51746000	52472000	53232000	1.12642	21.8593	4.45017	up
pme1816	C16H18O9	Neochlorogenic acid(5-O-Caffeoylquinic acid)	Phenolic acids	Phenolic acids	906-33-2	A	2356300	2467600	2330300	1034200	1117200	1110200	1.12382	0.4559	-1.13321	down
pmp001080	C28H32O15	Neodiosmin (Diosmetin-7-O-Neohesperidoside)*	Flavonoids	Flavonoid	38665-01-9	B	19559	20213	33723	83476	72856	84379	1.0799	3.2752	1.71158	up
pmb0496	C15H22N4O3	N-Feruloylagmatine	Alkaloids	Phenolamine	-	B	21591000	22225000	21115000	809610	1044600	840940	1.12575	0.0415079	-4.59047	down
mws0133	C6H6N2O	Nicotinamide	Others	Vitamin	98-92-0	A	1484600	1362500	1382100	2930200	3317300	3536800	1.11509	2.31351	1.21008	up
mws0146	C7H7NO2	Nicotinic Acid Methyl Ester(Methyl Nicotinate)	Alkaloids	Alkaloids	93-60-7	B	120440	134730	117180	52854	46459	59140	1.10698	0.425549	-1.2326	down
pme0490	C6H5NO2	Nicotinic acid*	Others	Vitamin	59-67-6	B	30315	52392	30203	191690	174450	198190	1.09921	4.99805	2.32137	up
mws0983	C20H39NO2	N-Oleoylethanolamine	Others	Others	111-58-0	A	15822	13080	14362	59644	76564	84054	1.11558	5.09112	2.34798	up
pmb1574	C18H28O2	Octadecadien-6-ynoic acid	Lipids	Glycerol ester	-	B	4804.4	4952.5	6073.4	201790	213560	214670	1.1262	39.7984	5.31464	up
Lmdn001925	C26H34O12	Olivil-4'-O-glucoside	Lignans and Coumarins	Lignans	76880-93-8	B	14749	18300	25236	39719	42988	37015	1.03352	2.05408	1.03849	up
pmb1754	C5H15NO4P+	O-Phosphocholine	Alkaloids	Alkaloids	107-73-3	B	820390	739840	733070	3736400	3864800	3601400	1.12551	4.88493	2.28834	up
mws4134	C20H32N6O12S2	Oxidized Glutathione	Amino acids and derivatives	Amino acids and derivatives	121-24-4	B	303580	324560	322130	698480	646770	645970	1.12269	2.09543	1.06724	up
mws0361	C16H30O2	Palmitoleic Acid	Lipids	Free fatty acids	373-49-9	A	4370.9	4964	5696.2	12609	12701	12514	1.1123	2.51638	1.33135	up
mws1589	C18H32O16	Panose*	Others	Saccharides and Alcohols	33401-87-5	B	866680	673000	793590	57852	49177	53058	1.12473	0.0686106	-3.86543	down
pme1261	C9H19NO4	Pantothenol	Others	Saccharides and Alcohols	16485-10-2	B	2260.6	9	9	403540	530090	605840	1.04387	675.621	9.40007	up
pme1439	C9H8O3	p-Coumaric acid	Phenolic acids	Phenolic acids	501-98-4	B	32090	46787	41531	234240	258170	225500	1.11758	5.96231	2.57587	up
pmb3055	C22H26O14	p-Coumaroyl quinic acid O-glucuronic acid	Phenolic acids	Phenolic acids	-	B	6212300	6275700	6039000	9857800	12277000	16899000	1.03338	2.10686	1.07509	up
pmb0508	C14H20N4O2	p-Coumaroylagmatine	Alkaloids	Phenolamine	7295-86-5	A	17468	21523	13653	9	9	9	1.12645	0.000512879	-10.9291	down
Lmhn003689	C23H20O11	p-Coumaroylferuloyltartaric acid	Phenolic acids	Phenolic acids	-	B	22032	24669	23203	9	9	9	1.12708	0.000386244	-11.3382	down
pme1793	C27H31O15+	Pelargonidin-3,5-diglucoside	Flavonoids	Anthocyanins	17334-58-6	B	667930	600890	679380	76944	112380	73460	1.11663	0.134886	-2.89019	down
Smsp001640	C27H31O16+	Petunidin-3-O-glucoside-O-arabinoside	Flavonoids	Anthocyanins	-	B	18424000	18094000	18238000	432720	533300	400140	1.12597	0.02495	-5.32482	down
mws0159	C9H8O3	Phenylpyruvic acid	Organic acids	Organic acids	156-06-9	B	37645	27494	34967	441250	539140	454380	1.12294	14.3325	3.84122	up
mws0636	C18H20N2O3	Phe-Phe	Amino acids and derivatives	Amino acids and derivatives	2577-40-4	B	2591.2	3085.8	4649.8	99684	103130	89224	1.12094	28.2796	4.82169	up
mws2125	C3H4KO6P	Phosphoenolpyruvic acid	Organic acids	Organic acids	4265-07-0	A	248320	277250	241190	21479	14572	15947	1.12228	0.0678152	-3.88225	down
pme0282	C8H6O4	Phthalic acid*	Organic acids	Organic acids	88-99-3	A	49611	36558	40969	301370	284000	266450	1.12137	6.69996	2.74415	up
Lmgp000796	C8H7NO2	p-Hydroxymandelonitrile	Alkaloids	Alkaloids	-	A	270400	315540	271130	1031500	876180	949210	1.11985	3.33332	1.73696	up
mws0914	C15H12O5	Pinobanksin*	Flavonoids	Dihydroflavonol	548-82-3	A	676040	739390	728700	69333	74865	71833	1.12658	0.100755	-3.31108	down
pmb0782	C5H11N	Piperidine	Alkaloids	Alkaloids	110-89-4	B	909240	842700	1217300	18987000	15793000	14508000	1.12187	16.5995	4.05307	up
mws0836	C30H26O12	Procyanidin B1	Tannins	Proanthocyanidins	20315-25-7	A	3296200	3912800	3259500	1658900	1697200	1754900	1.11075	0.488227	-1.03438	down
pme0436	C30H26O12	Procyanidin B3	Tannins	Proanthocyanidins	23567-23-9	A	104800	131140	140230	51640	71142	63089	1.05917	0.494114	-1.01708	down
pmn001667	C30H26O12	Procyanidin B4	Tannins	Proanthocyanidins	29106-51-2	A	2020300	2210600	1944100	313990	347490	250340	1.12063	0.147663	-2.75962	down
Lmpp003705	C52H42O22	Procyanidin C1 3'-O-gallate	Tannins	Proanthocyanidins	-	B	682070	739070	763890	193120	214570	141460	1.10826	0.251324	-1.99238	down
pmn001646	C45H38O18	Procyanidin C1*	Tannins	Proanthocyanidins	37064-30-5	A	1032700	1324000	1207400	328730	402660	410540	1.10952	0.320398	-1.64206	down
pmn001647	C45H38O18	Procyanidin C2	Tannins	Proanthocyanidins	37064-31-6	B	1142800	1152300	1173900	213570	316620	298960	1.11127	0.239017	-2.06481	down
pmp001282	C28H50NO7P	Propyl 2-(trimethylammonio)ethyl phosphate	Others	Others	-	B	72084	72890	72334	595300	597350	584680	1.1271	8.17885	3.0319	up
pmb0889	C18H30O2	Punicic acid	Lipids	Free fatty acids	544-72-9	A	540410	502180	459780	11180000	10968000	11427000	1.12656	22.348	4.48208	up
mws0025	C6H6O3	Pyrogallol	Phenolic acids	Phenolic acids	87-66-1	B	239380	256770	276650	64607	71729	33803	1.07795	0.220159	-2.18338	down
Lmmn004912	C16H12O7	Quercetin-3-O-methyl ether	Flavonoids	Flavonols	1486-70-0	B	21222	24331	23033	55675	57494	61929	1.12071	2.55297	1.35218	up
Lnrp102163	C33H40O20	Quercetin-3-O-rutinoside-7-O-rhamnoside	Flavonoids	Flavonols	-	B	431700	347280	417460	85794	132760	107240	1.10154	0.272303	-1.87672	down
mws4183	C20H18O11	Quercetin-3-O-α-L-arabinopyranoside(guaijaverin)	Flavonoids	Flavonols	22255-13-6	A	13296000	12404000	16125000	6395700	5683100	6150100	1.10333	0.435837	-1.19814	down
Lmmp002755	C33H40O21	Quercetin-7-O-rutinoside-4'-O-glucoside	Flavonoids	Flavonols	-	B	66745	41312	61198	206910	202490	194100	1.09818	3.56563	1.83416	up
Lmjp004941	C16H12O6	Rhamnocitrin (7-Methylkaempferol)	Flavonoids	Flavonoid	569-92-6	A	177160	172030	204690	1167800	1192700	1179600	1.12525	6.39146	2.67614	up
Lmdp003146	C10H14O2	Rhododendrol	Others	Others	501-96-2	B	201740	195150	222510	20416	33348	18922	1.11185	0.117349	-3.09112	down
mws0232	C17H20N4O6	Riboflavin	Others	Vitamin	83-88-5	A	258460	297620	266320	767830	774830	688980	1.11985	2.71357	1.44019	up
pme2746	C27H33N9O15P2	Riboflavin 5'-Adenosine Diphosphate	Nucleotides and derivatives	Nucleotides and derivatives	146-14-5	B	148660	136050	128290	58010	49626	52849	1.11747	0.388584	-1.3637	down
Lmgn001670	C7H6O3	Salicylic acid	Phenolic acids	Phenolic acids	69-72-7	B	30625	37409	52143	87429	96090	82431	1.04847	2.21299	1.14599	up
Zmhn001926	C13H16O8	Salicylic acid O-glycoside*	Phenolic acids	Phenolic acids	-	A	18121000	15470000	17262000	153590	158540	150400	1.12691	0.00909543	-6.78064	down
mws1077	C16H18O9	Scopoletin-7-O-glucoside (Scopolin)	Lignans and Coumarins	Coumarins	531-44-2	B	117180	115190	98311	39027	31090	49259	1.08553	0.361	-1.46993	down
pme2024	C10H12N2O	Serotonin	Alkaloids	Plumerane	50-67-9	B	292920	262270	296110	9	9	9	1.1271	3.17162e-05	-14.9444	down
pme3443	C11H12O4	Sinapinaldehyde	Phenolic acids	Phenolic acids	4206-58-0	B	40220	42170	53702	12102	12877	11112	1.11456	0.265196	-1.91487	down
Lmhn001580	C15H16O10	sinapoyltartaric acid	Phenolic acids	Phenolic acids	-	B	9	9	9	83410	71726	62882	1.12695	8074.74	12.9792	up
Hmln002597	C10H9NaO4	Sodium ferulate	Others	Others	-	B	90548	107870	97586	5177.1	6618.6	6780.8	1.12421	0.0627576	-3.99407	down
Lmlp002765	C15H16O2	Stilbostemin B	Phenolic acids	Phenolic acids	162411-67-8	B	3476.1	4484.6	4086.7	26039	33028	26882	1.12071	7.13424	2.83476	up
Lmqp000873	C4H4O3	Succinic anhydride	Organic acids	Organic acids	108-30-5	B	546410	420180	553350	173530	182900	189480	1.10872	0.359165	-1.47728	down
Zmln000899	C15H20O9	Syringic Aldehyde-glucoside	Phenolic acids	Phenolic acids	-	B	139070	123160	126430	44872	40234	38782	1.12157	0.318757	-1.64947	down
mws0011	C17H24O9	Syringin	Phenolic acids	Phenolic acids	118-34-3	B	21713	17035	14759	6958.8	6194	7982.6	1.08219	0.395003	-1.34007	down
pme0281	C8H6O4	Terephthalic acid	Phenolic acids	Phenolic acids	100-21-0	A	362110	422320	409040	3435200	2650800	2446200	1.11986	7.14907	2.83776	up
pmn001378	C26H32O11	Terpineol mono-glucoside	Lignans and Coumarins	Lignans	-	A	3622400	3665900	3287400	1043600	1209200	1028600	1.12099	0.310277	-1.68837	down
Lmcn004772	C20H16O9	Theaflagallin	Tannins	Tannin	102208-15-1	B	59770	52637	46039	5194800	6882700	6074100	1.12582	114.56	6.83996	up
Lmcn004686	C43H32O19	Theaflavate B;3'-O-(3,4,5-Trihydroxybenzoyl)	Tannins	Tannin	152542-70-6	B	3028700	3469600	3796400	698140	708230	724720	1.12299	0.207008	-2.27224	down
Lmcn003163	C28H20O14	Theaflavic acid;3-Epimer,3-O-(3,4,5-trihydroxybenzoyl)	Tannins	Tannin	34218-97-8	B	4645900	4543500	4834800	1756500	1624900	1660300	1.12521	0.3595	-1.47594	down
mws1293	C29H24O12	Theaflavin	Tannins	Proanthocyanidins	4670-5-7	A	310230	250540	287740	8811600	10162000	8786200	1.12591	32.7159	5.03192	up
mws1296	C43H32O20	Theaflavin 3,3'-Digallate	Tannins	Proanthocyanidins	30462-35-2	A	129060	57002	118880	12110000	12061000	12274000	1.12062	119.515	6.90104	up
mws1294	C36H28O16	Theaflavin-3-gallate*	Tannins	Proanthocyanidins	30462-34-1	A	152320	64170	137830	5223900	5761000	5508500	1.11605	46.5494	5.54069	up
mws1295	C36H28O16	Theaflavin-3'-Gallate8	Tannins	Proanthocyanidins	28543-07-9	B	88206	35721	74840	2980900	2800000	2824000	1.11532	43.2914	5.43601	up
mws0352	C7H8N4O2	Theophylline	Alkaloids	Alkaloids	58-55-9	A	72216	63564	56842	32907	32648	27267	1.09283	0.481887	-1.05323	down
mws0889	C4H8O5	Threonate	Others	Saccharides and Alcohols	70753-61-6	A	2045700	1975400	1648100	699580	730280	698640	1.11633	0.37545	-1.41331	down
mws0920	C15H10O7	Tricetin	Flavonoids	Flavonoid	520-31-0	A	2783500	2635400	2404700	618420	614780	572440	1.12466	0.230794	-2.11532	down
Lmzp004885	C17H14O7	Tricin*	Flavonoids	Flavonoid	520-32-1	A	393590	375730	410140	2121300	2278000	2140200	1.12622	5.54449	2.47105	up
mws5040	C12H21O11Na	Turanose	Others	Saccharides and Alcohols	547-25-1	B	3097700	2938200	3005400	333920	318930	321840	1.12694	0.107804	-3.21351	down
mws2368	C8H10O2	Tyrosol	Phenolic acids	Phenolic acids	501-94-0	B	7757.1	7495.4	9267.7	22741	30214	26514	1.10936	3.24096	1.69642	up
pmb2922	C15H24N2O17P2	Uridine 5'-diphospho-D-glucose	Nucleotides and derivatives	Nucleotides and derivatives	133-89-1	A	3115000	3410900	3075200	467970	425380	400780	1.12537	0.13479	-2.89122	down
pme3188	C9H13N2O9P	Uridine 5'-monophosphate	Nucleotides and derivatives	Nucleotides and derivatives	58-97-9	A	47767	24183	21977	1468800	1957000	1848000	1.11792	56.1479	5.81116	up
mws0248	C9H12N2O6	Uridine*	Nucleotides and derivatives	Nucleotides and derivatives	58-96-8	A	28375	26372	46721	716230	506940	631420	1.11629	18.2776	4.192	up
mws0028	C8H8O4	Vanillic acid	Phenolic acids	Phenolic acids	121-34-6	B	12462	13238	14693	63726	67710	63118	1.12463	4.81653	2.26799	up
pme0256	C5H4N4O2	Xanthine	Nucleotides and derivatives	Nucleotides and derivatives	69-89-6	A	16272	20401	28870	72623	69958	86209	1.0856	3.49069	1.80351	up
mws0668	C10H12N4O6	Xanthosine	Nucleotides and derivatives	Nucleotides and derivatives	146-80-5	A	10890000	9595200	10612000	4282600	4365600	4246900	1.12271	0.414671	-1.26996	down
Lmbn002648	C9H8O3	α-Hydroxycinnamic Acid	Phenolic acids	Phenolic acids	5801-57-0	B	78452	69090	83526	1375400	1597600	1547900	1.12578	19.5652	4.29022	up
pme2380	C5H6O5	α-Ketoglutaric acid	Organic acids	Organic acids	328-50-7	A	802560	790280	727550	247030	241890	230920	1.12501	0.310224	-1.68862	down
mws0367	C18H30O2	α-Linolenic Acid*	Lipids	Free fatty acids	463-40-1	A	5102200	5120100	5046300	16568000	17869000	16154000	1.1256	3.3134	1.72831	up
mws0675	C11H15N2O8P	β-Nicotinamide mononucleotide	Nucleotides and derivatives	Nucleotides and derivatives	1094-61-7	B	20783	26120	33979	133550	176650	133000	1.10555	5.47959	2.45407	up
pme3011	C4H9NO2	γ-Aminobutyric acid*	Organic acids	Organic acids	1956-12-2	B	63565	66838	65005	912210	1008000	934910	1.12677	14.6111	3.86899	up
mws0366	C18H30O2	γ-Linolenic Acid	Lipids	Free fatty acids	506-26-3	B	5031600	4865600	4954600	15886000	16621000	15452000	1.12618	3.22917	1.69116	up
pmb0128	C13H24O2	δ-Tridecalactone	Lipids	Glycerol ester	7370-92-5	B	9	9	9	9920.7	11751	8914.6	1.12681	1132.83	10.1457	up
