# Supplementary material for: A Comparative Metabolomic Analysis Reveals Difference Manufacture Suitability in “Yinghong 9” and “Huangyu” Teas (Camellia sinensis)
Source: Front Plant Sci. 2021 Dec 14;12:767724. doi: 10.3389/fpls.2021.767724 (PMC8712721; doi:10.3389/fpls.2021.767724)
Supplement: Supplementary Table 4 — Representative flavonol glycosides between “Huangyu” fresh leaves and fermented leaves. [file Table_4.XLSX]

## Sheet: Sheet1
Index	Q1 (Da)	Q3 (Da)	Molecular Weight (Da)	Formula	Ionization model	Compounds	Class I	Class II	CAS	Level	YJYI	YJY2	YJY3	YJF1	YJF2	YJF3	HYY1	HYY2	HYY3	HYF1	HYF2	HYF3	cpd_ID	kegg_map
Lmdp003509	435.09	303.06	434.084	C20H18O11	[M+H]+	Quercetin-3-O-xyloside	Flavonoids	Flavonols	549-32-6	A	35522000	36930000	35303000	38719000	36245000	36885000	35926000	35033000	39859000	38908000	35472000	36019000	--	--
mws4183	433.08	300.03	434.085	C20H18O11	[M-H]-	Quercetin-3-O-α-L-arabinopyranoside	Flavonoids	Flavonols	22255-13-6	A	13928000	13446000	13045000	7355100	6233100	7658500	13296000	12404000	16125000	6395700	5683100	6150100	--	--
mws2209	449.11	287.06	448.101	C21H20O11	[M+H]+	Kaempferol-3-O-glucoside	Flavonoids	Flavonols	480-10-4	A	11484000	9929900	11893000	4163800	4088600	6540400	7431100	6332800	7470700	5307000	5434000	5401400	--	--
Lmpp003465	481.1	319.04	480.09	C21H20O13	[M-H]-	Myricetin-3-O-glucoside	Flavonoids	Flavonols	19833-12-6	B	8893400	7982300	8351700	1503900	2048100	1469900	7417700	7282000	8138300	2757800	3112800	2950400	--	--
Lmjp002867	595.17	287.05	594.158	C27H30O15	[M+H]+	Kaempferol-3-O-neohesperidoside	Flavonoids	Flavonols	32602-81-6	A	7055200	6607000	6229300	5437900	5230400	5198200	5418000	4889800	5115200	4598700	4790900	4824700	--	--
mws0045	449.11	303.05	448.101	C21H20O11	[M+H]+	Quercetin-3-O-rhamnoside	Flavonoids	Flavonols	522-12-3	B	4006900	5882900	4422200	6646100	3644800	3997600	5260700	5716400	3702700	5985400	5822500	4100600	C01750	ko00944
pmn001640	449.07	316	450.08	C20H18O12	[M-H]-	Myricetin-3-O-arabinoside	Flavonoids	Flavonols	132679-85-7	A	6230500	5155300	6878300	732080	787630	646160	5786400	6327000	6543200	1289000	1198500	1345500	--	--
Lmjp002461	611.16	303.05	610.153	C27H30O16	[M+H]+	Quercetin-3-O-neohesperidoside	Flavonoids	Flavonols	117611-67-3	A	4377800	4920400	5113300	5068900	5053400	5092900	4124500	4672100	4893300	5705700	4334500	4845800	--	--
mws0913	447.09	285	448.101	C21H20O11	[M-H]-	Kaempferol-3-O-galactoside	Flavonoids	Flavonols	23627-87-4	A	2240300	2567600	2130300	937850	814930	826300	1591300	1394400	2090800	847510	715960	703790	C12626	ko00944
Lmmp003903	491.12	287.05	490.111	C23H22O12	[M+H]+	Kaempferol-3-O-(2''-acetyl)glucoside	Flavonoids	Flavonols	-	A	1037400	1705400	974270	647900	662570	670790	700350	711670	803090	739730	738330	676480	--	--
mws0091	463.09	300.03	464.095	C21H20O12	[M-H]-	Quercetin-3-O-glucoside	Flavonoids	Flavonols	482-35-9	A	1521700	1659000	1602800	2471600	2186600	2235000	1213400	1626400	1639900	1695100	1605800	1627500	C05623	ko00944,ko01100,ko01110
Lmmn003398	489.11	285.04	490.111	C23H22O12	[M-H]-	Kaempferol-3-O-(6''-acetyl)glucoside	Flavonoids	Flavonols	-	A	1828500	1633500	1524100	1219100	1279700	1279100	1212200	1275500	1317000	1319000	1237400	1291000	C12249	ko00944,ko01110
mws0061	463.09	300	464.095	C21H20O12	[M-H]-	Quercetin-3-O-galactoside	Flavonoids	Flavonols	482-36-0	A	1399200	1588700	2002600	2523700	2065200	2394900	1539200	1311300	1343100	1701400	1604900	1636500	C10073	--
mws0919	431.1	285	432.106	C21H20O10	[M-H]-	Kaempferol-3-O-rhamnoside	Flavonoids	Flavonols	482-39-3	B	1132600	1036700	1105100	693330	695110	721830	762650	676530	744040	542700	503220	541130	C16911	ko00944
mws0059	609.15	301	610.153	C27H30O16	[M-H]-	Quercetin-3-O-rutinoside	Flavonoids	Flavonols	153-18-4	A	924210	905720	761090	659100	671020	674290	808680	740470	890420	557000	524770	431170	C05625	ko00944,ko01100,ko01110
pmn001583	609.15	300	610.153	C27H30O16	[M-H]-	Quercetin-3-O-robinobioside	Flavonoids	Flavonols	52525-35-6	A	813150	668000	661100	557340	537650	498900	604440	717610	719750	484840	517190	545440	--	--
pme1605	593.15	285	594.158	C27H30O15	[M-H]-	Kaempferol-3-O-robinobioside	Flavonoids	Flavonols	17297-56-2	B	677120	608000	672860	445820	540730	519700	301490	383630	444570	438950	352550	368090	--	--
Lnrp102163	757.21	303.05	756.211	C33H40O20	[M+H]+	Quercetin-3-O-rutinoside-7-O-rhamnoside	Flavonoids	Flavonols	-	B	355790	439680	382800	132720	86316	123470	431700	347280	417460	85794	132760	107240	--	--
pmp001105	757.22	287.06	756.211	C33H40O20	[M+H]+	Kaempferol-3-O-neohesperidoside-7-O-glucoside	Flavonoids	Flavonols	-	B	32331	51651	34492	11919	11069	16141	22465	37347	28942	14749	11141	7534.5	--	--
Lmmp002334	773.21	465.1	772.206	C33H40O21	[M+H]+	Quercetin-glucoside-glucoside-rhamnoside	Flavonoids	Flavonols	-	B	38491	41997	37116	61895	62962	49816	35040	38678	38395	44401	38669	62201	--	--
