# Supplementary material for: A Comparative Metabolomic Analysis Reveals Difference Manufacture Suitability in “Yinghong 9” and “Huangyu” Teas (Camellia sinensis)
Source: Front Plant Sci. 2021 Dec 14;12:767724. doi: 10.3389/fpls.2021.767724 (PMC8712721; doi:10.3389/fpls.2021.767724)
Supplement: Supplementary Table 5A — Differential flavonol glycosides between “Yinghong 9” fresh leaves and fermented leaves. [file Table_5.XLSX]

## Sheet: Sheet1
Index	Formula	Compounds	Class I	Class II	CAS	Level	YJYI	YJY2	YJY3	YJF1	YJF2	YJF3	VIP	Fold_Change	Log2FC	Type
pmn001640	C20H18O12	Myricetin-3-O-arabinoside	Flavonoids	Flavonols	132679-85-7	A	6230500	5155300	6878300	732080	787630	646160	1.13605	0.118586	-3.07599	down
Lmtp004126	C24H22O16	Myricetin-3-O-(6"-malony)glucoside	Flavonoids	Flavonols	-	B	98151	115600	140160	22180	17028	14860	1.12603	0.152773	-2.71054	down
Lmpp003465	C21H20O13	Myricetin-3-O-glucoside	Flavonoids	Flavonols	19833-12-6	B	8893400	7982300	8351700	1503900	2048100	1469900	1.13068	0.199065	-2.32869	down
Hmmp002121	C23H16O11	Isorhamnetin-3-O-gallate	Flavonoids	Flavonols	-	A	306880	227580	327090	55472	96721	91871	1.08503	0.283285	-1.81968	down
Lnrp102163	C33H40O20	Quercetin-3-O-rutinoside-7-O-rhamnoside	Flavonoids	Flavonols	-	B	355790	439680	382800	132720	86316	123470	1.11072	0.290685	-1.78247	down
pme2493	C27H30O14	Kaempferol-3,7-O-dirhamnoside(Kaempferitrin)	Flavonoids	Flavonols	482-38-2	A	1458100	1350300	1342700	364040	505590	344000	1.11959	0.292363	-1.77417	down
pmp001105	C33H40O20	Kaempferol-3-O-neohesperidoside-7-O-glucoside	Flavonoids	Flavonols	-	B	32331	51651	34492	11919	11069	16141	1.08092	0.330275	-1.59826	down
mws0032	C15H10O8	Myricetin	Flavonoids	Flavonols	529-44-2	B	107880	168130	119380	36782	56718	42249	1.0788	0.343329	-1.54233	down
mws0913	C21H20O11	Kaempferol-3-O-galactoside (Trifolin)	Flavonoids	Flavonols	23627-87-4	A	2240300	2567600	2130300	937850	814930	826300	1.12915	0.371722	-1.4277	down
Lmwp005248	C42H46O22	Kaempferol-3-O-(6'''-p-Coumaroylglucosyl)-(1->2)-Glucoside-7-Rhamnoside	Flavonoids	Flavonols	-	B	38278	61130	44647	20175	15022	21458	1.06665	0.393287	-1.34634	down
Lmmn004625	C21H22O11	Dihydrokaempferol-7-O-glucoside*	Flavonoids	Flavonols	-	B	197030	210670	285430	93215	96723	103830	1.10017	0.423828	-1.23845	down
mws2209	C21H20O11	Kaempferol-3-O-glucoside	Flavonoids	Flavonols	480-10-4	A	11484000	9929900	11893000	4163800	4088600	6540400	1.06279	0.444136	-1.17093	down
Lmyp005280	C37H38O18	Isorhamnetin-3-O-[6''-p-coumarylglucosyl-(1->2)-O-rhamnoside]	Flavonoids	Flavonols	-	B	18287	22245	19194	45229	40592	43012	1.12446	2.15707	1.10907	up
Lmmn004912	C16H12O7	Quercetin-3-O-methyl ether	Flavonoids	Flavonols	1486-70-0	B	20667	20184	20120	57451	56037	55006	1.1408	2.76351	1.4665	up
pmp001310	C27H30O17	6-Hydroxykaempferol-3,6-O-Diglucoside*	Flavonoids	Flavonols	-	B	164540	175700	214540	576200	405260	658610	1.08998	2.95625	1.56377	up
