# Supplementary material for: A Comparative Metabolomic Analysis Reveals Difference Manufacture Suitability in “Yinghong 9” and “Huangyu” Teas (Camellia sinensis)
Source: Front Plant Sci. 2021 Dec 14;12:767724. doi: 10.3389/fpls.2021.767724 (PMC8712721; doi:10.3389/fpls.2021.767724)
Supplement: Supplementary Table 5B — Representative flavonol glycosides between “Huangyu” fresh leaves and fermented leaves. [file Table_6.XLSX]

## Sheet: Sheet1
Index	Formula	Compounds	Class I	Class II	CAS	Level	HYY1	HYY2	HYY3	HYF1	HYF2	HYF3	VIP	Fold_Change	Log2FC	Type
pme2493	C27H30O14	Kaempferol-3,7-O-dirhamnoside	Flavonoids	Flavonols	482-38-2	A	1162600	1495100	1726200	341920	299600	330240	1.11212	0.221666	-2.17354	down
Hmmp002121	C23H16O11	Isorhamnetin-3-O-gallate	Flavonoids	Flavonols	-	A	400720	484550	311010	91338	88813	119720	1.09787	0.25067	-1.99614	down
Lnrp102163	C33H40O20	Quercetin-3-O-rutinoside-7-O-rhamnoside	Flavonoids	Flavonols	-	B	431700	347280	417460	85794	132760	107240	1.10154	0.272303	-1.87672	down
Lmmn004625	C21H22O11	Dihydrokaempferol-7-O-glucoside*	Flavonoids	Flavonols	-	B	231830	254240	282440	70030	78565	66742	1.11938	0.280201	-1.83547	down
Lmtp004126	C24H22O16	Myricetin-3-O-(6"-malony)glucoside	Flavonoids	Flavonols	-	B	140630	167480	118280	42098	44443	36508	1.10779	0.288583	-1.79294	down
pmp001105	C33H40O20	Kaempferol-3-O-neohesperidoside-7-O-glucoside	Flavonoids	Flavonols	-	B	22465	37347	28942	14749	11141	7534.5	1.0112	0.376597	-1.40891	down
Lmpp003465	C21H20O13	Myricetin-3-O-glucoside	Flavonoids	Flavonols	19833-12-6	B	7417700	7282000	8138300	2757800	3112800	2950400	1.12121	0.386242	-1.37242	down
mws4183	C20H18O11	Quercetin-3-O-α-L-arabinopyranoside	Flavonoids	Flavonols	22255-13-6	A	13296000	12404000	16125000	6395700	5683100	6150100	1.10333	0.435837	-1.19814	down
mws0913	C21H20O11	Kaempferol-3-O-galactoside	Flavonoids	Flavonols	23627-87-4	A	1591300	1394400	2090800	847510	715960	703790	1.06855	0.446619	-1.16288	down
mws1290	C30H26O13	Kaempferol-3-O-(6''-p-coumaroyl)glucoside	Flavonoids	Flavonols	20316-62-5	A	7031100	8624200	8292300	3413500	3920000	4032600	1.10115	0.474624	-1.07514	down
Lmmn004912	C16H12O7	Quercetin-3-O-methyl ether	Flavonoids	Flavonols	1486-70-0	B	21222	24331	23033	55675	57494	61929	1.12071	2.55297	1.35218	up
mws1068	C15H10O6	Kaempferol	Flavonoids	Flavonols	520-18-3	A	46272	51302	48384	125760	126050	123290	1.12482	2.56992	1.36172	up
mws0066	C16H12O7	Isorhamnetin	Flavonoids	Flavonols	480-19-3	B	5565	3795.3	6664.6	14611	17772	15971	1.07611	3.01743	1.59332	up
Lmpn007255	C16H12O8	6-Methoxyquercetin	Flavonoids	Flavonols	519-96-0	B	7983.3	7224.3	8947.4	27944	28281	25301	1.11951	3.37512	1.75494	up
Lmmp002755	C33H40O21	Quercetin-7-O-rutinoside-4'-O-glucoside	Flavonoids	Flavonols	-	B	66745	41312	61198	206910	202490	194100	1.09818	3.56563	1.83416	up
