# Supplementary material for: A Comparative Metabolomic Analysis Reveals Difference Manufacture Suitability in “Yinghong 9” and “Huangyu” Teas (Camellia sinensis)
Source: Front Plant Sci. 2021 Dec 14;12:767724. doi: 10.3389/fpls.2021.767724 (PMC8712721; doi:10.3389/fpls.2021.767724)
Supplement: Supplementary Table 6 — The quantification results of all detected carotenoids. [file Table_7.XLSX]

## Sheet: 科学计数法
Sample_ID	Group	α-Carotene	α-Cryptoxanthin	β-Carotene	Apocarote--l	β-Cryptoxanthin	(E/Z)-Phytoene	Lutein	lutein dimyristate	lutein myristate	Neoxanthin	echinenone	Zeaxanthin	Violaxanthin	violaxanthin dibutyrate	violaxanthin dilaurate	violaxanthin palmitate	lutein palmitate	β-citraurin	lutein caprate	zeaxanthin dimyristate	zeaxanthin palmitate	Antheraxanthin	Capsanthin
YJY1	YJY	1.25E+01	9.5E-01	3.6E+02	2.79E-02	2.29E+01	1.1E+01	4.09E+02	8.88E-01	1.02E+00	8.66E+00	2.4E-02	9.5E+01	9.22E-01	8.76E-03	6.78E-02	9.61E-02	1.35E+00	1E-02	8.53E-01	7.03E-02	1.22E+00	N/A	2.46E-02
YJY2	YJY	1.16E+01	8.7E-01	3.44E+02	2.01E-02	1.31E+01	1.02E+01	3.82E+02	8.66E-01	9.52E-01	7.48E+00	1.2E-02	9.71E+01	7.86E-01	1.05E-02	5.95E-02	6.02E-02	1.36E+00	8.16E-03	N/A	4.53E-02	1.33E+00	N/A	3.35E-02
YJY3	YJY	1.21E+01	7.43E-01	3.58E+02	1.83E-02	1.57E+01	1.04E+01	4.12E+02	8.68E-01	9.9E-01	8.48E+00	1.7E-02	9.71E+01	7.47E-01	1.04E-02	3.25E-02	7.1E-02	1.39E+00	7.7E-03	8.52E-01	N/A	1.01E+00	5.31E-01	3.62E-02
YJF1	YJF	1.16E+01	3.05E-01	3.21E+02	2.32E-02	1.14E+01	9.27E+00	3.86E+02	9.33E-01	1.09E+00	1.72E+01	1.73E-02	1.22E+01	1.68E+00	1.14E-02	5.12E-02	7.6E-02	9.98E-01	8.66E-03	8.94E-01	4.02E-02	3.48E-01	1.09E+00	N/A
YJF2	YJF	9.75E+00	2.75E-01	2.71E+02	2.03E-02	9.59E+00	8.28E+00	3.29E+02	8.95E-01	1E+00	1.35E+01	1.08E-02	9.83E+00	1.51E+00	9.65E-03	4.61E-02	7.34E-02	9.59E-01	7.69E-03	8.59E-01	2.17E-02	3.51E-01	8.64E-01	N/A
YJF3	YJF	1.2E+01	2.64E-01	3.04E+02	2.07E-02	1.09E+01	8.62E+00	3.77E+02	9.01E-01	1.1E+00	1.68E+01	1.57E-02	1.13E+01	1.99E+00	8.52E-03	5.31E-02	7.81E-02	9.74E-01	1.12E-02	N/A	7.69E-02	4.95E-01	1.04E+00	N/A
HYY1	HYY	4.04E+00	2.47E-01	1.26E+02	1.06E-02	8.85E+00	1.02E+01	1.71E+02	9.57E-01	1.13E+00	9.05E-01	1.03E-02	1.75E+02	1.51E-01	5.61E-03	6.6E-02	8.99E-02	1.8E+00	1.15E-02	N/A	N/A	2.31E+00	N/A	4.52E-02
HYY2	HYY	4.1E+00	3.17E-01	1.28E+02	1.22E-02	1.09E+01	9.35E+00	1.63E+02	9.48E-01	1.1E+00	9.67E-01	1.13E-02	1.71E+02	2.21E-01	6.38E-03	6.79E-02	6.67E-02	1.56E+00	8.77E-03	N/A	7.29E-02	2.52E+00	N/A	5.04E-02
HYY3	HYY	3.45E+00	3.31E-01	1.18E+02	9.04E-03	1.06E+01	1.06E+01	1.67E+02	9.14E-01	1.06E+00	7.88E-01	9.37E-03	1.93E+02	1.78E-01	9.55E-03	5.27E-02	5.12E-02	1.54E+00	1.07E-02	N/A	4.92E-02	2.78E+00	1.2E-01	5.2E-02
HYF1	HYF	2.71E+00	1.21E-01	9.64E+01	9.26E-03	4.72E+00	6.53E+00	1.15E+02	9.36E-01	1.14E+00	7.29E-01	7.01E-03	1.05E+01	3.01E-01	9.84E-03	4.64E-02	7.55E-02	9.72E-01	6.71E-03	8.94E-01	1.05E-01	4.94E-01	6.16E-02	3.67E-03
HYF2	HYF	2.8E+00	9.12E-02	9.52E+01	9.79E-03	5.1E+00	5.86E+00	1.15E+02	9.67E-01	1.12E+00	8.18E-01	6.15E-03	9.81E+00	3.26E-01	9.81E-03	5.19E-02	8.24E-02	N/A	N/A	9.23E-01	4.39E-02	N/A	7.36E-02	4.02E-03
HYF3	HYF	2.79E+00	6.82E-02	1.01E+02	7.85E-03	4.77E+00	6.11E+00	1.16E+02	1.01E+00	1.16E+00	7.79E-01	4.92E-03	1.19E+01	4.1E-01	8.14E-03	7.27E-02	9E-02	1E+00	5.49E-03	9.08E-01	N/A	N/A	9.41E-02	5.29E-03

## Sheet: 行列转换后的
Sample_ID	YJY1	YJY2	YJY3	YJF1	YJF2	YJF3	HYY1	HYY2	HYY3	HYF1	HYF2	HYF3
lutein caprate	0.853	0	0.852	0.894	0.859	0	0	0	0	0.894	0.923	0.908
zeaxanthin dimyristate	0.0703	0.0453	0	0.0402	0.0217	0.0769	0	0.0729	0.0492	0.105	0.0439	0
Antheraxanthin	0	0	0.531	1.09	0.864	1.04	0	0	0.12	0.0616	0.0736	0.0941
violaxanthin dibutyrate	0.00876	0.0105	0.0104	0.0114	0.00965	0.00852	0.00561	0.00638	0.00955	0.00984	0.00981	0.00814
echinenone	0.024	0.012	0.017	0.0173	0.0108	0.0157	0.0103	0.0113	0.00937	0.00701	0.00615	0.00492
Apocarote-l	0.0279	0.0201	0.0183	0.0232	0.0203	0.0207	0.0106	0.0122	0.00904	0.00926	0.00979	0.00785
β-citraurin	0.01	0.00816	0.0077	0.00866	0.00769	0.0112	0.0115	0.00877	0.0107	0.00671	0	0.00549
Capsanthin	0.0246	0.0335	0.0362	0	0	0	0.0452	0.0504	0.052	0.00367	0.00402	0.00529
violaxanthin dilaurate	0.0678	0.0595	0.0325	0.0512	0.0461	0.0531	0.066	0.0679	0.0527	0.0464	0.0519	0.0727
violaxanthin palmitate	0.0961	0.0602	0.071	0.076	0.0734	0.0781	0.0899	0.0667	0.0512	0.0755	0.0824	0.09
Violaxanthin	0.922	0.786	0.747	1.68	1.51	1.99	0.151	0.221	0.178	0.301	0.326	0.41
α-Cryptoxanthin	0.95	0.87	0.743	0.305	0.275	0.264	0.247	0.317	0.331	0.121	0.0912	0.0682
Neoxanthin	8.66	7.48	8.48	17.2	13.5	16.8	0.905	0.967	0.788	0.729	0.818	0.779
lutein dimyristate	0.888	0.866	0.868	0.933	0.895	0.901	0.957	0.948	0.914	0.936	0.967	1.01
lutein myristate	1.02	0.952	0.99	1.09	1	1.1	1.13	1.1	1.06	1.14	1.12	1.16
lutein palmitate	1.35	1.36	1.39	0.998	0.959	0.974	1.8	1.56	1.54	0.972	0	1
zeaxanthin palmitate	1.22	1.33	1.01	0.348	0.351	0.495	2.31	2.52	2.78	0.494	0	0
α-Carotene	12.5	11.6	12.1	11.6	9.75	12	4.04	4.1	3.45	2.71	2.8	2.79
β-Cryptoxanthin	22.9	13.1	15.7	11.4	9.59	10.9	8.85	10.9	10.6	4.72	5.1	4.77
(E/Z)-Phytoene	11	10.2	10.4	9.27	8.28	8.62	10.2	9.35	10.6	6.53	5.86	6.11
β-Carotene	360	344	358	321	271	304	126	128	118	96.4	95.2	101
Lutein	409	382	412	386	329	377	171	163	167	115	115	116
Zeaxanthin	95	97.1	97.1	12.2	9.83	11.3	175	171	193	10.5	9.81	11.9
