# Supplementary material for: A Comparative Metabolomic Analysis Reveals Difference Manufacture Suitability in “Yinghong 9” and “Huangyu” Teas (Camellia sinensis)
Source: Front Plant Sci. 2021 Dec 14;12:767724. doi: 10.3389/fpls.2021.767724 (PMC8712721; doi:10.3389/fpls.2021.767724)
Supplement: Supplementary Table 7 — The results of volatile compounds in all samples. [file Table_8.XLSX]

## Sheet: Sheet1
compounds	YJY	YJF	HYY	HYF	RT
Hexanal	4.54273	1.3626	2.33867	0.5873	4.625
2-Hexenal, (E)-	10.5948	2.4599	7.16017	1.6399	5.8791
4-Pentenal	0	0.938	0	0.568367	6.1828
2-Heptanol	0.2204	0.4459	0.555	0.797533	6.9286
2-Octanol, (R)-	0	0	0	0.370767	7.1777
Benzaldehyde	0	1.50037	0	2.90993	8.6353
1-Octen-3-ol	0.494267	0	0.585867	0	9.1559
β-Myrcene	1.61347	1.4245	1.7439	1.6893	9.4869
3-Hexen-1-ol, acetate, (Z)-	5.5665	0	0	0	10.5607
D-Limonene	0.683267	0.537967	0.6586	0.5635	10.5908
trans-β-Ocimene	0.308633	0.1573	0.328867	0.222633	10.8417
Benzeneacetaldehyde	0	6.35447	0	8.9418	10.9984
β-Ocimene	0.656333	0	0.790233	0	11.1576
trans-Linalool oxide	0.4127	1.04613	0.4238	1.30203	11.8492
cis-Linaloloxide	1.1428	2.7309	1.1419	2.71157	12.2246
Linalool	65.7434	54.9899	72.769	56.4279	12.7494
(E)-4,8-Dimethylnona-1,3,7-triene	0.1554	0.551	0.442433	0.288233	13.1792
cis-Allo-ocimene	0.164	0	0.2077	0.190933	13.5387
1,4-Pentadiene	0	0.1992	0	0.2247	14.6805
Linalool Oxide	0	0.943567	0	0.963567	14.8004
Terpinen-4-ol	0	0	0	0.300667	14.9122
α-Terpineol	0.2581	0.560467	0.249133	0.5045	15.2987
Butanoic acid, 3-hexenyl ester, (Z)-	0.290467	0.322633	0	0.154467	15.1726
Methyl salicylate	1.5619	3.38853	5.0267	5.17533	15.4097
Decanal	0.543233	1.27573	0	1.2044	15.7094
β-Cyclocitral	0.151233	0.358167	0.1406	0.2441	16.1374
Nerol	0.1157	0.276433	0.3075	0.190267	16.3795
3-Hexenyl-α-methylbutyrate	0	1.19763	0	0.6299	16.4574
2-Hexenyl isovalerate	0	1.63023	0.0991667	0.932867	16.6254
Geraniol	0.215267	0.8385	0	0.728333	17.1004
Hexanoic acid, 3-hexenyl ester, (Z)-	0	1.18777	0	0.401833	20.4649
Hexanoic acid, hexyl ester	0	0.7403	0	0.3172	20.5891
Hexanoic acid, 2-hexenyl ester, (E)-	0	0.686367	0	0.159733	20.6751
E-Nerolidol	0	0.095	0	0.1745	22.3665
5,9-Undecadien-2-one, 6,10-dimethyl-	0	0.478267	0	0.626567	22.2835
β-Ionone	0.212967	0.554233	0.1578	0.230733	23.129
α-Bergamotene	0	0.239467	0	0.0977667	23.3194
α-Farnesene	0.0697667	2.0737	0.121033	0.108067	23.6468
Nerolidol	1e-05	0.256867	0.233233	0.414367	24.9673
